# Supplementary material
Source: publisher site journal article supplement (https://www.dovepress.com/article/406644)
Supplement: Supplementary file 1 [file Appendix_1.pdf › Appendix_1.pdf]

## Appendix 1: DEGs

| Gene          | logFC            | adj. P. Value   | AveExpr         | t                | P. Value        | B                |
|---------------|------------------|-----------------|-----------------|------------------|-----------------|------------------|
| AQP8          | -2.177573<br>517 | 4.23E-09        | 4.769284<br>76  | -7.779646<br>082 | 9.66E-13        | 18.489929<br>54  |
| CLDN8         | -1.710949<br>62  | 3.34E-05        | 3.659814<br>26  | -5.193304<br>076 | 6.43E-07        | 5.7400013<br>1   |
| SLC26A2       | -1.512273<br>147 | 2.12E-05        | 5.247508<br>03  | -5.321090<br>991 | 3.57E-07        | 6.2958422<br>19  |
| CWH43         | -1.486427<br>844 | 1.20E-06        | 4.783615<br>282 | -6.159355<br>894 | 6.05E-09        | 10.158034<br>82  |
| BEST2         | -1.389909<br>648 | 1.12E-07        | 4.264565<br>95  | -6.749137<br>816 | 2.82E-10        | 13.074695<br>46  |
| CA2           | -1.367057<br>235 | 4.59E-06        | 7.203591<br>28  | -5.768875<br>894 | 4.22E-08        | 8.3142845<br>05  |
| HMGCS2        | -1.322601<br>031 | 5.82E-08        | 4.411589<br>002 | -6.984462<br>927 | 7.98E-11        | 14.278323<br>14  |
| MS4A12        | -1.235831<br>089 | 8.25E-05        | 5.993604<br>341 | -4.907273<br>772 | 2.32E-06        | 4.5303063<br>89  |
| FAM55D        | -1.220567<br>727 | 3.50E-05        | 6.368466<br>431 | -5.178716<br>719 | 6.87E-07        | 5.6771436<br>41  |
| LOC3890<br>23 | -1.198659<br>617 | 7.90E-06        | 3.007999<br>956 | -5.607273<br>294 | 9.23E-08        | 7.5735318<br>26  |
| PDE6A         | -1.178673<br>904 | 1.01E-07        | 3.592495<br>574 | -6.785853<br>701 | 2.32E-10        | 13.261074<br>31  |
| CA1           | -1.154649<br>474 | 6.68E-06        | 5.311362<br>458 | -5.656387<br>863 | 7.29E-08        | 7.7972283<br>4   |
| UGT2B17       | -1.114714<br>04  | 0.009789<br>799 | 7.395091<br>178 | -3.202812<br>845 | 0.001652<br>764 | -1.551237<br>432 |
| SLC16A9       | -1.110648<br>372 | 1.34E-06        | 3.834472<br>797 | -6.129084<br>348 | 7.05E-09        | 10.012484<br>86  |
| PCK1          | -1.011498<br>161 | 0.003551<br>327 | 4.278069<br>192 | -3.601178<br>29  | 0.000426<br>338 | -0.318387<br>779 |
| SERPINA<br>3  | 1.0186011<br>06  | 1.09E-07        | 2.613233<br>599 | 6.7590559<br>94  | 2.68E-10        | 13.124989<br>97  |
| CXCL6         | 1.0349432<br>51  | 7.28E-06        | 3.026417<br>724 | 5.6300133<br>55  | 8.27E-08        | 7.6769460<br>4   |
| AQP9          | 1.0916318<br>94  | 0.000408<br>975 | 3.352588<br>038 | 4.3846277<br>44  | 2.14E-05        | 2.4507252<br>62  |
| MMP1          | 1.1127911<br>45  | 4.68E-06        | 3.925584<br>341 | 5.7625474<br>68  | 4.35E-08        | 8.2850232<br>14  |
| MME           | 1.1870621<br>98  | 2.22E-08        | 2.765631<br>843 | 7.2241663<br>03  | 2.16E-11        | 15.525521<br>77  |

|         |                  |                  |                  |                  |           |                  |
|---------|------------------|------------------|------------------|------------------|-----------|------------------|
| TNIP3   | 1. 2048401<br>63 | 0. 000791<br>71  | 3. 487058<br>392 | 4. 1570453<br>41 | 5. 32E-05 | 1. 6014767<br>87 |
| IDO1    | 1. 2723808<br>67 | 2. 73E-05        | 3. 901946<br>083 | 5. 2489029<br>72 | 4. 98E-07 | 5. 9807007<br>75 |
| CXCL9   | 1. 3465611<br>46 | 4. 80E-06        | 5. 402396<br>264 | 5. 7532845<br>63 | 4. 56E-08 | 8. 2422303<br>12 |
| VNN1    | 1. 3490287<br>87 | 1. 29E-08        | 3. 904729<br>775 | 7. 4365782<br>12 | 6. 66E-12 | 16. 647417<br>01 |
| LCN2    | 1. 3491632<br>05 | 7. 06E-06        | 6. 762342<br>276 | 5. 6417409<br>86 | 7. 82E-08 | 7. 7303855<br>59 |
| SLC6A14 | 1. 3833436<br>38 | 2. 86E-05        | 3. 891679<br>825 | 5. 2350786<br>16 | 5. 31E-07 | 5. 9206869<br>31 |
| DUOX2   | 1. 4329694<br>88 | 1. 85E-05        | 5. 247312<br>055 | 5. 3581940<br>08 | 3. 00E-07 | 6. 4589582<br>38 |
| CXCL1   | 1. 5115050<br>8  | 6. 25E-05        | 4. 775943<br>757 | 4. 9951206<br>51 | 1. 57E-06 | 4. 8966524<br>44 |
| REG3A   | 1. 5180261<br>92 | 2. 04E-05        | 4. 936190<br>264 | 5. 3352547<br>57 | 3. 34E-07 | 6. 3580195<br>71 |
| DEFB4A  | 1. 5827109<br>11 | 0. 000690<br>21  | 4. 037556<br>497 | 4. 2039052<br>17 | 4. 42E-05 | 1. 7734328<br>56 |
| S100A8  | 1. 5832713<br>76 | 3. 97E-05        | 5. 412933<br>691 | 5. 1379700<br>2  | 8. 27E-07 | 5. 5022166<br>38 |
| REG1A   | 1. 6530423<br>45 | 0. 000169<br>049 | 6. 420316<br>062 | 4. 6762108<br>25 | 6. 33E-06 | 3. 5893842<br>3  |
| REG1B   | 1. 6794348<br>89 | 9. 60E-05        | 4. 524003<br>927 | 4. 8634846<br>67 | 2. 81E-06 | 4. 3494461<br>72 |
| MMP3    | 1. 7332214<br>83 | 5. 56E-06        | 3. 859556<br>161 | 5. 7146810<br>52 | 5. 50E-08 | 8. 0643618<br>95 |
| DEFA5   | 1. 8184207<br>69 | 4. 86E-05        | 5. 918113<br>025 | 5. 0719454<br>92 | 1. 11E-06 | 5. 2208282<br>54 |
| DEFA6   | 1. 8563830<br>29 | 4. 67E-05        | 6. 398403<br>864 | 5. 0861662<br>79 | 1. 05E-06 | 5. 2812191<br>69 |
