# Supplementary material
Source: publisher site journal article supplement (https://www.dovepress.com/article/406644)
Supplement: Supplementary file 4 [file Appendix_2C.pdf › Appendix_2C.pdf]

| Gene symbol       | B cells naive              | B cells memory            | Plasma cells        | T cells CD8          | T cells CD4    |
|-------------------|----------------------------|---------------------------|---------------------|----------------------|----------------|
| naive             | T cells CD4 memory         | resting                   | T cells CD4 memory  | activated            | T cells        |
| follicular helper | T cells regulatory (Tregs) |                           | T cells gamma delta | NK cells resting     |                |
|                   | NK cells activated         | Monocytes                 | Macrophages M0      | Macrophages M1       | Macrophages M2 |
|                   | Dendritic cells resting    | Dendritic cells activated | Mast cells resting  | Mast cells activated |                |
|                   | Eosinophils                | Neutrophils               |                     |                      |                |
| ABCB4             | 555.7134486                | 10.744235                 | 7.225818568         | 4.311280198          | 4.605860048    |
|                   | 7.406441697                | 8.043975587               | 6.469992914         | 7.833081747          | 9.312294624    |
|                   | 13.68283856                | 4.556712661               | 6.202495893         | 7.951360487          | 27.55771004    |
|                   | 121.4322774                | 114.6367466               | 4.872184408         | 4.72798535           | 34.11365858    |
|                   | 15.03053048                | 14.90688846               |                     |                      |                |
| ABCB9             | 15.6035437                 | 22.09478724               | 653.3923279         | 24.22372293          | 35.67150717    |
|                   | 30.04819243                | 38.45542286               | 17.60479495         | 46.07365684          | 19.71572161    |
|                   | 21.8637228                 | 16.39614273               | 20.30942573         | 56.25188749          | 29.38087813    |
|                   | 40.39026017                | 123.9933055               | 23.38460308         | 53.46675672          | 23.61574571    |
|                   | 29.78644179                | 33.67914681               |                     |                      |                |
| ACAP1             | 215.3059512                | 321.6210208               | 38.61687228         | 1055.613378          | 1790.09717     |
|                   | 922.1527467                | 340.8834245               | 1107.798265         | 1995.482601          | 280.0757192    |
|                   | 512.636909                 | 387.5817422               | 190.8790244         | 48.97221651          | 30.97425375    |
|                   | 23.05515036                | 61.38654966               | 26.41292251         | 104.2001984          | 73.60793243    |
|                   | 696.4428018                | 596.0259609               |                     |                      |                |
| ACHE              | 15.11794931                | 16.64884729               | 22.12373672         | 13.42828841          | 27.18773248    |
|                   | 18.44492663                | 13.44126834               | 14.80554182         | 24.65271196          | 33.65844838    |
|                   | 16.65373849                | 13.44126834               | 16.37526833         | 13.6929629           | 1373.06962     |
|                   | 48.58576071                | 16.71547355               | 193.1599772         | 13.9487779           | 20.50124852    |
|                   | 40.41492672                | 22.76649356               |                     |                      |                |
| ACP5              | 605.8973843                | 1935.201479               | 1120.104684         | 306.3125193          | 744.6565995    |
|                   | 557.8198203                | 248.5469318               | 711.9497439         | 958.9160181          | 493.96912      |
|                   | 340.8201368                | 239.2770679               | 512.9313823         | 13644.1723           | 1062.475909    |
|                   | 7633.960182                | 13825.05363               | 3989.865169         | 263.4979304          | 323.3812772    |
|                   | 860.5633739                | 307.1427978               |                     |                      |                |
| ADAM28            | 1943.742699                | 1148.120138               | 324.7808001         | 22.6897181           | 40.06171311    |
|                   | 21.23331069                | 15.20961988               | 24.28140623         | 74.76633501          | 24.37075223    |
|                   | 193.6093922                | 94.40581808               | 58.3112027          | 54.96648703          | 274.639997     |
|                   | 360.6820442                | 37.29172579               | 53.21964861         | 137.8536284          | 116.8795038    |
|                   | 546.0061574                | 128.6860657               |                     |                      |                |
| ADAMDEC1          | 371.0335929                | 318.478799                | 127.9674477         | 44.61628687          | 80.9645004     |
|                   | 47.43351387                | 30.55297649               | 68.73789331         | 156.7076551          | 231.8272543    |
|                   | 68.27758592                | 48.39924584               | 106.301336          | 4464.262133          | 8524.022801    |
|                   | 5004.969419                | 164.8412494               | 1784.613941         | 730.1921708          | 1569.761722    |
|                   | 175.1699108                | 185.5059228               |                     |                      |                |
| ADAMTS3           | 146.1955683                | 106.052311                | 74.3391695          | 42.39041586          | 79.24179515    |
|                   | 57.38590645                | 53.41302407               | 35.41107579         | 76.28061758          | 65.26798809    |
|                   | 31.43526856                | 50.81967419               | 54.79707074         | 45.56049098          | 32.34016681    |
|                   | 33.35142773                | 48.69796983               | 44.22693487         | 650.1825865          | 406.2334876    |
|                   | 100.7360208                | 124.3571431               |                     |                      |                |
| ADRB2             | 486.3438163                | 510.0813396               | 289.7984504         | 899.6485015          | 77.15395496    |

|          |             |             |             |             |             |
|----------|-------------|-------------|-------------|-------------|-------------|
|          | 595.2105488 | 142.8319114 | 97.17422647 | 217.0627702 | 2378.452129 |
|          | 1957.53925  | 2360.471299 | 664.8839501 | 143.0178779 | 787.6239741 |
|          | 363.1850058 | 175.6334734 | 82.9116614  | 4628.681578 | 2887.874236 |
|          | 1969.028818 | 735.6634863 |             |             |             |
| AIF1     | 24.0742984  | 20.32185897 | 21.96957308 | 742.8158187 | 718.6147868 |
|          | 35.1722477  | 39.50876033 | 19.07768435 | 29.36703511 | 1086.959659 |
|          | 105.7345527 | 23.17042572 | 8655.680002 | 1841.269508 | 1611.228571 |
|          | 11610.29035 | 3285.640815 | 26.9238589  | 1851.124125 | 1672.630327 |
|          | 51.17646344 | 6260.640469 |             |             |             |
| AIM2     | 327.9580556 | 4538.991046 | 1429.674088 | 294.4846139 | 57.08079673 |
|          | 250.2995803 | 3311.978393 | 1115.681612 | 315.6458748 | 407.592905  |
|          | 87.22742351 | 134.4958651 | 536.1118999 | 181.9571    | 2965.888162 |
|          | 148.2845223 | 176.9615884 | 907.0399616 | 93.47144882 | 62.12545422 |
|          | 117.5077056 | 794.2145572 |             |             |             |
| ALOX15   | 12.23359461 | 13.75323798 | 9.073509293 | 9.774971658 | 18.5565618  |
|          | 12.00966261 | 5.239540575 | 13.15225266 | 22.38142497 | 14.4527592  |
|          | 30.17685432 | 9.776317635 | 9.800855372 | 6.621226619 | 5.412216318 |
|          | 430.3353048 | 2907.327994 | 30.34226562 | 11.13947086 | 10.6548502  |
|          | 355.2522822 | 30.06854621 |             |             |             |
| ALOX5    | 1799.683549 | 2425.680554 | 190.3314674 | 78.68443963 | 74.93090365 |
|          | 132.0101224 | 59.08735916 | 35.00087493 | 143.0134329 | 441.5556233 |
|          | 157.0365044 | 121.9977952 | 1979.301155 | 788.5397751 | 83.30089783 |
|          | 248.3724724 | 118.4834954 | 73.10596198 | 641.1396907 | 590.9257381 |
|          | 1460.758519 | 2917.27138  |             |             |             |
| AMPD1    | 263.7450621 | 217.7617272 | 3012.768061 | 66.1074899  | 68.66194527 |
|          | 85.31836726 | 68.46140597 | 53.95513652 | 79.26421174 | 114.0495383 |
|          | 59.1404365  | 60.67685001 | 98.2326067  | 76.54456664 | 62.39764428 |
|          | 59.95269372 | 89.21099812 | 60.64349611 | 56.2085768  | 75.44109945 |
|          | 118.498452  | 173.7766404 |             |             |             |
| ANGPT4   | 23.12217296 | 21.31255675 | 230.6806713 | 44.68465936 | 22.06014827 |
|          | 44.47513375 | 99.59399622 | 101.445586  | 29.46507768 | 29.2585845  |
|          | 9.380755775 | 26.17664299 | 16.91869965 | 39.33257003 | 21.218127   |
|          | 17.89428495 | 12.01870358 | 33.41141421 | 31.32955998 | 11.8097012  |
|          | 34.7186708  |             |             | 14.81234386 |             |
| ANKRD55  | 284.4126543 | 218.9158033 | 117.2003668 | 141.6981114 | 1853.335599 |
|          | 436.4203479 | 79.77497227 | 1077.33032  | 123.8806106 | 176.2438812 |
|          | 83.38527977 | 88.45957062 | 126.1078201 | 123.600429  | 96.20392388 |
|          | 48.55417359 | 108.0271283 | 133.5596277 | 153.2289329 | 104.3009962 |
|          | 1068.295022 | 415.2425186 |             |             |             |
| APOBEC3A | 102.4291739 | 89.60068607 | 99.59399622 | 64.35533705 | 107.2355131 |
|          | 52.73721382 | 57.78231649 | 71.37789026 | 36.39006843 | 723.1437605 |
|          | 253.3068151 | 132.2193618 | 2415.197908 | 85.2400852  | 4501.140479 |
|          | 148.7993403 | 107.913789  | 2637.278954 | 71.9207859  | 33.35485521 |
|          | 1137.484256 | 5584.333309 |             |             |             |
| APOBEC3G | 1283.451966 | 1135.293933 | 2034.562362 | 2090.85254  | 336.6456997 |
|          | 2340.674986 | 1540.772502 | 386.0535874 | 979.7203756 | 5415.054458 |
|          | 6314.770723 | 8895.302228 | 865.7405246 | 278.7681406 | 1036.993881 |

|          |             |             |             |             |             |
|----------|-------------|-------------|-------------|-------------|-------------|
|          | 258.3004281 | 203.4477818 | 1393.358139 | 627.1314036 | 327.1943796 |
|          | 306.3062145 | 464.4412542 |             |             |             |
| APOL3    | 222.6275107 | 530.3981335 | 754.8680347 | 1209.122376 | 950.7902718 |
|          | 1615.032254 | 1119.486881 | 351.1290483 | 993.4624966 | 1173.270474 |
|          | 1172.693097 | 1002.837652 | 1000.826958 | 238.5980956 | 11009.29392 |
|          | 437.5272083 | 219.6004846 | 861.4587391 | 264.675663  | 98.21606371 |
|          | 107.8051428 | 106.4245095 |             |             |             |
| APOL6    | 17.31182151 | 11.60650829 | 7.831610308 | 8.448971352 | 11.96227918 |
|          | 8.439383107 | 57.5171862  | 7.177587337 | 13.36764224 | 9.718189532 |
|          | 12.85527177 | 370.3966282 | 11.82068745 | 13.10943681 | 967.6451456 |
|          | 7.784612131 | 9.135536319 | 159.5346364 | 23.12992518 | 8.195434224 |
|          | 5.952127004 | 19.07117143 |             |             |             |
| AQP9     | 21.34280658 | 15.11459289 | 15.66433549 | 13.67548268 | 14.1921014  |
|          | 14.8941249  | 13.11596785 | 18.66670647 | 64.26406026 | 188.8727485 |
|          | 93.46925864 | 12.57775597 | 2044.034835 | 4583.500675 | 4309.341662 |
|          | 399.4746192 | 1132.650087 | 1454.899429 | 576.553304  | 1876.266127 |
|          | 128.8196425 | 13705.68672 |             |             |             |
| ARHGAP22 | 34.63556475 | 48.31289928 | 23.83351793 | 45.01409912 | 71.86055345 |
|          | 22.63123607 | 15.45266056 | 25.40966715 | 32.56780804 | 12.49456627 |
|          | 82.42753503 | 27.39864055 | 54.80800174 | 175.4574354 | 351.5922058 |
|          | 272.9890572 | 319.7744126 | 2985.731104 | 46.74782224 | 52.54547172 |
|          | 81.64009182 | 20.41036041 |             |             |             |
| ARRB1    | 15.93115384 | 15.19815814 | 18.99250539 | 19.09130442 | 18.71219759 |
|          | 25.18421938 | 23.05515036 | 18.44492663 | 7.896579688 | 15.11426723 |
|          | 57.39670667 | 138.9893405 | 440.2370047 | 333.3962724 | 946.0138184 |
|          | 395.5562302 | 43.10758498 | 32.66449377 | 44.46607563 | 31.29032739 |
|          | 26.07419288 | 32.74962107 |             |             |             |
| ASGR1    | 40.87013431 | 42.49782741 | 42.61290526 | 12.18880923 | 10.8262442  |
|          | 13.27420938 | 8.195551244 | 5.122171371 | 19.55662923 | 304.7934605 |
|          | 10.82390469 | 15.2477554  | 976.7071792 | 108.7218916 | 25.23626149 |
|          | 155.4913385 | 76.17616916 | 33.71862306 | 55.01698406 | 65.87597482 |
|          | 40.3944073  | 75.07267777 |             |             |             |
| ASGR2    | 30.26095627 | 33.90854185 | 33.91363549 | 29.78023761 | 36.87140683 |
|          | 41.82249473 | 34.46381595 | 31.38273532 | 113.2301347 | 167.1042382 |
|          | 29.55398187 | 29.87461252 | 1484.961048 | 36.11978652 | 26.3738691  |
|          | 760.7257707 | 48.75909319 | 23.49623112 | 23.98629172 | 20.52967572 |
|          | 51.1819622  | 49.90264894 |             |             |             |
| ATHL1    | 367.9599908 | 535.7827614 | 782.0675728 | 806.0999282 | 5333.944658 |
|          | 794.9480224 | 231.1788185 | 1765.552386 | 250.5151658 | 216.9823771 |
|          | 570.547141  | 277.0846656 | 183.2808703 | 52.25820981 | 167.5032595 |
|          | 132.631945  | 31.12354897 | 26.36096779 | 72.34940321 | 60.48932464 |
|          | 329.5023981 | 1241.008114 |             |             |             |
| ATP8B4   | 123.6149862 | 86.80594392 | 83.72565704 | 69.79360213 | 59.88926338 |
|          | 51.01417813 | 77.34829047 | 29.05340287 | 58.6310728  | 106.4715425 |
|          | 612.7580118 | 1035.862627 | 219.3440174 | 106.0706443 | 33.35142773 |
|          | 1163.254876 | 641.207958  | 109.3567651 | 1798.044318 | 2105.047172 |
|          | 386.1946805 | 95.69691227 |             |             |             |

|         |             |             |             |             |             |
|---------|-------------|-------------|-------------|-------------|-------------|
| ATXN80S | 19.03486997 | 17.5814772  | 131.4519579 | 12.10850879 | 11.61080204 |
|         | 12.65987353 | 12.98839722 | 12.42360351 | 16.7813537  | 24.88673795 |
|         | 10.34693112 | 9.398323168 | 10.41544387 | 10.99877982 | 13.34400281 |
|         | 11.40281159 | 10.34858245 | 12.37331355 | 22.20849492 | 8.571375787 |
|         | 19.43850977 | 15.56008373 |             |             |             |
| AZU1    | 26.08448842 | 37.31588708 | 54.50569955 | 75.49418368 | 9.996682874 |
|         | 45.14159359 | 20.30359339 | 12.10187282 | 11.81131187 | 32.59050723 |
|         | 411.6451897 | 118.8706557 | 96.50450872 | 51.60165293 | 163.9010445 |
|         | 315.8328244 | 63.667765   | 58.98475492 | 600.0026635 | 1034.586818 |
|         | 114.3003623 | 82.37125482 |             |             |             |
| BACH2   | 4442.146224 | 1237.156184 | 145.9248694 | 716.5762166 | 1423.65694  |
|         | 449.1787857 | 442.4757485 | 245.0583665 | 444.6850323 | 597.1505699 |
|         | 478.0988813 | 511.1200359 | 52.1091524  | 60.73069122 | 78.3338478  |
|         | 56.28089968 | 58.86433429 | 82.81441868 | 78.94686859 | 68.30005918 |
|         | 187.9346031 | 132.7648842 |             |             |             |
| BANK1   | 7633.960182 | 9177.359918 | 108.7748971 | 27.08870144 | 39.56449682 |
|         | 35.51276327 | 4.929861418 | 18.99250539 | 33.46526866 | 55.75942073 |
|         | 33.00482498 | 37.1948578  | 86.58724759 | 7.014183016 | 16.02027146 |
|         | 29.19263501 | 49.22937803 | 19.41137259 | 79.8154876  | 92.53939613 |
|         | 993.0314299 | 39.18510516 |             |             |             |
| BARX2   | 16.2562128  | 22.62509146 | 15.03185841 | 14.68073716 | 13.89894647 |
|         | 10.89927471 | 17.9020085  | 19.74347261 | 400.0920776 | 134.5869269 |
|         | 19.02444933 | 26.10193827 | 18.15622799 | 17.14187893 | 15.56608274 |
|         | 28.07283413 | 22.65017098 | 21.75934628 | 48.17655596 | 26.33223631 |
|         | 65.61241103 | 61.55854792 |             |             |             |
| BCL11B  | 166.5812991 | 133.7136259 | 149.8210195 | 4183.738789 | 7177.230404 |
|         | 4962.937555 | 842.2142194 | 3186.537019 | 2748.114787 | 2581.692496 |
|         | 818.2107999 | 512.27635   | 88.02675109 | 78.00838097 | 68.0390322  |
|         | 51.07857308 | 95.81819269 | 76.4604343  | 53.86480939 | 52.15823403 |
|         | 306.9880201 | 166.8927472 |             |             |             |
| BCL2A1  | 112.6417383 | 314.019133  | 76.39326014 | 575.0352025 | 452.9144897 |
|         | 755.8584033 | 1206.5058   | 698.6513948 | 171.062582  | 431.9749142 |
|         | 539.9592883 | 526.5774707 | 2261.391134 | 5560.455558 | 7038.536622 |
|         | 195.959802  | 135.5924775 | 5551.253657 | 869.1471248 | 3291.227822 |
|         | 13257.93204 | 8790.33201  |             |             |             |
| BCL7A   | 1097.312303 | 437.9146743 | 201.8089576 | 119.2680253 | 118.1838416 |
|         | 78.52160611 | 52.25679554 | 70.53816317 | 182.5834686 | 53.79298261 |
|         | 31.50174882 | 60.22893457 | 53.33648066 | 55.79800075 | 131.3538432 |
|         | 185.7375226 | 281.3217082 | 211.8047471 | 156.3160764 | 190.530536  |
|         | 79.74570454 | 121.2861905 |             |             |             |
| BEND5   | 571.2009408 | 267.7407888 | 197.8545424 | 159.6750731 | 219.5683455 |
|         | 64.9845649  | 51.46605096 | 54.2462042  | 28.02242234 | 56.17742997 |
|         | 74.64354417 | 37.21954547 | 57.98412082 | 67.04718628 | 57.11383215 |
|         | 51.61492393 | 66.09074337 | 79.33688539 | 54.23882638 | 63.18438861 |
|         | 82.16727965 | 102.1569818 |             |             |             |
| BFSP1   | 8.615516504 | 12.0925165  | 9.834897324 | 19.66358081 | 130.3828712 |
|         | 8.910362721 | 12.08950821 | 59.32684348 | 14.5326211  | 111.388406  |

|         |              |              |              |              |              |
|---------|--------------|--------------|--------------|--------------|--------------|
|         | 34. 61450761 | 19. 45168576 | 21. 37855994 | 15. 68206397 | 36. 95107529 |
|         | 30. 8024485  | 19. 39633132 | 12. 20057862 | 34. 02291075 | 49. 68496671 |
|         | 13. 21796321 | 19. 08652196 |              |              |              |
| BHLHE41 | 227. 283923  | 379. 2503375 | 981. 1066215 | 45. 2704192  | 17. 67634993 |
|         | 26. 70594032 | 66. 17589119 | 22. 22269743 | 114. 5180865 | 88. 6299037  |
|         | 51. 53421812 | 51. 58608454 | 42. 84587819 | 5455. 337361 | 143. 8681079 |
|         | 325. 12977   | 328. 1155298 | 552. 0522552 | 257. 3486083 | 252. 5016943 |
|         | 54. 15551876 | 77. 67945327 |              |              |              |
| BIRC3   | 1762. 323129 | 1072. 239215 | 363. 8164437 | 370. 9307246 | 677. 9807091 |
|         | 1121. 424012 | 2888. 707681 | 402. 5623243 | 2449. 370773 | 238. 9246256 |
|         | 283. 6871924 | 1173. 96483  | 159. 952492  | 230. 7650134 | 1971. 112539 |
|         | 237. 5017836 | 442. 7298273 | 10553. 57544 | 71. 25617244 | 1951. 560424 |
|         | 1582. 230325 | 132. 8542597 |              |              |              |
| BLK     | 1788. 424777 | 3284. 235489 | 42. 03948876 | 136. 3936481 | 67. 99945866 |
|         | 19. 16528476 | 10. 42128191 | 89. 85602787 | 9. 580065844 | 20. 71481403 |
|         | 10. 05664906 | 12. 25757399 | 34. 13408456 | 15. 52409402 | 11. 8204986  |
|         | 14. 41666747 | 15. 2857867  | 16. 7439792  | 10. 55696945 | 8. 164952674 |
|         | 38. 700173   | 9. 863599005 |              |              |              |
| BMP2K   | 282. 3095234 | 216. 4337119 | 104. 8531332 | 117. 76525   | 109. 3081052 |
|         | 42. 06887765 | 146. 6778838 | 224. 3125249 | 77. 32098601 | 118. 8177698 |
|         | 107. 0425872 | 117. 2003668 | 350. 5910579 | 323. 5873864 | 655. 4319287 |
|         | 971. 8036512 | 427. 6761572 | 620. 4619299 | 2822. 782124 | 2472. 95602  |
|         | 900. 2382074 | 588. 9037939 |              |              |              |
| BPI     | 10. 46971467 | 14. 03167905 | 15. 2477554  | 64. 13890515 | 41. 29948278 |
|         | 12. 50772288 | 6. 382539853 | 15. 19584325 | 10. 77959704 | 19. 43743846 |
|         | 837. 2008291 | 166. 0621042 | 280. 0017084 | 15. 02182134 | 16. 53368601 |
|         | 25. 96026018 | 13. 48246933 | 14. 91304029 | 973. 6001576 | 829. 760687  |
|         | 390. 5882271 | 60. 80053179 |              |              |              |
| BRAF    | 2571. 803933 | 974. 3131867 | 492. 0692023 | 178. 6931052 | 101. 0267209 |
|         | 155. 551421  | 178. 3523031 | 102. 1260256 | 593. 3232903 | 441. 0280541 |
|         | 298. 7194597 | 257. 1799046 | 264. 8782577 | 312. 9311159 | 369. 770593  |
|         | 191. 008753  | 230. 0949786 | 360. 063401  | 153. 4806628 | 301. 8437696 |
|         | 925. 5224912 | 721. 2799495 |              |              |              |
| BRSK2   | 10. 44585498 | 4. 456868898 | 34. 32244633 | 10. 46220047 | 7. 924164041 |
|         | 16. 19041478 | 40. 50367377 | 54. 73054355 | 14. 7642389  | 61. 61611091 |
|         | 18. 27029466 | 17. 22013091 | 11. 75864418 | 9. 848570784 | 10. 52617889 |
|         | 8. 886630463 | 7. 49854918  | 28. 80995339 | 46. 23597972 | 15. 48193395 |
|         | 8. 252301573 | 11. 86171476 |              |              |              |
| BST1    | 65. 21842011 | 67. 5879307  | 33. 76856098 | 68. 85559845 | 129. 3703853 |
|         | 67. 69994038 | 71. 82322708 | 62. 2914124  | 44. 30333794 | 322. 4608558 |
|         | 151. 4101449 | 86. 13707715 | 1567. 219569 | 390. 5390601 | 73. 76833139 |
|         | 209. 4648222 | 154. 2773488 | 113. 982438  | 427. 4998589 | 444. 1675314 |
|         | 10. 16106693 | 1750. 231329 |              |              |              |
| BTNL8   | 15. 22236138 | 13. 26757452 | 9. 870549848 | 13. 49547351 | 23. 17042572 |
|         | 17. 46905843 | 21. 218127   | 16. 64319163 | 35. 14611792 | 44. 08665866 |
|         | 11. 54872001 | 13. 71677829 | 20. 1092024  | 25. 72341908 | 18. 63943005 |
|         | 10. 71025113 | 16. 44465145 | 18. 98239767 | 13. 13000302 | 16. 68244608 |

|          |             |             |             |             |             |
|----------|-------------|-------------|-------------|-------------|-------------|
|          | 99.58265357 | 1062.582186 |             |             |             |
| C11orf80 | 531.8492615 | 393.7715656 | 2192.7069   | 162.5847884 | 91.4854186  |
|          | 158.5148937 | 138.9893405 | 136.961868  | 92.03471807 | 149.3466966 |
|          | 100.49005   | 141.0093392 | 85.67243058 | 99.33436102 | 34.48872876 |
|          | 88.34055902 | 103.7648187 | 141.8654708 | 147.6024091 | 142.9001411 |
|          | 157.069336  | 101.6588003 |             |             |             |
| C1orf54  | 41.71079514 | 44.30946814 | 113.0970394 | 244.0295762 | 292.5617552 |
|          | 288.2644361 | 109.8410784 | 87.19841264 | 51.31778403 | 125.6817604 |
|          | 162.6593193 | 73.10888641 | 395.0230177 | 1418.001252 | 1157.753062 |
|          | 2036.475768 | 4773.895505 | 1134.906101 | 277.2757208 | 305.2108103 |
|          | 422.5487977 | 49.30939393 |             |             |             |
| C3AR1    | 131.0995558 | 97.68302989 | 235.8730787 | 218.067024  | 100.57262   |
|          | 198.3433582 | 109.0856459 | 110.3968405 | 521.2960334 | 667.738611  |
|          | 753.7180287 | 473.1714371 | 1337.368233 | 799.6447121 | 4247.947251 |
|          | 2754.457112 | 879.0878468 | 259.2776033 | 4587.545998 | 4865.330497 |
|          | 9437.290602 | 746.04456   |             |             |             |
| C5AR1    | 92.39233333 | 64.88366132 | 25.374709   | 71.29814039 | 39.1758312  |
|          | 24.57422621 | 23.7998802  | 27.36083709 | 42.31424562 | 422.4027943 |
|          | 335.1748215 | 170.9594157 | 4237.561451 | 4989.998907 | 262.8037637 |
|          | 1920.668117 | 1195.953955 | 889.9578222 | 536.888673  | 756.9007984 |
|          | 2647.728393 | 12587.17469 |             |             |             |
| C5AR2    | 8.032047496 | 16.66742886 | 15.10593558 | 5.512627066 | 50.36671815 |
|          | 6.818438323 | 16.3457722  | 8.182355675 | 46.59340554 | 21.2390901  |
|          | 35.45497764 | 28.87408345 | 56.84374943 | 41.54578326 | 16.69585423 |
|          | 59.05366978 | 24.61393679 | 18.84768096 | 3.57062816  | 40.86964441 |
|          | 286.0155699 | 383.2737567 |             |             |             |
| CA8      | 17.99617948 | 18.54386568 | 16.86720259 | 13.31718235 | 19.53973873 |
|          | 16.42178108 | 15.32647154 | 200.6236992 | 43.54005187 | 62.32018113 |
|          | 14.15699793 | 14.46846851 | 14.00907196 | 12.5219856  | 31.46897563 |
|          | 13.25016669 | 11.51310402 | 32.21701547 | 72.2168953  | 144.6321597 |
|          | 15.50755364 | 25.59129039 |             |             |             |
| CAMP     | 32.24981999 | 29.66511957 | 52.127423   | 76.14506063 | 148.5655127 |
|          | 101.7397638 | 32.63242659 | 121.3399664 | 33.09276144 | 40.18619522 |
|          | 1655.267194 | 130.333791  | 126.178855  | 187.3573662 | 81.65650077 |
|          | 105.4403669 | 94.82321767 | 41.52861367 | 223.2341403 | 175.1542212 |
|          | 529.4562817 | 1507.37221  |             |             |             |
| CASP5    | 16.22879037 | 25.41117138 | 7.489070848 | 20.72194816 | 11.62316713 |
|          | 9.073509293 | 7.44133492  | 44.6725684  | 117.8506598 | 13.78588342 |
|          | 35.16192527 | 57.15128061 | 120.1766089 | 50.41398411 | 518.0757148 |
|          | 31.73041766 | 21.43059083 | 52.52248298 | 9.129396815 | 70.37132603 |
|          | 59.19731483 | 483.5047319 |             |             |             |
| CCDC102B | 7.52422977  | 6.165616203 | 6.184617618 | 17.7200176  | 9.251047619 |
|          | 13.31038127 | 1.761755136 | 6.133755741 | 5.824258226 | 17.08721371 |
|          | 21.31213885 | 3.261428192 | 5.674857963 | 207.1228817 | 1.538367713 |
|          | 2.556420269 | 146.6828382 | 8.571628691 | 36.9435694  | 6.50271849  |
|          | 30.7604336  | 6.416534838 |             |             |             |
| CCL1     | 9.151450435 | 10.41823708 | 10.05715446 | 10.7845404  | 22.5839555  |

|              |              |              |              |              |
|--------------|--------------|--------------|--------------|--------------|
| 9. 669430796 | 15. 97030854 | 12. 61652384 | 9. 104707458 | 11. 24956199 |
| 11. 53343942 | 29. 60547378 | 11. 12331494 | 12. 30972478 | 13. 39276407 |
| 10. 20717886 | 10. 50372943 | 366. 165883  | 7. 259316561 | 1266. 591321 |
| 9. 884652732 | 9. 407691897 |              |              |              |
| CCL13        | 195. 3507704 | 171. 4302952 | 101. 3596853 | 120. 948249  |
|              | 41. 65976896 |              |              |              |
| 118. 4029297 | 66. 04578922 | 12. 70708557 | 75. 51129905 | 72. 33766521 |
| 95. 02050924 | 96. 66643251 | 87. 08769892 | 166. 9319287 | 182. 2839096 |
| 6581. 432651 | 3717. 503489 | 5513. 790278 | 101. 0268889 | 675. 8697907 |
| 121. 9773443 | 105. 3162645 |              |              |              |
| CCL14        | 70. 01715851 | 58. 91915912 | 153. 5523731 | 71. 06446098 |
|              | 31. 21088513 |              |              |              |
| 91. 76959128 | 77. 60907212 | 33. 08789345 | 152. 0417291 | 152. 9884125 |
| 67. 54459099 | 72. 99488239 | 105. 0702474 | 166. 0197886 | 1233. 172359 |
| 2459. 096418 | 283. 0117609 | 172. 6730315 | 98. 30151884 | 149. 3226672 |
| 119. 0063797 | 248. 3181959 |              |              |              |
| CCL17        | 42. 21616032 | 58. 99587921 | 82. 14621562 | 78. 50428281 |
|              | 19. 48358652 |              |              |              |
| 30. 30478142 | 170. 3383554 | 38. 03375116 | 393. 9264602 | 59. 77162048 |
| 75. 01179342 | 38. 77174192 | 67. 76049878 | 114. 8422294 | 55. 41158071 |
| 620. 2134606 | 2541. 410819 | 6414. 906541 | 26. 61741896 | 45. 95170735 |
| 91. 92866442 | 34. 28591541 |              |              |              |
| CCL18        | 19. 93877192 | 21. 68816978 | 56. 60919591 | 35. 31761702 |
|              | 24. 35123147 |              |              |              |
| 12. 82579482 | 81. 202364   | 31. 27670734 | 20. 56828687 | 109. 4946381 |
|              | 39. 1384328  |              |              |              |
| 79. 51319871 | 40. 68134871 | 2820. 01871  | 1252. 527933 | 12334. 37123 |
| 1697. 959294 | 1749. 786143 | 423. 1104795 | 930. 7824996 | 47. 81945962 |
| 49. 52876721 |              |              |              |              |
| CCL19        | 78. 52160611 | 139. 7443318 | 258. 1016824 | 77. 62297831 |
|              | 36. 87140683 |              |              |              |
| 60. 92923205 | 89. 77834495 | 48. 98562369 | 34. 99339888 | 21. 17848138 |
| 109. 9231796 | 146. 4600699 | 115. 5525527 | 114. 3667988 | 32553. 88074 |
| 137. 0742038 | 170. 8471166 | 3048. 871233 | 38. 04867174 | 19. 15243809 |
| 152. 8012995 | 117. 2636391 |              |              |              |
| CCL20        | 39. 50876033 | 26. 99246182 | 13. 71677829 | 61. 54110043 |
|              | 13. 08202394 |              |              |              |
| 29. 40136468 | 1562. 138826 | 188. 6755023 | 12. 36926288 | 18. 13033499 |
| 18. 43517451 | 20. 31818041 | 18. 85113165 | 11. 31047112 | 724. 6148681 |
| 12. 8049967  | 14. 52087814 | 1509. 776445 | 13. 96528518 | 5473. 438695 |
| 31. 12895874 | 22. 44468073 |              |              |              |
| CCL22        | 46. 07125476 | 31. 32507211 | 19. 84751256 | 24. 03529684 |
|              | 39. 42959137 |              |              |              |
| 27. 87853733 | 28. 17031886 | 24. 33306321 | 560. 1844434 | 23. 02227816 |
| 26. 9167755  | 76. 9655571  | 33. 117333   | 2604. 46642  | 464. 9729614 |
| 880. 2022045 | 4123. 086134 | 30950. 32751 | 24. 52312784 | 113. 920916  |
| 94. 52151623 | 59. 92678374 |              |              |              |
| CCL23        | 19. 74347261 | 16. 59253631 | 53. 41302407 | 15. 31837372 |
|              | 19. 69815613 |              |              |              |
| 27. 6569304  | 5. 971548735 | 13. 44126834 | 70. 65994811 | 22. 99098158 |
| 64. 61571582 | 43. 88212709 | 37. 98614378 | 244. 4793596 | 615. 574234  |
| 5505. 223986 | 321. 7810006 | 377. 5397731 | 662. 6987872 | 545. 134546  |
| 534. 1983137 | 58. 68966344 |              |              |              |
| CCL4         | 1661. 464071 | 817. 4816647 | 307. 8066133 | 2564. 294556 |
|              | 270. 8722361 |              |              |              |
| 442. 4757485 | 11191. 41447 | 356. 4726389 | 481. 2791164 | 8310. 145807 |
| 11202. 80591 | 38944. 01868 | 3000. 888772 | 1968. 542066 | 11885. 1113  |

|       |             |             |             |             |             |
|-------|-------------|-------------|-------------|-------------|-------------|
|       | 3139.008389 | 2072.163482 | 4282.933369 | 1133.500818 | 35339.68536 |
|       | 6568.915331 | 2680.048326 |             |             |             |
| CCL5  | 19.56849893 | 88.23956549 | 30.32542187 | 11434.94887 | 189.4932768 |
|       | 3143.971755 | 1850.010235 | 69.75841522 | 171.0009164 | 19080.91475 |
|       | 17238.65692 | 11744.53738 | 102.8425968 | 100.2336827 | 16862.16904 |
|       | 250.750217  | 59.29347738 | 6507.212063 | 46.19150568 | 660.0913807 |
|       | 300.4379114 | 133.3630669 |             |             |             |
| CCL7  | 80.54919503 | 45.94840622 | 58.10858778 | 54.29720304 | 48.24358597 |
|       | 38.5055913  | 22.95842907 | 53.34937988 | 55.4673111  | 74.50448787 |
|       | 33.53994623 | 21.32839265 | 36.20654238 | 651.3648029 | 241.0650179 |
|       | 85.74723008 | 24.2434917  | 72.95235312 | 137.7438512 | 956.4362847 |
|       | 108.0688126 | 97.336807   |             |             |             |
| CCL8  | 229.3383995 | 97.02939896 | 105.7382506 | 35.05420149 | 31.42579269 |
|       | 64.22389989 | 82.98777026 | 40.64411705 | 77.90022347 | 105.8701548 |
|       | 49.61858818 | 49.04713211 | 126.7672449 | 152.3193862 | 4535.517152 |
|       | 2829.09296  | 85.43977671 | 1523.493213 | 59.52076258 | 1333.111492 |
|       | 24.19311858 | 94.60984879 |             |             |             |
| CCND2 | 299.0433892 | 447.6145479 | 677.7138981 | 682.2085787 | 363.696915  |
|       | 1162.572673 | 2369.155331 | 460.6314841 | 1118.95465  | 330.7988708 |
|       | 1065.420393 | 6016.733404 | 196.775837  | 378.8110795 | 81.43053168 |
|       | 108.189616  | 428.1711403 | 308.3936468 | 337.1012133 | 466.6854945 |
|       | 449.4451946 | 314.0695212 |             |             |             |
| CCR10 | 52.98873326 | 92.31546536 | 773.8184665 | 130.744128  | 64.30250203 |
|       | 282.9223926 | 67.60022415 | 100.7324553 | 54.44144843 | 50.76403215 |
|       | 81.81890669 | 50.05941379 | 68.90758909 | 63.12794941 | 57.58401637 |
|       | 73.7311384  | 54.79311967 | 76.23824701 | 50.87012491 | 73.11439148 |
|       | 139.3579335 | 97.53796277 |             |             |             |
| CCR2  | 420.0370653 | 360.0216463 | 1710.33313  | 312.6203444 | 64.9467235  |
|       | 756.5516447 | 297.1447653 | 95.47693449 | 258.8984705 | 1151.152529 |
|       | 92.11909435 | 97.00535628 | 2908.726283 | 122.7713689 | 80.9645004  |
|       | 74.52120484 | 115.7528109 | 117.1398876 | 115.0116104 | 63.82847845 |
|       | 213.9862512 | 243.2288166 |             |             |             |
| CCR3  | 135.0222303 | 31.14530202 | 52.48031743 | 51.21539926 | 12.07805481 |
|       | 88.58205857 | 53.98997768 | 20.4848163  | 260.9680321 | 37.49630312 |
|       | 128.2007913 | 81.07845472 | 83.4012701  | 79.25178432 | 59.88926338 |
|       | 39.09280883 | 83.69246929 | 66.10168276 | 33.17881936 | 72.43377329 |
|       | 6575.502616 | 1435.2148   |             |             |             |
| CCR5  | 98.76355416 | 93.00951267 | 46.81934    | 992.0442583 | 75.4038863  |
|       | 462.1524294 | 423.3973006 | 530.4856724 | 503.0168012 | 2444.179396 |
|       | 578.4832233 | 1425.773385 | 489.987509  | 2191.941547 | 1493.347557 |
|       | 787.3000077 | 1515.597414 | 624.5662045 | 149.3747509 | 260.5538316 |
|       | 130.089752  | 85.86154472 |             |             |             |
| CCR6  | 327.4987971 | 331.0843447 | 40.64411705 | 173.0896162 | 69.04044011 |
|       | 486.3438163 | 155.6717837 | 151.0907582 | 101.9853805 | 262.8582877 |
|       | 46.43838291 | 122.9424087 | 29.59035049 | 17.97363923 | 25.58895596 |
|       | 29.92011687 | 30.03002814 | 42.18974701 | 27.61848758 | 31.69929888 |
|       | 34.98004676 | 45.63378677 |             |             |             |



|       |             |             |             |             |             |
|-------|-------------|-------------|-------------|-------------|-------------|
| CCR7  | 3811.326733 | 1939.045683 | 202.9261759 | 5074.201816 | 8788.597127 |
|       | 2693.556404 | 2885.120974 | 1858.531026 | 6339.949771 | 490.8051753 |
|       | 672.4665585 | 482.4429323 | 165.2353496 | 328.1949289 | 17366.91051 |
|       | 123.7463123 | 290.530233  | 14223.15516 | 66.65895255 | 81.24584846 |
|       | 647.9636327 | 376.1557339 |             |             |             |
| CD160 | 446.1294222 | 281.8251718 | 129.5641036 | 1145.34982  | 114.9678358 |
|       | 125.3243228 | 159.1785523 | 73.65633284 | 249.1195624 | 3283.208487 |
|       | 2499.533496 | 688.496341  | 93.85626167 | 89.41070681 | 67.99945866 |
|       | 36.95107529 | 71.95840084 | 78.86266197 | 64.10120829 | 95.57948479 |
|       | 170.0131077 | 231.9423322 |             |             |             |
| CD180 | 1502.166724 | 2247.885466 | 1123.318028 | 78.77964471 | 23.15489547 |
|       | 37.96319899 | 83.10064157 | 48.86157308 | 179.2163466 | 131.4034549 |
|       | 37.04952547 | 30.94941671 | 576.4469199 | 201.3638474 | 120.0804247 |
|       | 2787.643912 | 108.5104996 | 93.2676663  | 64.1551368  | 52.74308227 |
|       | 108.1883623 | 110.5409754 |             |             |             |
| CD19  | 7315.689158 | 5295.93686  | 1743.474914 | 132.2416591 | 128.2039752 |
|       | 55.61361754 | 93.42592839 | 148.8556127 | 217.5476871 | 147.7927672 |
|       | 90.4860579  | 98.40190703 | 164.9026221 | 98.83889476 | 106.4449014 |
|       | 146.6235694 | 122.9982229 | 161.3344231 | 121.1411991 | 130.640189  |
|       | 393.1656925 | 257.8963108 |             |             |             |
| CD1A  | 1294.174017 | 818.7834717 | 504.0040168 | 208.3949257 | 135.3722907 |
|       | 191.4053509 | 139.7165139 | 156.4816454 | 511.8243369 | 265.2998497 |
|       | 152.5357864 | 145.9248694 | 312.0225877 | 224.9858071 | 160.945247  |
|       | 156.9391502 | 14772.22773 | 1315.229715 | 110.8168315 | 174.7119173 |
|       | 260.6061886 | 419.7944138 |             |             |             |
| CD1B  | 1351.157456 | 338.3307439 | 343.6898904 | 55.67758898 | 22.28653167 |
|       | 192.5532686 | 45.50400457 | 21.53089091 | 52.94106332 | 252.4165956 |
|       | 152.9052072 | 109.5758377 | 198.2817057 | 165.9539997 | 76.0826143  |
|       | 132.2193618 | 15969.53236 | 2349.595156 | 124.0396525 | 158.8890881 |
|       | 118.1030265 | 356.8836932 |             |             |             |
| CD1C  | 1349.225244 | 2899.133023 | 31.29737364 | 44.14189025 | 77.23468675 |
|       | 204.5100438 | 33.58018677 | 40.92391452 | 16.8510481  | 50.88172305 |
|       | 36.32319474 | 30.67802465 | 526.834127  | 29.85115497 | 22.85969301 |
|       | 167.5032595 | 9523.260691 | 1002.723527 | 32.85124884 | 34.92829111 |
|       | 24.63751709 | 258.2129965 |             |             |             |
| CD1D  | 243.5748238 | 416.3030749 | 201.5321093 | 16.92273192 | 30.19763591 |
|       | 10.79075018 | 6.357029724 | 48.61705515 | 52.42348265 | 288.6345968 |
|       | 16.24955986 | 17.37783232 | 2785.253606 | 49.35527967 | 373.0594532 |
|       | 39.50876033 | 90.82975345 | 51.31081795 | 69.97612949 | 23.92167028 |
|       | 51.54152805 | 136.9215217 |             |             |             |
| CD1E  | 53.25152761 | 49.96271254 | 49.27253115 | 52.56295023 | 80.73544092 |
|       | 55.87769713 | 33.11414254 | 61.98706623 | 75.82638966 | 32.86570534 |
|       | 53.71078497 | 34.07711005 | 91.10615096 | 48.57029757 | 40.47880872 |
|       | 112.6050172 | 8828.20894  | 1421.6131   | 49.95483864 | 51.76582224 |
|       | 49.63979787 | 41.44795696 |             |             |             |
| CD2   | 419.4350192 | 409.5822139 | 377.8722518 | 8182.951228 | 8002.722844 |
|       | 9578.936337 | 7866.426688 | 14057.43026 | 11226.69889 | 5897.393241 |

|        |             |             |             |             |             |
|--------|-------------|-------------|-------------|-------------|-------------|
|        | 6247.906848 | 3097.47128  | 222.357789  | 149.914948  | 112.6050172 |
|        | 188.1947985 | 187.6124847 | 146.9688776 | 332.6238386 | 138.5888054 |
|        | 614.9120433 | 576.8272959 |             |             |             |
| CD209  | 68.81156687 | 26.73032883 | 23.37353986 | 21.6089747  | 99.59399622 |
|        | 16.53368601 | 21.60591559 | 24.14453092 | 154.8153429 | 116.6935326 |
|        | 42.60499233 | 31.86953296 | 84.17376676 | 315.2176797 | 190.945084  |
|        | 2758.297802 | 2461.153302 | 228.3870623 | 66.9779578  | 173.3203491 |
|        | 91.6159891  | 130.8839822 |             |             |             |
| CD22   | 3293.629651 | 1803.150148 | 19.03486997 | 37.47048645 | 53.38200923 |
|        | 54.37437693 | 40.69767509 | 45.41225697 | 127.573896  | 80.6118876  |
|        | 41.94230156 | 32.52035914 | 31.15232509 | 153.7017175 | 62.36131967 |
|        | 221.7347708 | 154.8175221 | 36.801049   | 287.7290641 | 205.9169697 |
|        | 104.7638451 | 72.3215622  |             |             |             |
| CD244  | 59.70898915 | 38.51177638 | 28.83176888 | 623.6947469 | 174.4389829 |
|        | 69.11006059 | 23.25507848 | 123.3772483 | 85.18075466 | 1115.507714 |
|        | 1823.542464 | 1702.765135 | 828.4298346 | 22.32433652 | 46.7586588  |
|        | 96.28143387 | 23.85077614 | 18.38716012 | 105.2985222 | 38.33766231 |
|        | 2465.483607 | 51.86506899 |             |             |             |
| CD247  | 23.66779296 | 53.69027623 | 65.55259868 | 5508.526368 | 7038.536622 |
|        | 5318.708728 | 2156.371127 | 5302.661793 | 9743.994501 | 9129.432322 |
|        | 16099.47966 | 15108.26954 | 35.27406041 | 23.92868112 | 26.9337182  |
|        | 81.83870096 | 43.67897681 | 32.48553108 | 128.4661867 | 105.4058403 |
|        | 459.1326292 | 59.83784952 |             |             |             |
| CD27   | 388.8197482 | 4138.587476 | 7350.586942 | 5506.313911 | 4042.377012 |
|        | 4188.175594 | 1125.960048 | 5710.976341 | 6979.725316 | 2288.252945 |
|        | 196.4705551 | 127.3316351 | 136.4091916 | 90.85495783 | 137.4401366 |
|        | 136.436149  | 125.1576644 | 111.9872056 | 123.9116687 | 89.47064836 |
|        | 468.4975465 | 300.1045211 |             |             |             |
| CD28   | 170.6541081 | 183.9284292 | 145.7577865 | 527.4027958 | 462.9998637 |
|        | 961.774233  | 2294.871098 | 1326.705724 | 1614.199583 | 524.1543544 |
|        | 77.96041968 | 71.78378935 | 79.14901833 | 62.22720273 | 64.48080982 |
|        | 207.2614073 | 87.37183838 | 66.03630917 | 62.4258293  | 75.16641    |
|        | 89.18080942 | 177.5405702 |             |             |             |
| CD300A | 30.69853755 | 77.94519325 | 103.7065116 | 738.0313132 | 193.2963626 |
|        | 414.3723032 | 54.40588795 | 46.81934    | 84.09971859 | 2268.609727 |
|        | 5340.892712 | 4668.361682 | 2187.807203 | 691.3037154 | 211.1048289 |
|        | 1737.241257 | 59.48756952 | 26.19487356 | 777.7278706 | 1075.456564 |
|        | 2406.92936  | 4130.857899 |             |             |             |
| CD33   | 25.374709   | 16.71748672 | 29.48171985 | 21.33635265 | 17.83717204 |
|        | 11.69136762 | 10.49185361 | 16.00738743 | 55.45160433 | 146.4620047 |
|        | 13.328498   | 14.20413975 | 1494.400184 | 388.0381883 | 241.8450557 |
|        | 562.1160422 | 731.6958076 | 15.47840391 | 811.3522325 | 870.835795  |
|        | 36.39003364 | 36.74188801 |             |             |             |
| CD37   | 13247.62405 | 11610.29035 | 802.2248179 | 4472.430176 | 2997.964479 |
|        | 4287.536344 | 865.4159386 | 3602.317619 | 4831.809557 | 1823.236151 |
|        | 2090.502205 | 1604.568691 | 4508.112105 | 1453.500603 | 340.0169777 |
|        | 2337.797784 | 408.0617171 | 99.31070429 | 783.7092702 | 1104.720671 |

|        |             |             |             |             |             |
|--------|-------------|-------------|-------------|-------------|-------------|
|        | 1908.23192  | 3204.567177 |             |             |             |
| CD38   | 588.2648306 | 659.9477137 | 12117.94539 | 318.883456  | 296.2994306 |
|        | 205.305051  | 492.6276527 | 1145.360549 | 696.5074435 | 224.0112245 |
|        | 1418.265485 | 867.2194289 | 237.7018615 | 90.8542014  | 12009.36242 |
|        | 642.6104871 | 65.77761797 | 3371.628895 | 814.6736615 | 1366.953817 |
|        | 298.7045221 | 400.4888321 |             |             |             |
| CD3D   | 103.2248459 | 174.4025802 | 88.37677893 | 14396.85632 | 14916.803   |
|        | 12009.36242 | 7456.754789 | 18921.47848 | 12721.06851 | 11894.34724 |
|        | 250.8695535 | 243.8532814 | 79.18206065 | 74.30949816 | 26.01377304 |
|        | 12.22050099 | 106.1967153 | 132.5505719 | 40.77673955 | 13.20972496 |
|        | 795.027696  | 250.9974436 |             |             |             |
| CD3E   | 1233.172359 | 756.7993492 | 1163.254876 | 5787.182458 | 3554.437369 |
|        | 6370.192958 | 2850.795927 | 2993.594839 | 5302.45403  | 1748.883874 |
|        | 461.7145711 | 342.1231155 | 225.2808846 | 188.3816952 | 172.5351641 |
|        | 175.317922  | 195.4486787 | 276.20651   | 144.3993653 | 129.5942842 |
|        | 425.8648102 | 809.110134  |             |             |             |
| CD3G   | 55.98119171 | 87.6081271  | 31.36207011 | 3348.560467 | 2859.409338 |
|        | 3066.253514 | 1149.980649 | 2416.241107 | 1298.021187 | 1121.515185 |
|        | 252.9163802 | 117.4404361 | 31.97464945 | 31.47187386 | 22.5839555  |
|        | 15.49172903 | 29.83579519 | 38.2153575  | 19.63068007 | 17.90169501 |
|        | 114.9902097 | 160.0909817 |             |             |             |
| CD4    | 138.4573773 | 118.3512664 | 351.0163026 | 164.9509326 | 2495.269425 |
|        | 3710.379943 | 1725.414846 | 4363.016183 | 5524.681644 | 399.5375472 |
|        | 81.07568775 | 75.96955929 | 3343.906153 | 552.3052303 | 1574.336844 |
|        | 10105.34674 | 1340.751384 | 701.0986434 | 213.8663803 | 287.7837723 |
|        | 163.6390935 | 364.5571609 |             |             |             |
| CD40   | 1493.347557 | 1328.267122 | 838.3890443 | 203.0571538 | 119.8051169 |
|        | 168.9573287 | 169.3131278 | 129.5124355 | 338.6601465 | 269.4014427 |
|        | 164.1619074 | 204.8063535 | 298.5733076 | 1146.591678 | 12966.60573 |
|        | 643.639203  | 1598.408075 | 4943.303284 | 111.7010328 | 416.0597275 |
|        | 204.0560124 | 275.5927662 |             |             |             |
| CD40LG | 65.37231327 | 51.83259142 | 34.65893963 | 186.4853205 | 464.1789801 |
|        | 852.1721059 | 660.7418675 | 809.450384  | 31.04806788 | 449.7694466 |
|        | 29.30316525 | 52.25679554 | 24.75213495 | 29.86059304 | 26.39060217 |
|        | 32.06615205 | 20.16451827 | 16.89038862 | 15.73172412 | 21.43431914 |
|        | 36.42693635 | 51.29818379 |             |             |             |
| CD5    | 482.7709118 | 212.2007839 | 459.3251879 | 947.6570017 | 1101.084704 |
|        | 1734.374565 | 918.9690411 | 1464.692495 | 3513.782725 | 508.249512  |
|        | 283.2620394 | 201.6701633 | 312.9288878 | 259.243454  | 285.0923469 |
|        | 188.25878   | 270.5730739 | 259.6191632 | 182.0748079 | 219.5267689 |
|        | 296.9402652 | 223.7346793 |             |             |             |
| CD6    | 75.85653173 | 91.34978305 | 295.0724091 | 1720.140098 | 738.2321164 |
|        | 3148.85189  | 2731.999076 | 1835.581311 | 2092.360886 | 342.3979908 |
|        | 623.8033823 | 348.4243243 | 90.96996824 | 94.71792103 | 137.1320082 |
|        | 88.93386715 | 96.80906697 | 90.20058102 | 41.95697606 | 41.71625038 |
|        | 329.7270655 | 155.6335945 |             |             |             |
| CD68   | 3.286119074 | 8.41213334  | 9.182953598 | 51.10845475 | 21.15896542 |

|       |              |              |                         |              |              |
|-------|--------------|--------------|-------------------------|--------------|--------------|
|       | 15. 76945271 | 30. 90820518 | 26. 97070262            | 23. 8360063  | 97. 22500992 |
|       | 93. 83368418 | 13. 92293323 | 806. 3047213            | 1705. 45606  | 748. 5959447 |
|       | 2770. 911453 | 1137. 825995 | 687. 7634179            | 172. 4465903 | 226. 1109905 |
|       | 45. 59685457 | 36. 20155225 |                         |              |              |
| CD69  | 8246. 962733 | 5037. 059721 | 131. 1507128            | 3798. 407191 | 4397. 041606 |
|       | 5489. 202469 | 1071. 887678 | 6081. 160743            | 539. 3938343 | 4572. 324665 |
|       | 1781. 265844 | 5471. 704926 | 66. 10288756            | 31. 65121441 | 59. 02137051 |
|       | 28. 81247015 | 39. 31238934 | 69. 45698718            | 440. 3983738 | 1484. 634024 |
|       | 6363. 149838 | 436. 4221698 |                         |              |              |
| CD7   | 15. 62904812 | 17. 28012062 | 18. 02258618            | 2234. 707961 | 2032. 402798 |
|       | 1507. 773715 | 1271. 833268 | 2132. 53501             | 7917. 977191 | 415. 8325753 |
|       | 1666. 682281 | 2106. 83981  | 20. 48373388            | 16. 0113349  | 13. 36812571 |
|       | 80. 61769372 | 27. 07256267 | 22. 00857195            | 12. 17345488 | 20. 04765141 |
|       | 48. 57212298 | 25. 19240764 |                         |              |              |
| CD70  | 294. 6566184 | 647. 9228093 | 528. 1256069            | 247. 6214563 | 116. 5526077 |
|       | 266. 2959935 | 388. 2749858 | 214. 2359544            | 1999. 95277  | 301. 4293391 |
|       | 226. 6449338 | 186. 4718703 | 189. 6644237            | 162. 091307  | 365. 3486293 |
|       | 116. 8363113 | 163. 5181238 | 705. 6011675            | 205. 9889771 | 115. 0885118 |
|       | 280. 4419984 | 309. 3411047 |                         |              |              |
| CD72  | 1434. 004736 | 194. 0589782 | 8. 359413914            | 18. 8127059  | 43. 04528298 |
|       | 8. 195551244 | 15. 72935292 | 10. 23080265            | 37. 64694269 | 11. 4839684  |
|       | 67. 34451995 | 21. 03489045 | 9. 096324111            | 9. 476286725 | 9. 588069329 |
|       | 123. 9520803 | 24. 27133459 | 8. 05889839             | 6. 665661843 | 15. 55213132 |
|       | 13. 37742609 | 9. 272238244 |                         |              |              |
| CD79A | 12117. 94539 | 9835. 923    | 3860. 541888            | 425. 4456431 | 183. 3771612 |
|       | 161. 6033691 | 97. 84605147 | 437. 0541054            | 424. 1217962 | 196. 7666923 |
|       | 149. 4947867 | 139. 2030869 | 174. 974517             | 124. 5658582 | 108. 8170218 |
|       | 63. 57950923 | 138. 9136781 | 189. 639752             | 61. 91581828 | 118. 775806  |
|       | 511. 4149111 | 261. 960019  |                         |              |              |
| CD79B | 5975. 189254 | 4719. 84198  | 900. 5698225            | 229. 2346632 | 284. 1304512 |
|       | 341. 3861217 | 192. 0177626 | 425. 1070045            | 863. 4669544 | 277. 8145759 |
|       | 364. 2599841 | 254. 4761746 | 158. 7986952            | 68. 04622904 | 64. 07909887 |
|       | 79. 32420695 | 61. 59710526 | 72. 14957289            | 38. 49728027 | 61. 7152637  |
|       | 209. 7392117 | 232. 5557133 |                         |              |              |
| CD80  | 131. 2576257 | 345. 1713796 | 367. 1492638            | 73. 52859919 | 102. 0859478 |
|       | 92. 39233333 | 195. 416557  | 109. 7080589            | 392. 7464198 | 196. 5982704 |
|       | 163. 1921911 | 139. 2568175 | 148. 4294518            | 350. 482739  | 3650. 811207 |
|       | 160. 4810794 | 596. 4318172 | 4526. 24129             | 120. 790446  | 177. 1857239 |
|       | 109. 740993  | 132. 6404432 |                         |              |              |
| CD86  | 354. 7433616 | 599. 8609321 | 309. 4183226            | 108. 8922088 | 35. 145174   |
|       | 95. 47693449 | 90. 30112485 | 29. 58459024            | 176. 4166456 | 341. 3536821 |
|       | 110. 1384066 | 87. 77041198 | 1398. 4001 764. 4811798 | 1444. 502959 |              |
|       | 2791. 659069 | 1729. 206247 | 4490. 947531            | 161. 7655034 | 203. 6194781 |
|       | 107. 8833958 | 161. 5053365 |                         |              |              |
| CD8A  | 564. 4780916 | 348. 1087905 | 44. 21285974            | 9990. 737125 | 41. 07506248 |
|       | 147. 1712529 | 161. 1817391 | 172. 4731305            | 80. 70305906 | 1127. 953469 |
|       | 959. 5951565 | 1190. 400365 | 203. 576442             | 135. 9847653 | 45. 89341104 |

|         |             |             |             |             |             |
|---------|-------------|-------------|-------------|-------------|-------------|
|         | 63.47614462 | 176.6671569 | 163.4447696 | 87.086495   | 102.8346227 |
|         | 176.3456177 | 623.2298556 |             |             |             |
| CD8B    | 21.53089091 | 18.55930203 | 22.19126923 | 3697.963718 | 143.5770588 |
|         | 16.54639136 | 12.46145751 | 118.4547967 | 12.43551104 | 108.6995574 |
|         | 20.09303314 | 16.68319539 | 14.49443263 | 14.7839247  | 9.306658239 |
|         | 9.973398059 | 14.20160728 | 13.49794899 | 9.973784848 | 10.95016398 |
|         | 33.0054369  | 31.43329135 |             |             |             |
| CD96    | 140.0696821 | 182.4215585 | 83.87781162 | 1718.974851 | 1432.94769  |
|         | 1571.924274 | 253.7390252 | 473.0050907 | 2933.320651 | 3005.007369 |
|         | 1629.78438  | 2127.768209 | 35.69766875 | 37.23265829 | 64.30250203 |
|         | 32.94807285 | 50.26149649 | 56.78650106 | 103.3665611 | 42.58554439 |
|         | 433.031001  | 90.84379933 |             |             |             |
| CDA     | 7.453474496 | 8.282139574 | 18.8378526  | 10.06514533 | 9.6818797   |
|         | 14.73210587 | 10.15946955 | 10.55001689 | 11.57836151 | 167.1780478 |
|         | 98.13957615 | 8.147551977 | 1040.419935 | 346.9958858 | 8.817496805 |
|         | 28.81247015 | 343.4091893 | 36.03732383 | 88.0510502  | 82.11698268 |
|         | 346.4833211 | 3592.43191  |             |             |             |
| CDC25A  | 14.44417944 | 13.22104832 | 18.49909288 | 9.90420085  | 13.45315049 |
|         | 9.040054131 | 226.961818  | 31.42579269 | 29.61784034 | 25.27567657 |
|         | 13.26647127 | 142.2923317 | 14.74858062 | 18.97174653 | 22.0447246  |
|         | 14.74324112 | 14.79591225 | 12.77212168 | 27.83891458 | 74.24230416 |
|         | 14.87374833 | 17.78100586 |             |             |             |
| CDH12   | 10.62580967 | 18.14764196 | 6.994769751 | 7.907398998 | 7.285693652 |
|         | 8.59290329  | 20.54473142 | 9.729238863 | 130.5611509 | 197.4542946 |
|         | 27.0789387  | 9.729238863 | 9.440421022 | 12.70746733 | 12.51970773 |
|         | 9.085608856 | 33.16857129 | 23.20574621 | 84.74034858 | 38.3494807  |
|         | 62.3285341  | 24.73256754 |             |             |             |
| CDHR1   | 15.70334805 | 21.35717484 | 8.220261044 | 32.70000097 | 86.84214478 |
|         | 12.73061175 | 27.50039747 | 22.14183418 | 7.934015528 | 130.6180895 |
|         | 237.0997067 | 29.5032353  | 10.5027912  | 9.74632817  | 9.294987078 |
|         | 23.8492483  | 6.785695372 | 8.710620771 | 19.2193508  | 11.06215587 |
|         | 8.510053764 | 27.59515717 |             |             |             |
| CDK6    | 30.69853755 | 23.04874713 | 15.94453415 | 65.1412171  | 25.78013421 |
|         | 99.98686977 | 45.35113413 | 24.21507209 | 69.53996611 | 24.45714861 |
|         | 27.05878945 | 289.5847031 | 21.06647043 | 23.49923645 | 16.71107549 |
|         | 12.82579482 | 75.85179982 | 67.41087913 | 47.96802384 | 14.10751406 |
|         | 64.38971117 | 19.40986991 |             |             |             |
| CEACAM3 | 68.46140597 | 61.8011542  | 104.89154   | 69.08981156 | 59.64008096 |
|         | 55.44751849 | 46.69869297 | 65.12057481 | 133.397401  | 120.6353537 |
|         | 189.912654  | 109.5758377 | 242.1017704 | 156.08054   | 123.6149862 |
|         | 113.8352122 | 147.5042141 | 210.180427  | 186.2935686 | 166.5230648 |
|         | 132.0579064 | 2096.525977 |             |             |             |
| CEACAM8 | 77.91715796 | 86.88656507 | 22.74378501 | 143.8250498 | 7.285693652 |
|         | 73.7311384  | 35.28849776 | 4.767545237 | 39.35635057 | 15.77579613 |
|         | 956.067675  | 162.1045877 | 6.650645086 | 5.093941607 | 14.10673265 |
|         | 11.65755142 | 14.18862492 | 19.05023187 | 2385.025776 | 1835.208959 |
|         | 235.2654646 | 149.8673485 |             |             |             |

|         |             |             |             |             |             |
|---------|-------------|-------------|-------------|-------------|-------------|
| CEMP1   | 28.85299608 | 26.05680615 | 5.783504523 | 9.51802003  | 44.87716404 |
|         | 8.245074698 | 8.750532337 | 66.92570007 | 210.0815605 | 135.6592715 |
|         | 24.7914552  | 47.37880726 | 12.41773777 | 13.43483203 | 19.10532833 |
|         | 44.64572595 | 6.045328615 | 7.792685483 | 11.22269837 | 40.31486949 |
|         | 54.48869834 | 30.29430793 |             |             |             |
| CFP     | 4.573719127 | 4.646460043 | 5.382740888 | 14.38688428 | 371.8319741 |
|         | 50.46125007 | 5.783504523 | 13.9469182  | 47.25871943 | 471.1297374 |
|         | 33.99443636 | 6.982740503 | 3702.502521 | 27.13104189 | 219.1912001 |
|         | 1971.112539 | 7.548560149 | 451.2500358 | 47.82909649 | 214.9062825 |
|         | 14.58477024 | 2060.180409 |             |             |             |
| CHI3L1  | 9.040054131 | 10.11185342 | 10.0823446  | 13.16060514 | 12.37533181 |
|         | 7.285693652 | 12.94364358 | 9.949791059 | 19.88900634 | 16.32499594 |
|         | 344.721706  | 59.67623931 | 12.16796964 | 8959.873277 | 3395.663462 |
|         | 2050.816822 | 89.88071419 | 473.9150298 | 477.0548529 | 636.7916524 |
|         | 89.33007873 | 3791.328311 |             |             |             |
| CHI3L2  | 574.7325605 | 445.1279343 | 320.5064848 | 362.8779127 | 662.9063033 |
|         | 312.1882039 | 166.1811986 | 4770.057676 | 515.3473004 | 404.1369074 |
|         | 322.0390633 | 170.2202856 | 200.9927361 | 181.8142129 | 1765.552386 |
|         | 175.3835932 | 184.1091199 | 210.5699575 | 148.963857  | 171.1295117 |
|         | 317.4730696 | 356.9094548 |             |             |             |
| CHST15  | 375.0617962 | 380.4544171 | 2248.878473 | 37.3682688  | 56.31496953 |
|         | 41.68602369 | 34.12601784 | 41.65976896 | 82.84147995 | 339.1261865 |
|         | 43.29669296 | 21.63834323 | 3334.89402  | 1452.251166 | 103.4871553 |
|         | 1051.6856   | 317.7544695 | 99.79101855 | 1121.27006  | 895.2054973 |
|         | 1106.193591 | 4602.158626 |             |             |             |
| CHST7   | 15.2998514  | 17.07503774 | 105.3543147 | 26.28908826 | 70.20092794 |
|         | 367.4048158 | 234.0049091 | 401.8384715 | 78.75058598 | 56.03427065 |
|         | 29.82523398 | 23.03809769 | 291.0641772 | 314.6462296 | 350.8883739 |
|         | 421.2349567 | 193.2489244 | 3085.840231 | 152.218479  | 368.050649  |
|         | 27.24137463 | 793.1481128 |             |             |             |
| CLC     | 317.0133169 | 263.8099578 | 158.2726851 | 91.38509289 | 21.54663623 |
|         | 110.2519917 | 184.5831263 | 91.98053835 | 38.52410842 | 337.9147534 |
|         | 509.9159527 | 237.9275689 | 86.56595204 | 69.27115976 | 226.7134742 |
|         | 172.4089256 | 98.81299309 | 102.2341069 | 3917.54615  | 3098.629915 |
|         | 26617.23891 | 4605.247829 |             |             |             |
| CLCA3P  | 17.20651635 | 25.26232098 | 11.94994798 | 10.28448645 | 11.3209152  |
|         | 2.307902038 | 0.972464723 | 4.366178616 | 10.45160006 | 25.67823744 |
|         | 4.29075067  | 1.761755136 | 2.691185739 | 2.022563272 | 0.251594145 |
|         | 9.029403736 | 2.311940973 | 0.758567527 | 5.985711194 | 5.420513422 |
|         | 18.88573028 | 6.90793389  |             |             |             |
| CLEC10A | 110.2519917 | 95.48720378 | 67.3906821  | 80.05432796 | 56.97214117 |
|         | 77.30955315 | 36.92529104 | 66.46616213 | 123.3530513 | 154.0857258 |
|         | 56.08638386 | 61.70274209 | 481.4264713 | 159.5970517 | 69.39655423 |
|         | 5770.127086 | 5129.9883   | 145.4750722 | 107.2146881 | 150.2976889 |
|         | 35.23355032 | 145.6285415 |             |             |             |
| CLEC2D  | 1012.819733 | 595.0445595 | 134.5503286 | 1510.850313 | 1443.461253 |
|         | 1711.865828 | 1875.9525   | 1689.599596 | 2808.690677 | 332.2360807 |

|        |             |             |             |             |             |
|--------|-------------|-------------|-------------|-------------|-------------|
|        | 979.2239401 | 344.4100434 | 93.13451585 | 78.64035879 | 1465.741277 |
|        | 187.9865712 | 66.49062417 | 2002.179445 | 45.51634127 | 41.11000417 |
|        | 92.59123087 | 68.77784236 |             |             |             |
| CLEC4A | 270.684059  | 105.2173251 | 19.48358652 | 43.67169279 | 94.87431986 |
|        | 19.995556   | 35.566978   | 67.3906821  | 75.54705953 | 326.2228204 |
|        | 66.20219764 |             |             |             |             |
|        | 39.06798479 | 2802.254283 | 1137.937654 | 51.67871576 | 6742.94324  |
|        | 4209.628791 | 558.9934716 | 321.2172134 | 548.5828994 | 234.9146008 |
|        | 2814.377261 |             |             |             |             |
| CLEC7A | 148.8556127 | 142.0062175 | 58.64250526 | 86.04241069 | 106.6702025 |
|        | 89.98404196 | 50.52462737 | 936.3792246 | 94.16503856 | 628.3365071 |
|        | 143.1492688 | 89.37299011 | 6165.953009 | 3760.306028 | 283.2038076 |
|        | 3071.447657 | 5359.771755 | 1178.503785 | 634.4501909 | 1330.094243 |
|        | 159.5272392 | 5247.49398  |             |             |             |
| CLIC2  | 8.195551244 | 7.671472425 | 116.2438106 | 6.339831804 | 11.06762282 |
|        | 4.799625554 | 7.65617701  | 5.412216318 | 6.36193044  | 14.6317676  |
|        | 24.68882499 | 30.3854209  | 103.5590934 | 437.0461122 | 1393.382865 |
|        | 2233.164343 | 2244.054642 | 5239.88349  | 8.029450285 | 36.79183022 |
|        | 8.446042556 | 10.41872533 |             |             |             |
| CMA1   | 77.95639785 | 68.10609278 | 75.6389405  | 25.22954469 | 42.09518393 |
|        | 46.6365232  | 76.31621718 | 29.75313496 | 40.08632954 | 77.40398982 |
|        | 57.33259038 | 53.020637   | 58.76829357 | 46.37300953 | 65.76280884 |
|        | 64.11513732 | 44.7774243  | 53.12239382 | 1378.879998 | 1622.195863 |
|        | 164.6813549 | 48.25538871 |             |             |             |
| COL8A2 | 135.2230196 | 73.45098986 | 23.48774462 | 60.53487072 | 79.43023238 |
|        | 61.77215124 | 55.34420893 | 62.18440951 | 122.1817822 | 76.59825958 |
|        | 88.02552084 | 68.46140597 | 275.8747733 | 1233.715268 | 33.84353695 |
|        | 151.5623553 | 129.2643777 | 109.1988225 | 70.07666952 | 59.73326622 |
|        | 89.9998803  | 186.4210163 |             |             |             |
| COLQ   | 28.85299608 | 27.39812397 | 23.55278029 | 152.7740895 | 66.85032911 |
|        | 135.3256446 | 36.18719498 | 48.33458991 | 163.7532278 | 410.2594987 |
|        | 406.5670516 | 351.0163026 | 33.83180651 | 24.84089345 | 86.1812316  |
|        | 128.1562926 | 31.5991765  | 20.18679185 | 51.67336008 | 36.89214997 |
|        | 27.50524235 | 40.46415035 |             |             |             |
| CPA3   | 786.5967435 | 653.570348  | 431.8870773 | 147.6958112 | 25.20265438 |
|        | 243.2991012 | 226.7134742 | 148.1833551 | 145.5265348 | 271.5067499 |
|        | 458.1363071 | 308.1273629 | 135.1465191 | 139.386735  | 247.6828366 |
|        | 206.9088618 | 132.4987072 | 149.4195584 | 28290.30984 | 22328.97153 |
|        | 1091.417527 | 522.5988941 |             |             |             |
| CR2    | 1471.268235 | 559.6347831 | 139.9135207 | 245.2703384 | 285.69747   |
|        | 67.24739132 | 17.8883765  | 25.49933683 | 25.46161624 | 22.26236223 |
|        | 25.27012551 | 64.40632604 | 35.1557773  | 27.25115703 | 55.67688175 |
|        | 39.48271435 | 16.28183461 | 51.3593367  | 16.71082041 | 16.32654871 |
|        | 122.0795542 | 33.0622167  |             |             |             |
| CREB5  | 30.97425375 | 24.5582079  | 32.02053189 | 12.41011504 | 43.39553244 |
|        | 7.370460489 | 10.97804588 | 9.555358782 | 9.368720456 | 15.69291933 |
|        | 13.03890087 | 14.41666747 | 360.9106341 | 22.86410106 | 11.76274946 |
|        | 59.21766228 | 227.5494335 | 257.4524083 | 23.96095789 | 23.33830393 |

|        |              |              |              |              |              |
|--------|--------------|--------------|--------------|--------------|--------------|
|        | 15. 15801623 | 1385. 315828 |              |              |              |
| CRISP3 | 27. 37818895 | 16. 54772888 | 6. 508150101 | 3. 235495107 | 4. 203532154 |
|        | 7. 582193721 | 10. 20717886 | 5. 210162458 | 647. 7895425 | 34. 44926679 |
|        | 164. 0262277 | 41. 73838224 | 5. 032005451 | 11. 29862608 | 10. 66334011 |
|        | 5. 556158206 | 5. 950386602 | 5. 355044803 | 140. 2065177 | 33. 50781403 |
|        | 75. 7877931  | 15. 93701737 |              |              |              |
| CRTAM  | 54. 88908823 | 66. 10701896 | 54. 0562838  | 1443. 48038  | 308. 5611006 |
|        | 114. 0594238 | 661. 2766113 | 42. 15294578 | 47. 76902833 | 829. 6692685 |
|        | 261. 1619294 | 652. 8575264 | 212. 0416867 | 761. 03216   | 38. 22269719 |
|        | 85. 70898291 | 128. 6403474 | 153. 9609051 | 15. 54962061 | 106. 1592663 |
|        | 78. 33058859 | 83. 96491114 |              |              |              |
| CRYBB1 | 8. 51087882  | 9. 160277762 | 16. 77479438 | 8. 78944775  | 20. 22798354 |
|        | 10. 6390921  | 8. 277095789 | 10. 18494196 | 10. 55258875 | 7. 618702951 |
|        | 9. 40235754  | 7. 972776848 | 9. 396148118 | 9. 70690203  | 12. 12718124 |
|        | 166. 9553981 | 9. 016747265 | 8. 796010004 | 38. 37689323 | 16. 78915846 |
|        | 9. 497994228 | 9. 876168345 |              |              |              |
| CSF1   | 22. 1078749  | 21. 81521667 | 14. 62640697 | 22. 99418539 | 21. 94024148 |
|        | 32. 27097928 | 235. 5590589 | 24. 17762134 | 159. 729662  | 39. 12354971 |
|        | 21. 72047615 | 24. 48518696 | 24. 56893179 | 687. 8844582 | 35. 28849776 |
|        | 23. 12217296 | 112. 5821168 | 93. 53462038 | 28. 21718786 | 61. 84446433 |
|        | 73. 59342702 | 22. 5275051  |              |              |              |
| CSF2   | 24. 24874392 | 18. 24411695 | 43. 36581215 | 24. 4197256  | 40. 95236426 |
|        | 25. 87142267 | 1283. 451966 | 22. 7587994  | 16. 26218479 | 62. 26959997 |
|        | 47. 27814858 | 741. 3146239 | 27. 09459243 | 28. 52989192 | 18. 82453343 |
|        | 16. 29360796 | 34. 06423073 | 38. 03034172 | 29. 73723499 | 1722. 887037 |
|        | 20. 96429003 | 19. 5960694  |              |              |              |
| CSF3R  | 99. 76628743 | 29. 61360061 | 22. 72781743 | 24. 3859179  | 107. 0724606 |
|        | 36. 16508067 | 25. 6594246  | 38. 93185048 | 85. 4433645  | 338. 8415636 |
|        | 115. 6437107 | 45. 2333023  | 2331. 948628 | 214. 3427639 | 860. 3372222 |
|        | 737. 8599039 | 92. 48429351 | 67. 25193329 | 186. 0953351 | 212. 2561883 |
|        | 248. 3966271 | 9175. 361959 |              |              |              |
| CST7   | 29. 71165699 | 21. 33475082 | 14. 02145998 | 5181. 597893 | 197. 8545424 |
|        | 1470. 064999 | 746. 2695012 | 322. 0620463 | 1323. 231227 | 12102. 63842 |
|        | 11514. 68497 | 10179. 78364 | 63. 6732263  | 254. 880064  | 186. 8061087 |
|        | 292. 5617552 | 1490. 444911 | 4059. 440795 | 2285. 360966 | 2487. 597945 |
|        | 616. 2101884 | 2347. 728878 |              |              |              |
| CTLA4  | 19. 39158332 | 12. 05483904 | 12. 39999002 | 19. 09265901 | 282. 3095234 |
|        | 606. 1036832 | 1865. 797683 | 2019. 936149 | 4077. 44587  | 22. 98413575 |
|        | 11. 01469755 | 18. 71219759 | 18. 619765   | 14. 31666435 | 8. 580759955 |
|        | 18. 03666634 | 16. 48246747 | 12. 49357301 | 18. 08044096 | 14. 80064982 |
|        | 62. 02243666 | 38. 69364838 |              |              |              |
| CTSG   | 247. 7712501 | 204. 7033855 | 205. 3757047 | 113. 3980465 | 134. 4958651 |
|        | 81. 23896111 | 73. 69460204 | 38. 09184417 | 224. 9735167 | 156. 8702985 |
|        | 309. 0786617 | 105. 3144058 | 88. 12615549 | 65. 31852439 | 88. 66013895 |
|        | 141. 0660169 | 69. 98276175 | 42. 00016699 | 5638. 069687 | 5475. 90797  |
|        | 137. 176414  | 185. 0082007 |              |              |              |
| CTSW   | 16. 65790643 | 14. 10507421 | 16. 31812595 | 4894. 215252 | 487. 0683652 |



|        |             |             |             |             |             |
|--------|-------------|-------------|-------------|-------------|-------------|
|        | 963.2767736 | 23.08754551 | 14.6382422  | 12.83317361 | 4144.004572 |
|        | 6980.778276 | 10811.41236 | 16.93731154 | 15.94992913 | 13.08202394 |
|        | 26.76355546 | 16.23954329 | 15.8711173  | 119.4688824 | 272.4656742 |
|        | 41.78979254 | 20.49140221 |             |             |             |
| CXCL10 | 761.3944185 | 395.6381026 | 246.2438258 | 157.22658   | 120.4987696 |
|        | 152.9758784 | 529.512254  | 127.9224652 | 256.6183684 | 488.5453368 |
|        | 201.1109308 | 1510.914551 | 500.9300164 | 163.1981892 | 31273.67963 |
|        | 278.3434035 | 163.7176364 | 11302.3948  | 112.8085953 | 313.9187307 |
|        | 332.722032  | 486.9671286 |             |             |             |
| CXCL11 | 90.26229276 | 71.79483122 | 44.79050636 | 22.77124293 | 6.633637977 |
|        | 14.33061258 | 52.00544678 | 23.48774462 | 42.51314662 | 42.34729139 |
|        | 28.53859717 | 183.3079432 | 38.41873667 | 16.90510228 | 9059.841342 |
|        | 29.35940998 | 21.12034731 | 3956.496269 | 27.84781811 | 33.7735536  |
|        | 33.86659948 | 74.22060498 |             |             |             |
| CXCL13 | 50.1800947  | 22.77083572 | 17.24705732 | 22.35743472 | 6.024967349 |
|        | 8.95713845  | 280.5297599 | 9578.936337 | 13.50429071 | 7.577261926 |
|        | 10.02644064 | 16.12512522 | 10.31783604 | 11.75346746 | 627.930517  |
|        | 16.76076868 | 12.71410384 | 20.93152388 | 25.70939324 | 10.94557061 |
|        | 11.1092851  | 29.79046571 |             |             |             |
| CXCL3  | 73.07039801 | 28.30659504 | 56.44753053 | 26.71170482 | 17.02062149 |
|        | 30.02788375 | 26.84183085 | 27.69750654 | 136.6242482 | 45.90656617 |
|        | 17.38441257 | 30.21807353 | 175.8826199 | 1496.816    | 271.246673  |
|        | 233.3303549 | 81.03679349 | 157.0218318 | 149.9605608 | 7936.428599 |
|        | 44.00159828 | 75.7691719  |             |             |             |
| CXCL5  | 94.16490321 | 83.04902879 | 43.36581215 | 18.42018765 | 7.759898576 |
|        | 41.21600403 | 24.94052208 | 18.93654262 | 73.85830951 | 78.88888206 |
|        | 25.08008077 | 29.07388553 | 32.93471403 | 5315.265079 | 91.98053835 |
|        | 46.38135018 | 37.39284051 | 387.4036234 | 49.57406448 | 621.7471315 |
|        | 29.25747912 | 69.6139163  |             |             |             |
| CXCL9  | 597.5841917 | 438.2088306 | 268.3992061 | 125.8362376 | 77.45884479 |
|        | 151.5042347 | 259.4612394 | 143.5770588 | 159.2182742 | 220.9114526 |
|        | 186.9242102 | 590.3615841 | 265.0825127 | 168.4971354 | 38944.01868 |
|        | 199.4359175 | 179.9813131 | 2918.819703 | 123.5555835 | 99.76021313 |
|        | 193.9209434 | 403.0543959 |             |             |             |
| CXCR1  | 260.5780432 | 187.0592932 | 146.6778838 | 214.6841388 | 320.9597732 |
|        | 253.8205315 | 76.35489937 | 71.48534098 | 216.8895181 | 691.7310759 |
|        | 515.9159844 | 417.1870896 | 82.78141165 | 72.0058534  | 61.26982624 |
|        | 53.22101207 | 65.52991342 | 64.12271586 | 263.7886674 | 267.9679786 |
|        | 239.4764818 | 5613.081304 |             |             |             |
| CXCR2  | 26.76355546 | 12.64597482 | 20.8510013  | 73.61765642 | 5.107669662 |
|        | 20.88194891 | 7.644655016 | 11.15831089 | 62.58074509 | 341.3628029 |
|        | 963.1701029 | 280.0023863 | 408.3528365 | 115.5505074 | 174.1206652 |
|        | 64.07909887 | 176.8360878 | 48.42702155 | 126.093962  | 56.93465721 |
|        | 442.7589038 | 17610.41012 |             |             |             |
| CXCR5  | 368.7814351 | 298.694373  | 10.14786303 | 32.70801147 | 29.79215867 |
|        | 181.8245372 | 207.1265648 | 2508.080521 | 32.4851772  | 31.93919539 |
|        | 16.03380756 | 15.13101608 | 14.61246054 | 17.36373676 | 212.2750073 |

|         |              |              |              |              |              |
|---------|--------------|--------------|--------------|--------------|--------------|
|         | 14. 43114488 | 17. 53626408 | 26. 90915848 | 13. 73208623 | 18. 88504854 |
|         | 55. 85644925 | 19. 29227122 |              |              |              |
| CXCR6   | 143. 966553  | 137. 922284  | 129. 4184927 | 239. 577985  | 92. 27701669 |
|         | 190. 1248095 | 1140. 294509 | 187. 5232686 | 914. 3089198 | 1037. 795776 |
|         | 175. 2851029 | 139. 1507517 | 89. 88376184 | 60. 50454252 | 68. 56018671 |
|         | 56. 08489855 | 61. 54906754 | 93. 76432338 | 58. 16905397 | 53. 14506673 |
|         | 86. 73337152 | 166. 6014244 |              |              |              |
| CXorf57 | 39. 26542516 | 19. 44447612 | 10. 62580967 | 102. 1724937 | 236. 7644719 |
|         | 111. 2439257 | 152. 5108229 | 14. 24242632 | 12. 49889885 | 284. 2716475 |
|         | 54. 61125396 | 77. 38738398 | 8. 024895821 | 11. 29730888 | 6. 694465385 |
|         | 10. 44585498 | 7. 429375053 | 5. 419912679 | 7. 400067061 | 6. 598985716 |
|         | 73. 86823463 | 12. 15912559 |              |              |              |
| CYP27A1 | 28. 17031886 | 29. 93010894 | 40. 80982734 | 35. 11559608 | 57. 08079673 |
|         | 18. 92107732 | 20. 98904773 | 60. 30106853 | 55. 89770913 | 88. 19698455 |
|         | 36. 91521067 | 30. 40510025 | 761. 5963848 | 9212. 241151 | 72. 62100796 |
|         | 75. 71085354 | 807. 5821247 | 1970. 12216  | 731. 4259977 | 853. 0000301 |
|         | 71. 57804711 | 52. 96843829 |              |              |              |
| CYP27B1 | 839. 568697  | 393. 1234511 | 544. 7418911 | 123. 385104  | 89. 21509024 |
|         | 112. 6050172 | 253. 1007469 | 62. 71521001 | 451. 157092  | 198. 9157769 |
|         | 95. 8119075  | 117. 9119847 | 96. 6530619  | 1182. 186949 | 6662. 564771 |
|         | 145. 7011205 | 203. 4468878 | 2253. 07628  | 88. 73893452 | 231. 5401669 |
|         | 179. 3795601 | 291. 0919657 |              |              |              |
| DACH1   | 8. 110268958 | 6. 614252509 | 7. 019305551 | 6. 072925338 | 26. 64846634 |
|         | 6. 332890006 | 3. 990985982 | 4. 929861418 | 16. 74879697 | 14. 24749768 |
|         | 34. 41652414 | 18. 5565618  | 63. 04081707 | 7. 182118842 | 4. 273621867 |
|         | 8. 23248634  | 5. 418450145 | 6. 024269222 | 30. 55282309 | 11. 69596161 |
|         | 232. 9448016 | 80. 62449793 |              |              |              |
| DAPK2   | 50. 49233083 | 52. 66107689 | 24. 63126285 | 36. 778245   | 35. 93880485 |
|         | 53. 08765217 | 21. 06633463 | 20. 19963341 | 71. 83050785 | 55. 81143763 |
|         | 75. 19081972 | 65. 98252315 | 50. 3687963  | 36. 29552204 | 35. 145174   |
|         | 76. 65867431 | 50. 65432393 | 57. 82502739 | 260. 2593867 | 126. 5670604 |
|         | 1104. 766554 | 494. 7641499 |              |              |              |
| DCSTAMP | 38. 69538004 | 19. 46232551 | 134. 084158  | 45. 95452314 | 33. 84353695 |
|         | 19. 29191355 | 61. 87372226 | 68. 52517722 | 60. 49713226 | 77. 66579469 |
|         | 39. 23336722 | 85. 31836726 | 100. 3959971 | 3167. 902414 | 171. 5562529 |
|         | 278. 806442  | 919. 9504445 | 632. 4755841 | 126. 0151417 | 250. 4705436 |
|         | 145. 246652  | 90. 65655649 |              |              |              |
| DEFA4   | 364. 8313155 | 262. 8085775 | 213. 2412028 | 580. 4081606 | 61. 9081487  |
|         | 252. 1933458 | 165. 640875  | 89. 90011254 | 42. 80616145 | 290. 2323357 |
|         | 3153. 504694 | 224. 7841847 | 108. 489886  | 59. 8115536  | 76. 11959313 |
|         | 88. 37677893 | 79. 53417974 | 104. 1710485 | 246. 9127303 | 174. 0874482 |
|         | 885. 3172017 | 453. 7054493 |              |              |              |
| DENND5B | 47. 963256   | 82. 49743428 | 338. 5948695 | 4. 937003728 | 5. 354735415 |
|         | 6. 171513508 | 8. 639430617 | 2. 140728959 | 35. 50090535 | 5. 928172884 |
|         | 28. 75548047 | 4. 929861418 | 5. 019653713 | 14. 58676995 | 7. 808323788 |
|         | 36. 71555117 | 12. 87739467 | 28. 44840466 | 6. 111045892 | 12. 88881259 |
|         | 9. 439454235 | 11. 06939913 |              |              |              |

|        |             |             |             |             |             |
|--------|-------------|-------------|-------------|-------------|-------------|
| DEPDC5 | 23.00370479 | 33.44683221 | 30.00802014 | 42.10826584 | 192.0177626 |
|        | 41.85091261 | 38.53463959 | 136.4948062 | 91.68554625 | 53.64503254 |
|        | 74.53481103 | 143.2597854 | 40.17793365 | 96.61739385 | 168.2830482 |
|        | 190.192431  | 106.0520414 | 38.1781776  | 110.3343475 | 32.01670875 |
|        | 572.5456158 | 27.33916292 |             |             |             |
| DGKA   | 426.967722  | 460.0096029 | 200.6236992 | 2223.016764 | 3066.253514 |
|        | 2690.021108 | 845.8491856 | 3860.541888 | 2953.650091 | 550.2709334 |
|        | 393.4296648 | 301.113803  | 300.9545855 | 170.0857145 | 169.0248855 |
|        | 215.9013618 | 198.328799  | 236.2697561 | 148.5136694 | 129.2895441 |
|        | 429.5993645 | 314.1795669 |             |             |             |
| DHRS11 | 53.98997768 | 69.55072395 | 70.16756594 | 88.61812105 | 123.9520803 |
|        | 27.7175438  | 149.3668195 | 72.38497496 | 59.33234796 | 34.77276169 |
|        | 61.62409019 | 85.55342451 | 46.95962914 | 266.5013357 | 18.60026599 |
|        | 242.6906605 | 1090.33834  | 299.290358  | 69.86702041 | 69.59671194 |
|        | 27.38267333 | 54.33030883 |             |             |             |
| DHX58  | 13.86362993 | 16.88361737 | 12.83845224 | 67.97505932 | 298.2898502 |
|        | 30.99587635 | 14.48068577 | 86.56913311 | 85.15077625 | 19.01547885 |
|        | 126.714319  | 29.64538132 | 66.42778065 | 21.95980512 | 1394.307066 |
|        | 233.5831274 | 34.01497516 | 1538.10279  | 27.39483764 | 21.85490233 |
|        | 18.05914553 | 20.09780832 |             |             |             |
| DPEP2  | 695.4566346 | 459.3705381 | 11.18070884 | 469.0254782 | 1220.279156 |
|        | 631.2800075 | 9.029403736 | 327.6079697 | 341.7222111 | 496.445567  |
|        | 636.0698166 | 22.1565212  | 1471.477094 | 116.2735817 | 16.21638188 |
|        | 2410.189476 | 502.9110289 | 37.70324907 | 158.0635767 | 131.4440963 |
|        | 4131.564833 | 4347.71622  |             |             |             |
| DPP4   | 19.45168576 | 16.56719599 | 15.7816761  | 686.98687   | 689.9495562 |
|        | 1042.227242 | 892.3150761 | 22.53108052 | 866.5973448 | 383.7055093 |
|        | 43.07303297 | 391.9641115 | 19.65506451 | 17.52701962 | 175.6975199 |
|        | 32.80967907 | 11.79647193 | 138.2117037 | 68.77332318 | 25.76939706 |
|        | 18.57167619 | 19.5766283  |             |             |             |
| DSC1   | 82.26251271 | 48.0259129  | 44.79050636 | 408.664347  | 788.0190869 |
|        | 15.6035437  | 10.21829304 | 7.631831021 | 23.3327929  | 82.60097115 |
|        | 21.21931052 | 23.81586063 | 18.85006161 | 14.93885569 | 11.66918119 |
|        | 6.707735929 | 45.60303808 | 14.70793626 | 34.51256333 | 35.70681106 |
|        | 71.06536769 | 42.13322455 |             |             |             |
| DUSP2  | 13.29827708 | 139.2748932 | 32.34016681 | 4083.939908 | 318.0170106 |
|        | 2005.427058 | 2312.349458 | 2300.259226 | 319.7380921 | 4596.059629 |
|        | 494.2129873 | 307.9165172 | 404.8953793 | 490.424434  | 567.6636334 |
|        | 261.4949956 | 292.3186781 | 536.6914932 | 39.90444703 | 758.6700823 |
|        | 1013.317761 | 88.7690473  |             |             |             |
| EA2F   | 3181.18246  | 2020.339327 | 4989.763973 | 219.0176307 | 240.986393  |
|        | 138.142275  | 265.1751702 | 197.1649083 | 208.0767508 | 181.1618028 |
|        | 198.0166857 | 184.1015768 | 683.9617628 | 281.0119542 | 284.1304512 |
|        | 281.4216469 | 230.8171913 | 468.0738156 | 401.7261393 | 399.8816761 |
|        | 742.5341803 | 240.8539709 |             |             |             |
| EBI3   | 10.50267123 | 16.93649086 | 8.897758981 | 12.21399038 | 15.05714204 |
|        | 11.53252065 | 119.0986128 | 11.63480358 | 164.024998  | 8.368172831 |

|       |             |             |             |             |             |
|-------|-------------|-------------|-------------|-------------|-------------|
|       | 10.01431702 | 16.85549775 | 12.4947299  | 13.18836854 | 20437.69231 |
|       | 311.2058679 | 16.81680477 | 6496.243408 | 8.959876311 | 134.9737807 |
|       | 9.497299095 | 11.62603766 |             |             |             |
| EFNA5 | 5.427660306 | 9.117018877 | 8.933068014 | 12.03201722 | 116.9246518 |
|       | 24.29954135 | 13.95930187 | 76.65867431 | 240.3423442 | 77.73188438 |
|       | 29.85222409 | 43.79639678 | 16.87392513 | 14.68073282 | 64.26624737 |
|       | 56.80709441 | 19.84796253 | 35.5318796  | 59.94184526 | 12.07275719 |
|       | 81.94476603 | 38.58771285 |             |             |             |
| EGR2  | 122.3401907 | 98.24319728 | 54.47162284 | 35.39583074 | 35.24465136 |
|       | 36.23835539 | 2100.112826 | 1667.329269 | 131.119     | 151.2415422 |
|       | 155.2354783 | 1331.912221 | 466.5929482 | 3919.367365 | 23.08754551 |
|       | 2175.756551 | 4531.291492 | 1121.590168 | 293.4561431 | 1906.729264 |
|       | 1430.716563 | 198.0753053 |             |             |             |
| ELANE | 11.04729816 | 8.908551164 | 9.3286347   | 103.4864778 | 12.73061175 |
|       | 12.43682411 | 6.90617027  | 9.857216379 | 16.19604013 | 18.50447818 |
|       | 734.2988939 | 167.9222444 | 28.96336488 | 15.08601415 | 103.3533021 |
|       | 206.3156576 | 12.68932527 | 13.01751849 | 4503.039803 | 4464.6663   |
|       | 119.9375404 | 31.87881829 |             |             |             |
| EMR1  | 499.0111023 | 383.0612119 | 194.3869003 | 195.8964573 | 428.0646447 |
|       | 312.812165  | 400.2184096 | 182.9389251 | 335.8350828 | 447.9667425 |
|       | 348.0789413 | 188.5213167 | 1815.513906 | 203.312067  | 3528.214438 |
|       | 404.3935503 | 178.6781861 | 237.420847  | 287.3791829 | 248.1729828 |
|       | 16330.70798 | 1253.613443 |             |             |             |
| EMR2  | 145.9766252 | 106.053844  | 67.17486231 | 43.05953599 | 56.18573504 |
|       | 83.26351882 | 72.53685465 | 21.24976442 | 96.27230625 | 165.095489  |
|       | 174.2285945 | 87.43886769 | 1319.424101 | 1045.041824 | 1516.793563 |
|       | 363.8164437 | 863.0024859 | 357.6021098 | 829.2405253 | 1558.475521 |
|       | 3871.759806 | 3956.252694 |             |             |             |
| EMR3  | 55.17004911 | 124.3420312 | 135.3256446 | 104.1704046 | 89.37299011 |
|       | 63.19960659 | 89.53763691 | 139.7591552 | 112.6019046 | 136.763141  |
|       | 63.86912529 | 64.8769987  | 379.6236682 | 38.87513434 | 13.53604074 |
|       | 5.690710112 | 17.83104509 | 19.31544328 | 185.9826158 | 322.1691705 |
|       | 4792.729376 | 3015.993844 |             |             |             |
| EPB41 | 21.98416943 | 67.00924563 | 15.20961988 | 235.3351386 | 12.29355102 |
|       | 385.6302551 | 240.8141851 | 89.94208868 | 45.47875651 | 9.639752894 |
|       | 104.9505198 | 97.80292842 | 25.10456886 | 51.91551646 | 7.165488052 |
|       | 25.55686935 | 17.91341178 | 73.20980687 | 9.708024058 | 7.155722446 |
|       | 104.6317907 | 16.47488638 |             |             |             |
| EPHA1 | 47.02936831 | 46.76894576 | 52.03367718 | 400.0482873 | 763.4010715 |
|       | 292.8838925 | 35.76999194 | 57.88335321 | 43.93245365 | 61.83016944 |
|       | 155.7830488 | 99.21173158 | 63.80169822 | 58.11820163 | 45.61964119 |
|       | 38.90350151 | 60.8481688  | 58.64760753 | 39.16381447 | 38.69471267 |
|       | 56.73556026 | 71.4205995  |             |             |             |
| EPN2  | 46.90834881 | 42.21678294 | 109.4328043 | 31.50834858 | 64.62199466 |
|       | 96.20392388 | 50.11843442 | 55.41158071 | 17.84892932 | 62.36421567 |
|       | 31.97660478 | 27.97705381 | 32.43586908 | 32.22402237 | 30.74111032 |
|       | 22.48126594 | 59.13787146 | 31.56870199 | 43.97341673 | 70.25798406 |

|         |             |             |             |             |             |
|---------|-------------|-------------|-------------|-------------|-------------|
|         | 554.8063768 | 51.26114266 |             |             |             |
| ETS1    | 988.8726693 | 792.2524045 | 410.3171187 | 613.4935899 | 287.8283832 |
|         | 1902.189462 | 1261.517205 | 701.5416085 | 1031.179862 | 99.66586714 |
|         | 759.7185652 | 696.2669173 | 85.66933558 | 96.62991012 | 130.1202875 |
|         | 75.4038863  | 120.6221577 | 115.7021417 | 147.1300736 | 156.3004608 |
|         | 230.763415  | 243.6131706 |             |             |             |
| ETV3    | 37.98662268 | 36.84623894 | 103.0952183 | 49.08454024 | 20.64868683 |
|         | 455.2117491 | 21.48427937 | 32.1556293  | 21.61892339 | 14.30737014 |
|         | 33.20716288 | 38.00908858 | 40.95675962 | 24.47191439 | 90.34410993 |
|         | 33.76856098 | 40.52550185 | 2091.702661 | 17.83028298 | 22.50028072 |
|         | 60.82035259 | 40.75588852 |             |             |             |
| FAIM3   | 11191.41447 | 8362.288551 | 254.0902643 | 5723.984822 | 8841.004838 |
|         | 5134.615329 | 1145.360549 | 7380.970003 | 4680.731681 | 1866.749257 |
|         | 2548.903709 | 478.4201622 | 117.871065  | 315.0175529 | 53.69761011 |
|         | 157.4129632 | 147.2831703 | 49.08029322 | 58.68422735 | 45.15325264 |
|         | 488.4465999 | 735.0353714 |             |             |             |
| FAM124B | 21.67016354 | 15.40803255 | 18.92107732 | 14.04816696 | 17.18073516 |
|         | 20.50088961 | 16.26784814 | 16.06928085 | 13.18060161 | 10.75869747 |
|         | 20.02563485 | 18.188607   | 29.15950369 | 19.3314478  | 9.129359328 |
|         | 22.79147187 | 16.61570142 | 11.26463001 | 473.0941252 | 126.8779546 |
|         | 96.55065376 | 19.72983414 |             |             |             |
| FAM174B | 117.7226808 | 92.46718738 | 82.29386042 | 94.16937409 | 137.0201675 |
|         | 104.0881916 | 92.90928381 | 163.1153582 | 160.6169251 | 69.86697577 |
|         | 40.33600095 | 37.77736037 | 39.85052889 | 53.40511981 | 57.84876862 |
|         | 68.59561619 | 42.79765197 | 40.87114944 | 866.8101902 | 390.2498203 |
|         | 73.78985768 | 103.0050021 |             |             |             |
| FAM198B | 9.800664188 | 16.43893928 | 9.140836633 | 4.526894401 | 30.53349636 |
|         | 8.45170015  | 5.598819437 | 13.63143065 | 20.58243315 | 54.27641657 |
|         | 23.76109791 | 10.27433459 | 515.249292  | 519.5115003 | 36.63587146 |
|         | 398.2258384 | 563.731154  | 45.53321991 | 34.9096904  | 48.35776342 |
|         | 58.16319768 | 8.88467942  |             |             |             |
| FAM212B | 49.97014577 | 48.44610942 | 115.1532722 | 23.00981627 | 12.55533168 |
|         | 25.23626149 | 70.72102235 | 17.60479495 | 98.45119026 | 31.95594959 |
|         | 13.78507742 | 20.4848163  | 95.87273144 | 44.3949005  | 15.81931361 |
|         | 15.45266056 | 19.30988108 | 12.50084037 | 52.82638983 | 87.80595326 |
|         | 113.7106812 | 569.9349175 |             |             |             |
| FAM65B  | 4719.699579 | 5267.741473 | 237.5875518 | 3376.093302 | 4454.485846 |
|         | 2808.159439 | 256.5379971 | 665.2076215 | 910.8875823 | 2376.662113 |
|         | 1586.716996 | 696.5310083 | 2428.861545 | 92.82935445 | 193.0268711 |
|         | 86.87890188 | 136.2081634 | 126.2864186 | 187.4701407 | 170.8249765 |
|         | 2755.053484 | 8329.197426 |             |             |             |
| FASLG   | 342.8390554 | 274.6088916 | 188.93844   | 169.2167794 | 144.0787779 |
|         | 140.8491762 | 478.9874938 | 126.7421568 | 171.4953465 | 600.2580034 |
|         | 1537.723722 | 2218.049204 | 108.383093  | 101.1502198 | 80.50952615 |
|         | 85.78259883 | 70.64960056 | 101.0667448 | 128.362777  | 147.2678931 |
|         | 115.7068375 | 250.192653  |             |             |             |
| FBXL8   | 7.713639432 | 3.515112115 | 15.05714204 | 91.19310135 | 53.47478762 |

|             |             |             |             |                         |
|-------------|-------------|-------------|-------------|-------------------------|
| 313.0593206 | 66.28866703 | 53.28186176 | 99.56256588 | 47.42553518             |
| 12.81344642 | 32.60848091 | 43.1055926  | 14.5008585  | 148.2319802             |
| 114.7348137 | 67.36258689 | 55.64683088 | 7.765887386 | 6.318548034             |
| 4.601188064 | 8.576738645 |             |             |                         |
| FCER1A      | 106.1351171 | 80.99986492 | 88.81589691 | 111.3010937 70.33336588 |
| 129.667324  | 64.11513732 | 29.85402332 | 73.23250104 | 286.9014407             |
| 168.922198  | 98.18855945 | 622.2119019 | 45.65742898 | 56.54869661             |
| 801.8866109 | 2215.373887 | 88.29115522 | 4443.124585 | 4222.609307             |
| 2525.841586 | 106.8980281 |             |             |                         |
| FCER2       | 990.3077473 | 210.1913338 | 26.3738691  | 8.626141867 19.37674145 |
| 10.14786303 | 17.85021806 | 10.37726055 | 30.97494747 | 9.772859254             |
| 12.55432737 | 13.36812571 | 12.66527557 | 212.7516179 | 10.52617889             |
| 352.9280319 | 1104.166801 | 98.25529772 | 13.539828   | 16.26399175             |
| 31.52912247 | 11.25081202 |             |             |                         |
| FCGR2B      | 3389.8606   | 4533.908058 | 2656.037745 | 65.97309417 8.255798098 |
| 30.69853755 | 59.92126523 | 108.5578105 | 127.1097924 | 121.0118537             |
| 119.9451162 | 181.4820226 | 287.6388369 | 991.9681697 | 311.314882              |
| 1548.943526 | 1529.233028 | 137.2036108 | 626.9589967 | 1610.39688              |
| 645.9279905 | 1302.127371 |             |             |                         |
| FCGR3B      | 434.6883898 | 191.9423831 | 121.1090782 | 178.1993614 61.46749025 |
| 133.7448215 | 106.4982845 | 64.11513732 | 203.850527  | 446.2450155             |
| 494.7560439 | 369.6606901 | 402.4458452 | 256.3156774 | 154.0822062             |
| 155.6717837 | 158.6201963 | 125.0983352 | 290.4715044 | 123.6149676             |
| 321.0470841 | 27546.9664  |             |             |                         |
| FCN1        | 160.5487443 | 92.91123613 | 109.9311142 | 130.0754644 144.5883358 |
| 98.71765801 | 63.37271678 | 116.5979064 | 122.2714734 | 5094.70768              |
| 465.2336051 | 121.8089713 | 29800.42108 | 1401.079575 | 306.8296547             |
| 593.0958939 | 121.7194027 | 120.9633626 | 483.4804269 | 562.6779332             |
| 168.3568238 | 5370.355855 |             |             |                         |
| FCRL2       | 4384.737162 | 3466.953007 | 714.6372738 | 73.7221496 34.17485561  |
| 55.77947477 | 79.24179515 | 46.90834881 | 24.53453756 | 157.2790481             |
| 54.32604608 | 49.01458544 | 47.6563456  | 36.19137437 | 30.94941671             |
| 17.75900367 | 61.14907238 | 38.40731991 | 42.54800493 | 30.86969384             |
| 82.33991761 | 116.1844543 |             |             |                         |
| FES         | 8.544430362 | 8.676013229 | 10.34392287 | 9.520155138 8.032047496 |
| 6.024967349 | 7.843078446 | 7.262313101 | 8.504060287 | 97.09901245             |
| 211.838797  | 258.841965  | 826.5409485 | 41.65766393 | 20.94215824             |
| 982.2000845 | 345.415859  | 10.72101379 | 121.9591412 | 76.89948356             |
| 389.5499618 | 534.5825131 |             |             |                         |
| FFAR2       | 12.83845224 | 15.54382491 | 20.15690171 | 11.77579288 11.92870205 |
| 15.89364427 | 16.94262088 | 14.98197508 | 28.272854   | 24.4582214              |
| 73.96615142 | 13.44126834 | 101.05938   | 31.01207332 | 454.5513273             |
| 87.81654144 | 17.74165652 | 16.51972226 | 76.33948281 | 89.36683692             |
| 1048.091741 | 4025.755477 |             |             |                         |
| FLJ13197    | 129.5124355 | 51.64103294 | 16.11115902 | 167.3200623 260.3922902 |
| 110.1171051 | 19.8911471  | 41.76287856 | 30.5070053  | 30.25891777             |
| 147.0679625 | 36.95107529 | 15.24807194 | 7.575081726 | 15.19584325             |

|        |             |             |             |             |             |
|--------|-------------|-------------|-------------|-------------|-------------|
|        | 10.88684503 | 10.0917531  | 8.549571152 | 22.40135257 | 16.54334331 |
|        | 76.45802449 | 11.65518546 |             |             |             |
| FLT3LG | 26.22845437 | 56.33557728 | 33.23725547 | 1267.031752 | 2489.205564 |
|        | 1471.268235 | 234.4917711 | 309.7698509 | 644.6131105 | 222.022152  |
|        | 226.7845957 | 367.4048158 | 69.27835254 | 18.86233643 | 18.188607   |
|        | 60.37056445 | 18.33062213 | 62.75049101 | 22.87589336 | 47.4891672  |
|        | 156.402118  | 26.35814025 |             |             |             |
| FLVCR2 | 69.18049192 | 86.59482486 | 45.35113413 | 83.37381583 | 90.1471958  |
|        | 145.8719106 | 242.0193671 | 256.9226064 | 217.1777617 | 144.8106524 |
|        | 140.2531417 | 88.34055902 | 566.9712028 | 1142.352389 | 1989.419532 |
|        | 951.2228505 | 2317.021706 | 1056.886238 | 266.9231614 | 198.7626785 |
|        | 75.80729715 | 108.4609673 |             |             |             |
| FOSB   | 200.0093028 | 243.4082578 | 2911.316126 | 41.65285438 | 401.5583963 |
|        | 59.70898915 | 32.1556293  | 5833.248925 | 24.99410874 | 37.53954222 |
|        | 32.22859594 | 31.75264764 | 3422.450435 | 29.34004788 | 23.17042572 |
|        | 22.49743226 | 28.8254167  | 45.83078441 | 92.82531833 | 644.5586469 |
|        | 7325.609904 | 80.15125244 |             |             |             |
| FOXP3  | 135.9782583 | 93.5353139  | 41.24636078 | 65.14694151 | 129.5124355 |
|        | 190.192431  | 478.810999  | 146.8412284 | 2001.919746 | 103.9721613 |
|        | 31.98561018 | 56.57949837 | 76.15295297 | 62.1654919  | 171.731211  |
|        | 63.79022174 | 63.27839509 | 64.02824977 | 69.49716875 | 23.27253143 |
|        | 140.8020324 | 164.6742962 |             |             |             |
| FPR1   | 361.3212533 | 387.2639146 | 343.9217634 | 210.2034137 | 161.9808797 |
|        | 240.3083941 | 161.2444569 | 248.213136  | 222.4633603 | 911.9483813 |
|        | 397.2639649 | 303.3669097 | 9800.634834 | 880.9211063 | 801.8866109 |
|        | 408.5415267 | 281.0707287 | 222.4014754 | 660.8588777 | 716.9951177 |
|        | 3809.534017 | 27644.58995 |             |             |             |
| FPR2   | 227.4506603 | 162.9187996 | 101.1071972 | 54.91749032 | 60.78015047 |
|        | 57.00754952 | 24.31747659 | 56.44753053 | 97.93080766 | 168.8394702 |
|        | 88.1553815  | 69.04044011 | 964.2419055 | 182.3163119 | 274.9365739 |
|        | 95.43864594 | 62.80252929 | 48.59895914 | 195.1670966 | 344.4167653 |
|        | 150.7924613 | 3797.403194 |             |             |             |
| FPR3   | 325.6674246 | 243.6605005 | 84.16107071 | 105.807962  | 97.29879579 |
|        | 116.5979064 | 99.98686977 | 128.4835934 | 153.046445  | 196.9377727 |
|        | 112.657984  | 94.70041249 | 203.421307  | 3004.448975 | 608.2692535 |
|        | 2357.542622 | 5751.146697 | 4194.211448 | 200.0838912 | 328.0502272 |
|        | 211.1145595 | 277.4149037 |             |             |             |
| FRK    | 138.3048999 | 125.3630578 | 59.60491785 | 26.38936082 | 11.24943836 |
|        | 5.639101241 | 6.171513508 | 3.210667699 | 6.588217809 | 57.57067756 |
|        | 3.655442581 | 6.694465385 | 7.43265118  | 10.88453313 | 3.762990897 |
|        | 3.129845825 | 13.42127435 | 18.05689621 | 2.434618453 | 5.775390014 |
|        | 6.41696694  | 61.16828044 |             |             |             |
| FRMD4A | 57.81750686 | 73.55800845 | 17.18073516 | 49.31923782 | 24.03797283 |
|        | 71.89460431 | 48.33458991 | 211.2458646 | 38.98612196 | 23.15443689 |
|        | 46.14200777 | 43.21756185 | 52.74025927 | 161.857003  | 256.1732314 |
|        | 1094.097795 | 229.1834068 | 57.27849364 | 43.95612501 | 57.91160526 |
|        | 76.09249167 | 21.62064394 |             |             |             |

|         |             |             |             |             |             |
|---------|-------------|-------------|-------------|-------------|-------------|
| FRMD8   | 197.3732828 | 150.7395951 | 80.20078747 | 28.9702418  | 14.61435957 |
|         | 141.1237411 | 249.2964218 | 228.186585  | 1019.519496 | 70.74900337 |
|         | 249.1822219 | 162.813157  | 247.2516889 | 125.8231332 | 271.9483575 |
|         | 170.7725366 | 241.4254373 | 290.6920702 | 31.1452567  | 134.4864268 |
|         | 132.1534127 | 172.2630314 |             |             |             |
| FZD2    | 40.20305932 | 10.76683514 | 25.20265438 | 13.86980966 | 23.74932601 |
|         | 6.482478073 | 10.89927471 | 9.463569762 | 14.54663645 | 68.17805047 |
|         | 21.52230454 | 11.61080204 | 455.2912189 | 98.02418421 | 409.5554813 |
|         | 777.4188883 | 831.7517546 | 236.3498633 | 210.0179936 | 171.534545  |
|         | 40.47220877 | 16.40047837 |             |             |             |
| FZD3    | 121.5674974 | 138.3505755 | 181.1627863 | 50.26515479 | 96.62044786 |
|         | 39.04159069 | 136.5432862 | 449.1787857 | 63.60598821 | 59.00916719 |
|         | 29.43502605 | 38.82769283 | 39.70835546 | 31.33678222 | 32.63242659 |
|         | 195.3507704 | 77.88233881 | 24.30648198 | 58.84581105 | 68.23533874 |
|         | 28.00346067 | 73.00874476 |             |             |             |
| GAL3ST4 | 69.54706802 | 72.93354863 | 48.67912609 | 335.5930908 | 942.3193748 |
|         | 238.0119755 | 123.3772483 | 256.2684015 | 169.488552  | 50.30538263 |
|         | 35.6643216  | 36.41518352 | 44.09898382 | 84.21537991 | 40.44995594 |
|         | 141.0660169 | 141.2340099 | 57.36368731 | 198.8061414 | 98.79983558 |
|         | 310.5298451 | 77.37112075 |             |             |             |
| GALR1   | 2.661554274 | 4.348941107 | 5.90308276  | 3.908160923 | 41.01608039 |
|         | 6.212037366 | 3.847184414 | 6.994769751 | 4.835860747 | 18.63540007 |
|         | 4.227180464 | 3.69898121  | 4.179834102 | 2.442423079 | 4.897631255 |
|         | 8.968861076 | 2.493139629 | 3.475112044 | 4.223909018 | 18.24601309 |
|         | 15.43906987 | 6.071751695 |             |             |             |
| GFI1    | 27.63680315 | 25.20303785 | 40.28604041 | 293.640883  | 48.08423235 |
|         | 132.9727705 | 700.6608098 | 561.1786244 | 587.5134761 | 337.3673177 |
|         | 508.7800779 | 394.3207649 | 19.38352568 | 29.03365269 | 24.66700128 |
|         | 26.60841604 | 34.30719036 | 53.2689152  | 1114.642442 | 628.8432206 |
|         | 40.27670531 | 41.43881952 |             |             |             |
| GGT5    | 11.49823256 | 9.101161188 | 16.62951352 | 12.99967839 | 24.53939902 |
|         | 9.261514296 | 11.57823288 | 10.13745863 | 6.912133983 | 14.80259974 |
|         | 16.95386801 | 13.68021641 | 11.13018839 | 10.60327972 | 290.2150742 |
|         | 407.7940357 | 21.9710094  | 12.62902183 | 15.14646617 | 52.37771168 |
|         | 99.69997101 | 16.79237197 |             |             |             |
| GIPR    | 8.245074698 | 8.69890136  | 5.570829264 | 10.90883943 | 20.2876468  |
|         | 5.19508538  | 9.251047619 | 30.90820518 | 32.74751321 | 67.5773091  |
|         | 13.45361226 | 11.72814867 | 8.506723418 | 7.247773205 | 31.73041766 |
|         | 23.65144355 | 8.587227324 | 11.2653381  | 17.06083294 | 25.50899867 |
|         | 110.9133339 | 10.05277019 |             |             |             |
| GNG7    | 768.0078466 | 1494.305763 | 2218.049204 | 133.5514698 | 99.42210121 |
|         | 104.2562884 | 75.96955929 | 63.64624142 | 214.2818797 | 51.82499254 |
|         | 60.45334031 | 53.08765217 | 112.449475  | 82.41009583 | 94.49057817 |
|         | 243.4861493 | 187.5124462 | 70.79123977 | 170.2524464 | 115.3507975 |
|         | 197.7715925 | 455.4134725 |             |             |             |
| GNLY    | 9.016559093 | 14.52025513 | 19.25302109 | 3732.536058 | 134.9186388 |
|         | 1198.37505  | 233.4211369 | 12.65987353 | 24.36657201 | 8201.567151 |



|        |             |             |             |             |             |
|--------|-------------|-------------|-------------|-------------|-------------|
|        | 21760.60028 | 23235.35012 | 19.94743339 | 16.57744727 | 20.40693277 |
|        | 15.74284151 | 22.37056888 | 21.45038814 | 26.17106781 | 18.37211337 |
|        | 24.52606794 | 118.2602821 |             |             |             |
| GPC4   | 126.6902267 | 73.41170643 | 105.523008  | 43.02443597 | 59.39944184 |
|        | 77.95639785 | 53.75861921 | 60.05830259 | 60.95504449 | 92.09947118 |
|        | 77.48575035 | 42.58445228 | 56.14456485 | 1153.718547 | 129.3188315 |
|        | 145.8719106 | 161.2550359 | 86.47333389 | 72.23389989 | 79.65437831 |
|        | 31.55476171 | 111.2722902 |             |             |             |
| GPR1   | 3.129845825 | 4.79850122  | 2.493139629 | 1.559283973 | 44.35621868 |
|        | 1.244201526 | 0.453354164 | 17.15481458 | 52.08421325 | 14.99847133 |
|        | 17.25032467 | 1.863695454 | 5.245664557 | 1.064159643 | 0.972464723 |
|        | 0.453354164 | 1.025582915 | 2.979127268 | 37.47986528 | 12.27884037 |
|        | 1.869736619 | 4.064088815 |             |             |             |
| GPR171 | 33.51495052 | 22.98219258 | 13.87497835 | 924.3717963 | 899.2846127 |
|        | 969.236538  | 2693.556404 | 227.8557261 | 6933.009161 | 4853.059657 |
|        | 443.0770732 | 1041.132076 | 14.67922106 | 12.06520012 | 25.51768362 |
|        | 54.79422344 | 19.22969007 | 560.4038043 | 84.11631212 | 46.41606111 |
|        | 1086.272212 | 30.67179408 |             |             |             |
| GPR18  | 3056.84082  | 1822.014185 | 15.28674853 | 1037.066376 | 1241.790015 |
|        | 678.2573057 | 431.4075402 | 1521.532591 | 215.7526442 | 840.8407261 |
|        | 1204.171373 | 2025.829576 | 109.6660347 | 23.11613842 | 51.61492393 |
|        | 54.63497421 | 21.83449399 | 33.94734448 | 52.30100217 | 39.9013615  |
|        | 266.0015774 | 156.3072275 |             |             |             |
| GPR183 | 275.8348106 | 2308.149818 | 296.6071048 | 630.5280037 | 854.0807595 |
|        | 3012.768061 | 2265.096641 | 965.2070375 | 454.3725611 | 475.9389405 |
|        | 216.2351844 | 201.5996553 | 196.979149  | 437.1733508 | 1631.804333 |
|        | 2474.434424 | 437.8462334 | 1945.433337 | 303.5641536 | 795.5512127 |
|        | 5121.174533 | 144.0671927 |             |             |             |
| GPR19  | 27.02537152 | 36.08351025 | 78.06875407 | 40.61246787 | 73.33196188 |
|        | 71.86055345 | 373.0594532 | 336.9689608 | 397.8626539 | 29.76682384 |
|        | 42.35493987 | 65.65533364 | 19.81202335 | 19.66810706 | 10.56154776 |
|        | 11.00115106 | 19.86290214 | 14.74706676 | 17.35908885 | 16.0100968  |
|        | 237.9715496 | 49.98684446 |             |             |             |
| GPR25  | 4.292572754 | 29.42735453 | 141.0660169 | 28.7191378  | 10.77863651 |
|        | 138.1919025 | 12.75467855 | 21.82778451 | 41.74363822 | 10.93345478 |
|        | 11.1673751  | 21.43533197 | 14.04592183 | 8.494154594 | 27.36083709 |
|        | 14.41666747 | 11.76229619 | 4.701007424 | 22.81784638 | 15.84215873 |
|        | 18.26386402 | 16.9118569  |             |             |             |
| GPR65  | 507.5709281 | 490.2704567 | 162.813157  | 1518.573945 | 572.3060778 |
|        | 1499.931247 | 850.211608  | 252.2799806 | 608.4463585 | 2511.23381  |
|        | 2138.331722 | 2137.237334 | 1473.160908 | 702.0291957 | 263.7450621 |
|        | 993.5543835 | 607.4918095 | 155.0751578 | 1700.97754  | 1507.86671  |
|        | 8034.40209  | 2530.19965  |             |             |             |
| GPR97  | 154.4101049 | 141.428644  | 207.6511007 | 104.9389313 | 57.15128061 |
|        | 138.4573773 | 94.40581808 | 39.81497642 | 136.0103845 | 96.9370486  |
|        | 295.1646205 | 418.1169425 | 71.26388228 | 98.36835876 | 137.5495819 |
|        | 92.19065542 | 119.263697  | 138.6725511 | 261.4611106 | 460.8781982 |

|         |             |             |             |             |             |
|---------|-------------|-------------|-------------|-------------|-------------|
|         | 4581.696353 | 2246.982554 |             |             |             |
| GRAP2   | 12.62708927 | 15.00203046 | 11.63480358 | 280.9234111 | 318.9107126 |
|         | 269.2219489 | 151.959726  | 201.2672093 | 189.8106758 | 166.772216  |
|         | 200.763896  | 307.2558216 | 11.82509864 | 9.44203317  | 15.99426095 |
|         | 20.12785138 | 7.973524377 | 10.11500312 | 234.8866301 | 140.1321556 |
|         | 13.68032754 | 10.85570109 |             |             |             |
| GSTT1   | 6.958858985 | 12.48982331 | 12.11447678 | 18.64410933 | 43.10259613 |
|         | 14.99403456 | 14.09510035 | 83.68091706 | 24.66756578 | 14.72558502 |
|         | 15.93181405 | 15.76945271 | 17.31196185 | 51.03653105 | 82.52506061 |
|         | 520.5704059 | 634.2257819 | 64.6589982  | 349.3679467 | 391.8491675 |
|         | 40.40866355 | 23.00205986 |             |             |             |
| GUSBP11 | 8048.07448  | 10388.03123 | 30254.0679  | 521.3361484 | 587.5664324 |
|         | 151.2654723 | 9.073509293 | 447.7619209 | 268.2718711 | 15.07275333 |
|         | 311.6532884 | 98.43888337 | 43.51505491 | 6.401562035 | 14.61435957 |
|         | 286.719961  | 9.045254731 | 9.611149339 | 51.74630466 | 22.89358188 |
|         | 371.5811685 | 277.7647569 |             |             |             |
| GYPE    | 38.71816582 | 61.40275529 | 35.67150717 | 26.87927605 | 8.008517109 |
|         | 3.69898121  | 4.833493917 | 6.90617027  | 75.98982389 | 61.8922118  |
|         | 15.90605862 | 24.75298907 | 6.627731906 | 7.19407517  | 7.071638638 |
|         | 13.09271261 | 5.369616159 | 8.386579586 | 9.235760341 | 3.745156913 |
|         | 8.022460261 | 14.23666653 |             |             |             |
| GZMA    | 204.958358  | 217.1903236 | 91.85142742 | 6301.839315 | 440.9534741 |
|         | 4034.52042  | 1173.96483  | 130.7405303 | 318.1893547 | 14188.10221 |
|         | 13660.47953 | 22380.29444 | 132.0433731 | 95.37711154 | 109.7080589 |
|         | 68.0390322  | 93.29389844 | 128.6984558 | 50.07477091 | 68.27005989 |
|         | 150.5888289 | 334.8696127 |             |             |             |
| GZMB    | 102.255299  | 68.32230989 | 62.71521001 | 2080.697741 | 85.36127082 |
|         | 58.9177582  | 21960.79819 | 64.03542312 | 53.64876826 | 6018.578754 |
|         | 15276.85279 | 23235.35012 | 61.71915165 | 136.87295   | 159.2974346 |
|         | 111.0281937 | 30.67820522 | 82.17563279 | 947.0769465 | 5600.547397 |
|         | 226.9706864 | 154.330993  |             |             |             |
| GZMH    | 21.35853068 | 33.95743123 | 41.24636078 | 8555.821981 | 198.9335618 |
|         | 630.7749174 | 896.7120375 | 26.30390688 | 79.31202778 | 10428.44501 |
|         | 11889.00904 | 7419.827913 | 36.90093477 | 24.82219085 | 15.89364427 |
|         | 14.88173325 | 17.75887232 | 26.34630303 | 17.9815414  | 19.61378309 |
|         | 52.48247611 | 41.85793547 |             |             |             |
| GZMK    | 184.0395826 | 278.1808222 | 100.8148697 | 8814.387272 | 1423.65694  |
|         | 3724.329794 | 187.7181578 | 119.8476496 | 51.85294841 | 15903.70006 |
|         | 1967.19369  | 233.6749633 | 67.13748264 | 69.54165218 | 107.0724606 |
|         | 24.66700128 | 79.45607344 | 81.98912286 | 38.19756342 | 76.14236186 |
|         | 151.2474716 | 421.2121304 |             |             |             |
| GZMM    | 6.305414565 | 16.45527256 | 12.3063871  | 1048.989355 | 1215.533292 |
|         | 884.0128037 | 529.132872  | 1030.215674 | 644.0425249 | 893.7767856 |
|         | 3771.290343 | 2616.387026 | 13.20630847 | 17.49904782 | 29.38087813 |
|         | 10.33284771 | 10.30937689 | 20.75077043 | 10.50550296 | 31.99969933 |
|         | 137.5324623 | 65.82671625 |             |             |             |
| HAL     | 380.2322774 | 308.5027329 | 108.9091177 | 84.17530879 | 61.60426486 |

|           |             |             |             |             |             |
|-----------|-------------|-------------|-------------|-------------|-------------|
|           | 75.48182942 | 78.63381891 | 548.1212227 | 79.74092409 | 191.4998166 |
|           | 99.60146076 | 96.12281291 | 877.1793038 | 102.784423  | 90.95985764 |
|           | 76.24018935 | 74.77632532 | 54.11520645 | 130.3179977 | 91.4599882  |
|           | 192.0721184 | 3105.095231 |             |             |             |
| HCK       | 273.5706061 | 489.3443473 | 130.5834263 | 106.4569423 | 107.2851313 |
|           | 80.31784648 | 81.79892574 | 43.76861448 | 75.08844559 | 737.406205  |
|           | 391.7033029 | 184.1658664 | 7368.002228 | 3576.179245 | 8146.586422 |
|           | 4811.755806 | 4370.59343  | 3772.369126 | 616.1411859 | 834.9287387 |
|           | 3730.856433 | 7443.161769 |             |             |             |
| HDC       | 147.9736788 | 177.8451002 | 310.1156544 | 123.8596636 | 18.24228689 |
|           | 118.9595662 | 82.7123624  | 23.22265447 | 91.91206074 | 90.33473739 |
|           | 200.3498771 | 150.8083027 | 129.5522336 | 114.2614669 | 200.9810494 |
|           | 172.2889652 | 149.3724413 | 109.8186109 | 9299.383668 | 9389.503009 |
|           | 1119.899701 | 150.6140872 |             |             |             |
| HESX1     | 6.869435614 | 5.810228378 | 9.073509293 | 7.046990167 | 8.172396024 |
|           | 5.971548735 | 7.370460489 | 8.369699084 | 37.84864451 | 7.64453315  |
|           | 8.440480409 | 9.195676707 | 8.365084929 | 7.285721879 | 2324.301051 |
|           | 100.3133583 | 12.06326019 | 1074.504512 | 6.47248879  | 11.36628394 |
|           | 10.3966513  | 7.283926945 |             |             |             |
| HHEX      | 4489.488986 | 2773.84053  | 93.42592839 | 139.0353705 | 83.41360206 |
|           | 105.0214682 | 88.61808798 | 78.89317933 | 55.90922856 | 263.6249346 |
|           | 245.8936654 | 202.8459866 | 1914.137567 | 489.3080097 | 66.50542817 |
|           | 566.3249387 | 929.3017456 | 94.43877672 | 1317.400196 | 636.7392929 |
|           | 999.3650819 | 946.2641209 |             |             |             |
| HIC1      | 5.092351833 | 4.093578948 | 6.795317032 | 8.159927666 | 18.79636185 |
|           | 5.971548735 | 7.057961151 | 6.633637977 | 88.0877177  | 11.44970382 |
|           | 15.68354842 | 41.82249473 | 7.017818913 | 6.432515224 | 12.57775597 |
|           | 6.223850888 | 7.589776753 | 12.15568636 | 8.937587114 | 8.052876552 |
|           | 12.829329   | 7.476611925 |             |             |             |
| HIST1H2AE | 35.26722995 | 21.8243194  | 277.7164299 | 29.91298037 | 30.34545814 |
|           | 45.64822436 | 11.24943836 | 110.4902286 | 64.89000999 | 15.85352471 |
|           | 14.84822972 | 6.198523194 | 8.28188422  | 6.633607497 | 6.332890006 |
|           | 9.272327825 | 17.89759376 | 41.34339654 | 16.93785386 | 29.36019802 |
|           | 79.29384956 | 22.11671753 |             |             |             |
| HIST1H2BG | 17.44318854 | 42.30455978 | 689.6460957 | 78.31604621 | 138.8837705 |
|           | 190.054614  | 52.48031743 | 182.147041  | 117.0121723 | 72.04696546 |
|           | 68.37610587 | 11.21409988 | 23.39236935 | 11.49352112 | 10.13745863 |
|           | 8.737345423 | 38.3658796  | 137.8269375 | 49.45247756 | 29.77503454 |
|           | 62.63375304 | 45.19348156 |             |             |             |
| HK3       | 12.94364358 | 9.44765425  | 13.29827708 | 21.81413027 | 25.374709   |
|           | 12.81515335 | 21.8935711  | 15.36690486 | 19.81013313 | 140.6970049 |
|           | 222.5053519 | 32.40772779 | 3103.136582 | 3713.557866 | 31.97610013 |
|           | 159.1217051 | 1093.669785 | 294.1705912 | 37.91335842 | 234.2311504 |
|           | 1199.688932 | 1255.80611  |             |             |             |
| HLA-DOB   | 6607.334733 | 4832.779431 | 4287.536344 | 212.2757519 | 54.34069564 |
|           | 47.963256   | 44.00072194 | 118.2666793 | 117.0529938 | 44.15872342 |
|           | 230.4248523 | 188.3202183 | 102.1825691 | 49.6673024  | 1573.187324 |

|          |              |              |              |              |              |
|----------|--------------|--------------|--------------|--------------|--------------|
|          | 41. 5765162  | 37. 2824505  | 2006. 948626 | 63. 49779998 | 48. 71801042 |
|          | 227. 8449074 | 96. 88647987 |              |              |              |
| HLA-DQA1 | 942. 7749076 | 1379. 121703 | 161. 7246112 | 173. 4117383 | 122. 6942485 |
|          | 106. 9349988 | 167. 0688665 | 89. 17794598 | 621. 2518682 | 356. 7324528 |
|          | 219. 2102706 | 214. 9325691 | 275. 3534268 | 874. 2342868 | 4169. 716387 |
|          | 5225. 867112 | 7712. 247914 | 6417. 316621 | 190. 2949934 | 390. 0099509 |
|          | 68. 2343922  | 218. 2099668 |              |              |              |
| HMGB3P30 | 30. 97425375 | 30. 88530653 | 36. 51263796 | 42. 79987867 | 3. 547906137 |
|          | 52. 31915781 | 40. 80982734 | 5. 822857646 | 359. 7407068 | 101. 6070301 |
|          | 38. 72002482 | 62. 1534728  | 27. 19577484 | 39. 38790361 | 55. 10360905 |
|          | 37. 55103381 | 46. 97065338 | 53. 61427074 | 36. 03095911 | 16. 65415201 |
|          | 69. 89874699 | 76. 9105534  |              |              |              |
| HNMT     | 61. 73602193 | 55. 47571769 | 28. 54732378 | 19. 61866274 | 10. 96771886 |
|          | 11. 06762282 | 31. 71073352 | 8. 992612544 | 24. 60168339 | 79. 57214932 |
|          | 26. 91293797 | 13. 5847049  | 815. 4265044 | 774. 9294257 | 161. 3031858 |
|          | 948. 8385009 | 636. 1739965 | 279. 1068543 | 131. 7566915 | 122. 4906095 |
|          | 25. 91241295 | 29. 96288574 |              |              |              |
| HOXA1    | 12. 90856012 | 10. 23319877 | 9. 656741815 | 12. 85536224 | 13. 26159685 |
|          | 6. 91970575  | 11. 04729816 | 18. 89413582 | 11. 40467609 | 14. 51961531 |
|          | 11. 76733746 | 9. 61033962  | 10. 68723722 | 12. 91531933 | 6. 869435614 |
|          | 9. 891781855 | 11. 52610311 | 8. 30653615  | 760. 2924663 | 450. 3900541 |
|          | 8. 713825016 | 17. 61748588 |              |              |              |
| HPGDS    | 203. 7910498 | 224. 547027  | 125. 9523542 | 83. 72110944 | 88. 13751751 |
|          | 182. 147041  | 92. 78922471 | 56. 70706623 | 219. 6942345 | 118. 9847774 |
|          | 177. 6752993 | 148. 3391263 | 36. 75265198 | 239. 7846459 | 64. 8769987  |
|          | 138. 6741034 | 195. 4447153 | 125. 1233721 | 21760. 60028 | 17743. 45795 |
|          | 256. 5193159 | 219. 1322864 |              |              |              |
| HPSE     | 30. 8024485  | 29. 58277474 | 32. 74521328 | 55. 34751097 | 132. 3282146 |
|          | 207. 2614073 | 494. 245822  | 234. 9215764 | 157. 5455198 | 302. 9255809 |
|          | 29. 9724331  | 54. 88908823 | 1285. 833086 | 61. 93696691 | 841. 0904631 |
|          | 894. 528267  | 27. 69056049 | 30. 84139727 | 164. 6993882 | 103. 8988856 |
|          | 39. 27972971 | 973. 4037642 |              |              |              |
| HRH1     | 206. 5394742 | 165. 4581351 | 161. 4809975 | 75. 97436695 | 26. 48229454 |
|          | 101. 1491714 | 284. 8186666 | 78. 2920509  | 108. 9553664 | 212. 4319062 |
|          | 54. 07639831 | 42. 47010982 | 72. 1745748  | 217. 6585736 | 145. 2834807 |
|          | 2195. 073255 | 202. 5321442 | 128. 2673018 | 119. 1113422 | 116. 6680467 |
|          | 81. 41713941 | 227. 8748322 |              |              |              |
| HSPA6    | 70. 64960056 | 148. 2879125 | 17. 74602894 | 106. 7169109 | 89. 65418124 |
|          | 21. 31200497 | 20. 34672736 | 259. 1902042 | 358. 1515065 | 78. 69909351 |
|          | 184. 8377232 | 284. 0317902 | 641. 2142131 | 22. 41022369 | 139. 8627137 |
|          | 207. 4981375 | 65. 31326001 | 20. 58127818 | 69. 23074494 | 129. 0246893 |
|          | 727. 0675325 | 3303. 08264  |              |              |              |
| HTR2B    | 6. 171513508 | 13. 11478166 | 26. 40774882 | 22. 71063607 | 11. 3103513  |
|          | 5. 822857646 | 4. 605860048 | 9. 317338154 | 26. 43901488 | 77. 03535453 |
|          | 30. 97175272 | 6. 958858985 | 13. 85052231 | 6. 900538825 | 31. 86953296 |
|          | 216. 0502815 | 19. 64801361 | 382. 9194372 | 52. 69279218 | 4. 888042211 |
|          | 8. 275869344 | 7. 446654092 |              |              |              |

|        |             |             |             |             |             |
|--------|-------------|-------------|-------------|-------------|-------------|
| ICA1   | 191.4053509 | 115.3270172 | 209.3903648 | 134.2533776 | 149.651559  |
|        | 289.2721081 | 160.7794316 | 2419.169387 | 216.2736493 | 194.6366579 |
|        | 133.7203845 | 135.275358  | 183.2555042 | 198.8629383 | 192.8882167 |
|        | 157.9232363 | 204.0001741 | 190.5740318 | 218.8477587 | 198.9860864 |
|        | 165.6905432 | 309.3789708 |             |             |             |
| ICOS   | 6.458825767 | 8.407302028 | 6.147205936 | 194.1905981 | 1018.135876 |
|        | 786.5967435 | 1804.928958 | 7744.01596  | 738.9703291 | 36.42210641 |
|        | 12.554434   | 22.53108052 | 5.362446048 | 4.485992218 | 18.58723205 |
|        | 5.065226719 | 6.702810599 | 6.159261216 | 5.202255893 | 5.256582916 |
|        | 13.9959794  | 6.199101199 |             |             |             |
| ID01   | 241.0650179 | 312.4524995 | 345.5621343 | 241.3331484 | 192.0869901 |
|        | 248.9097098 | 201.7392421 | 241.4925332 | 91.27779079 | 183.5919996 |
|        | 667.1972433 | 671.6285143 | 269.4662793 | 338.8974249 | 26473.42255 |
|        | 91.36792646 | 131.5732395 | 20536.85787 | 207.8915127 | 164.8463693 |
|        | 1389.417624 | 527.4082419 |             |             |             |
| IFI44L | 24.57422621 | 37.30993947 | 52.98873326 | 84.26221988 | 147.4365503 |
|        | 127.385545  | 18.32015721 | 132.631945  | 3323.895627 | 492.7938791 |
|        | 302.4006942 | 311.314882  | 307.8493777 | 12.5901686  | 6016.733404 |
|        | 984.7302507 | 11.03225551 | 4019.777684 | 81.33879659 | 95.98817333 |
|        | 165.2059275 | 74.97678161 |             |             |             |
| IFNA10 | 63.51120873 | 158.4224613 | 31.21088513 | 12.57137446 | 14.25566764 |
|        | 13.99751273 | 9.372947039 | 15.27320006 | 155.2422393 | 10.459288   |
|        | 8.565645005 | 13.16479841 | 13.10429637 | 10.54848621 | 8.485896389 |
|        | 7.997120003 | 21.86200716 | 8.554973126 | 31.31689645 | 22.44617229 |
|        | 11.35404201 | 20.7783228  |             |             |             |
| IFNG   | 233.2462403 | 168.0836515 | 137.3910104 | 249.0786281 | 107.3272359 |
|        | 142.1822906 | 6344.879706 | 208.3394234 | 174.2692818 | 269.3932002 |
|        | 247.3486217 | 3575.236664 | 108.1486375 | 105.0542732 | 96.36432219 |
|        | 71.1513012  | 75.83739524 | 92.78571972 | 109.1827541 | 70.32219401 |
|        | 157.0213934 | 187.1620872 |             |             |             |
| IGHD   | 10811.41236 | 2526.481303 | 21173.52695 | 62.3476822  | 125.466199  |
|        | 26.14159933 | 21.20380232 | 135.5693196 | 28.36731347 | 27.10540257 |
|        | 32.58210537 | 21.68739568 | 50.4303708  | 44.70050298 | 97.72702921 |
|        | 106.3962528 | 78.42668997 | 56.63839916 | 32.60266038 | 30.03853946 |
|        | 257.5071029 | 79.25564732 |             |             |             |
| IGHE   | 18.17410575 | 73.92464991 | 4949.619115 | 15.63289317 | 46.81934    |
|        | 54.27863199 | 23.03809769 | 51.74744263 | 18.57562555 | 28.07995577 |
|        | 19.3650878  | 15.52894714 | 25.291882   | 23.51249171 | 11.92870205 |
|        | 16.09778833 | 36.23816826 | 14.94842    | 67.3916899  | 25.52891416 |
|        | 62.78628164 | 45.89295939 |             |             |             |
| IGHM   | 21960.79819 | 14250.20741 | 31273.67963 | 361.7379219 | 46.93569691 |
|        | 156.9391502 | 260.5780432 | 2116.005563 | 593.8569709 | 226.0772361 |
|        | 162.309451  | 134.8648186 | 127.0436672 | 32.10709446 | 32.67724104 |
|        | 26.51832445 | 44.41793335 | 41.25586808 | 70.02577331 | 41.64994169 |
|        | 834.002996  | 98.13122154 |             |             |             |
| IGKC   | 27164.52012 | 30254.0679  | 36524.44074 | 3097.474216 | 489.1798399 |
|        | 40.36292074 | 67.88787751 | 329.5978842 | 351.6837529 | 2059.744494 |

|         |             |             |             |             |             |
|---------|-------------|-------------|-------------|-------------|-------------|
|         | 324.3571791 | 121.6124805 | 318.0695055 | 78.07530888 | 235.9541063 |
|         | 170.8361038 | 64.18688874 | 223.333702  | 100.706419  | 162.9166765 |
|         | 1108.467068 | 119.9968023 |             |             |             |
| IGLL3P  | 6633.535586 | 8962.420222 | 42851.28444 | 217.4652812 | 18.00926412 |
|         | 41.51758679 | 96.40860336 | 50.27476208 | 551.6984117 | 36.19278033 |
|         | 33.45486904 | 62.78986393 | 70.0394246  | 45.93797103 | 157.7551766 |
|         | 102.1260256 | 159.0326323 | 142.2968228 | 37.36510829 | 56.06416798 |
|         | 80.27971882 | 83.43489613 |             |             |             |
| IGSF6   | 46.07125476 | 70.4016677  | 65.01794569 | 27.09871228 | 40.17569562 |
|         | 48.71083673 | 35.64452519 | 27.93727573 | 56.76437031 | 137.7959697 |
|         | 100.2893009 | 74.41451203 | 2662.140929 | 6076.582495 | 295.0724091 |
|         | 1626.552661 | 3679.737192 | 1231.557711 | 156.3302861 | 366.6351782 |
|         | 246.6944983 | 4222.728231 |             |             |             |
| IL12B   | 105.275436  | 89.59925365 | 56.97214117 | 41.94288686 | 28.4476789  |
|         | 59.255418   | 77.91715796 | 42.09518393 | 43.47558877 | 84.12179397 |
|         | 85.58316556 | 56.90002211 | 42.42610973 | 43.55770236 | 513.0848293 |
|         | 18.65300514 | 73.47854562 | 2407.546497 | 38.07655929 | 72.40950258 |
|         | 68.62419013 | 127.5501333 |             |             |             |
| IL12RB2 | 13.44126834 | 18.33818525 | 13.07042258 | 95.11508424 | 33.86467066 |
|         | 106.8888316 | 726.4496109 | 117.5335217 | 219.4383155 | 386.7126926 |
|         | 594.0469774 | 1531.023729 | 20.50390251 | 19.79170172 | 14.52740162 |
|         | 43.64768257 | 14.03060068 | 10.65230466 | 39.54913244 | 31.27438783 |
|         | 11.68834565 | 14.16736964 |             |             |             |
| IL17A   | 24.10976356 | 31.66676526 | 13.1991983  | 7.018701499 | 6.547727883 |
|         | 6.560415317 | 294.032794  | 69.2200367  | 11.18736285 | 18.32724833 |
|         | 9.511607877 | 8.087608443 | 7.929351943 | 7.622591789 | 11.84351258 |
|         | 5.797213647 | 7.653355249 | 8.556203816 | 12.06834847 | 20.20321364 |
|         | 8.063350097 | 39.5476383  |             |             |             |
| IL18R1  | 32.74521328 | 56.21530515 | 34.90083093 | 197.574303  | 73.22426678 |
|         | 243.8532814 | 400.3612339 | 119.2372786 | 512.4917243 | 1022.471148 |
|         | 829.4466231 | 1084.441173 | 19.50301241 | 19.54166867 | 7.9840431   |
|         | 32.56301861 | 22.9410599  | 21.814318   | 1442.746463 | 2220.298354 |
|         | 1494.967961 | 516.0935366 |             |             |             |
| IL18RAP | 63.16533501 | 45.38600163 | 22.92310159 | 541.6070596 | 83.75974388 |
|         | 275.2312246 | 367.9599908 | 101.4843406 | 113.0686831 | 4488.262918 |
|         | 6172.262928 | 5732.166309 | 92.02184739 | 93.75421468 | 24.97523206 |
|         | 38.64095647 | 88.07756471 | 89.09515062 | 239.2744548 | 362.4767389 |
|         | 1797.696657 | 2653.493356 |             |             |             |
| IL1A    | 207.8094975 | 114.0328396 | 101.4843406 | 65.8236721  | 98.02150804 |
|         | 89.41077945 | 147.6537197 | 52.93205499 | 47.70844227 | 104.0011372 |
|         | 81.80415638 | 75.92997592 | 61.10993853 | 627.6075867 | 90.02342615 |
|         | 27.04752387 | 107.4684033 | 387.9719904 | 140.5103893 | 2906.366436 |
|         | 2009.795325 | 204.892697  |             |             |             |
| IL1B    | 508.1423339 | 364.9197528 | 198.7896427 | 144.2186891 | 136.961868  |
|         | 251.1017935 | 200.4208119 | 204.2875485 | 284.0853434 | 352.1592413 |
|         | 250.0432905 | 241.5910262 | 1257.182131 | 1273.463059 | 675.1218227 |
|         | 291.824541  | 437.0700597 | 2781.903216 | 3282.430504 | 17770.60586 |

|        |             |             |             |             |             |
|--------|-------------|-------------|-------------|-------------|-------------|
|        | 1137.887994 | 3099.346146 |             |             |             |
| IL1RL1 | 161.2444569 | 100.3685885 | 109.8410784 | 34.56285806 | 19.32045331 |
|        | 70.12950502 | 95.88469778 | 69.00006431 | 60.40587603 | 98.27886377 |
|        | 65.350782   | 125.0829545 | 37.42366918 | 98.08944243 | 93.26068194 |
|        | 76.11959313 | 100.3189187 | 44.282995   | 730.4759326 | 1305.536765 |
|        | 971.1736917 | 102.9096081 |             |             |             |
| IL21   | 346.0439646 | 299.7702438 | 161.7246112 | 59.42001123 | 21.34280658 |
|        | 81.58442785 | 333.1909722 | 1466.934174 | 42.0591226  | 87.99639559 |
|        | 38.68027919 | 68.0390322  | 103.5720427 | 83.58872184 | 59.64008096 |
|        | 42.67287335 | 78.1233779  | 62.52092002 | 96.13005298 | 60.01519603 |
|        | 93.38643807 | 201.0983497 |             |             |             |
| IL26   | 6.120665994 | 7.623841163 | 26.26628742 | 7.410920044 | 7.902366544 |
|        | 9.532387256 | 273.5706061 | 116.5979064 | 20.82075804 | 10.73746674 |
|        | 7.691378335 | 5.136655175 | 3.424557859 | 2.491129956 | 4.330193687 |
|        | 4.366178616 | 4.355733897 | 4.531899492 | 3.032229715 | 38.01550446 |
|        | 4.776302225 | 4.557666573 |             |             |             |
| IL2RA  | 151.2654723 | 216.016679  | 79.81202979 | 85.8239546  | 87.16147336 |
|        | 360.4452087 | 4978.13072  | 184.4383466 | 3823.559035 | 31.18038026 |
|        | 42.04435301 | 628.1600217 | 25.41115885 | 33.9871692  | 3963.774053 |
|        | 146.4600699 | 44.95064885 | 2221.900378 | 193.2645954 | 310.0050923 |
|        | 133.8083659 | 31.22286334 |             |             |             |
| IL2RB  | 2118.459057 | 1945.518804 | 848.6873784 | 4000.216538 | 818.7927424 |
|        | 2988.605281 | 7562.491571 | 7279.249666 | 12662.47545 | 10958.76994 |
|        | 18026.39249 | 19190.61594 | 321.9612928 | 294.5506048 | 221.9788101 |
|        | 172.9682935 | 246.8795571 | 366.1434094 | 341.9687806 | 442.6048403 |
|        | 381.1943018 | 1044.851269 |             |             |             |
| IL3    | 20.12785138 | 12.58545616 | 13.81492461 | 9.157134905 | 9.485254596 |
|        | 8.603842518 | 1689.599596 | 15.86814667 | 37.29223107 | 5.976390119 |
|        | 13.59206642 | 28.81247015 | 11.52632712 | 9.762406535 | 10.04573553 |
|        | 7.30958941  | 9.891831901 | 12.94335151 | 8.370755211 | 411.2800676 |
|        | 112.5425353 | 12.25400672 |             |             |             |
| IL4    | 10.0823446  | 28.84260472 | 39.12138574 | 13.17067743 | 10.44585498 |
|        | 10.77863651 | 232.713076  | 118.0039289 | 31.86954261 | 32.63339605 |
|        | 12.25198156 | 9.624468251 | 8.872339575 | 7.664565106 | 8.673663183 |
|        | 7.429093546 | 9.549519912 | 9.284199738 | 7.282627513 | 10.14540159 |
|        | 52.56882157 | 34.58584621 |             |             |             |
| IL4R   | 11009.29392 | 1883.66674  | 291.1304361 | 884.659355  | 2125.328314 |
|        | 1148.814515 | 864.1960215 | 414.2300341 | 3102.322518 | 913.5881164 |
|        | 851.30019   | 1609.901147 | 1192.215763 | 1054.288345 | 3007.592556 |
|        | 846.6140012 | 1093.752458 | 2410.484546 | 3106.475575 | 4652.787414 |
|        | 1117.612583 | 2809.100785 |             |             |             |
| IL5    | 6.618252721 | 11.61192289 | 9.694581053 | 18.71157669 | 11.36906118 |
|        | 35.07363094 | 159.9554562 | 28.07283413 | 86.16972173 | 34.7038725  |
|        | 8.169496573 | 13.81492461 | 11.47899088 | 11.32827552 | 48.58576071 |
|        | 18.8378526  | 15.96329864 | 22.53916948 | 12.570626   | 317.6908754 |
|        | 22.81507783 | 13.25903543 |             |             |             |
| IL5RA  | 122.2890422 | 101.5434264 | 197.2344989 | 42.9451164  | 26.5887412  |

|           |              |              |              |              |              |
|-----------|--------------|--------------|--------------|--------------|--------------|
|           | 63. 93112851 | 43. 62068846 | 32. 20308963 | 103. 1997215 | 118. 4320183 |
|           | 45. 67953351 | 44. 27072755 | 41. 02366335 | 36. 13968537 | 43. 73965746 |
|           | 22. 0447246  | 51. 58293868 | 55. 86616787 | 154. 5243618 | 105. 6851394 |
|           | 713. 1604697 | 256. 0574097 |              |              |              |
| IL7       | 250. 9247833 | 611. 4516464 | 40. 0906413  | 41. 57938135 | 34. 7070222  |
|           | 69. 25499148 | 30. 32542187 | 68. 38795936 | 43. 15687677 | 27. 39425876 |
|           | 24. 76130902 | 26. 22845437 | 51. 3943268  | 93. 50347161 | 133. 4873015 |
|           | 79. 20083093 | 68. 88084979 | 143. 5066148 | 55. 59054639 | 25. 03009419 |
|           | 18. 13188477 | 14. 89186794 |              |              |              |
| IL7R      | 277. 7164299 | 454. 5504216 | 126. 0983758 | 15195. 16858 | 19513. 31337 |
|           | 18085. 9446  | 1965. 113683 | 3066. 253514 | 507. 1604755 | 2118. 827609 |
|           | 1159. 340489 | 341. 6294609 | 163. 3050166 | 5078. 293455 | 2163. 365124 |
|           | 85. 59144108 | 2156. 179359 | 7799. 647099 | 36. 56114051 | 325. 7294175 |
|           | 358. 0842541 | 742. 6718185 |              |              |              |
| IL9       | 60. 05830259 | 42. 70618828 | 16. 73521702 | 43. 06562332 | 31. 36207011 |
|           | 89. 90011254 | 6525. 444386 | 46. 35002341 | 15. 37426695 | 47. 46140523 |
|           | 45. 8168679  | 31. 82797542 | 15. 74553195 | 22. 74633599 | 28. 83176888 |
|           | 10. 07084824 | 31. 51470707 | 34. 55584304 | 4. 125140757 | 15. 58698236 |
|           | 56. 79210664 | 24. 3295572  |              |              |              |
| IRF8      | 9506. 386392 | 7886. 092193 | 218. 3135972 | 350. 3493603 | 279. 6879535 |
|           | 45. 41225697 | 487. 5663213 | 610. 5494813 | 196. 6158219 | 992. 3568261 |
|           | 1625. 377439 | 2594. 872072 | 2458. 705658 | 1929. 656915 | 12117. 94539 |
|           | 3495. 416283 | 1652. 355711 | 2798. 258545 | 363. 7262259 | 798. 9447795 |
|           | 519. 9851623 | 281. 068165  |              |              |              |
| ITK       | 468. 9985735 | 409. 7558423 | 192. 2179775 | 6471. 889098 | 9578. 936337 |
|           | 7704. 627853 | 3954. 854034 | 9006. 839826 | 7176. 363772 | 5787. 063934 |
|           | 3056. 935046 | 3981. 741268 | 124. 1014103 | 115. 0222464 | 90. 2244571  |
|           | 71. 26574474 | 102. 079759  | 166. 1778128 | 1344. 476541 | 1083. 589895 |
|           | 654. 6984165 | 380. 4695205 |              |              |              |
| KCNA3     | 306. 2764477 | 411. 3873405 | 1214. 683767 | 573. 9051164 | 465. 479642  |
|           | 975. 6549806 | 324. 103216  | 263. 9154835 | 74. 99289378 | 440. 6509136 |
|           | 411. 3943392 | 577. 1730417 | 143. 5528595 | 102. 9419725 | 129. 9134995 |
|           | 20. 61657512 | 23. 54471    | 24. 00174244 | 13. 81687679 | 18. 00422957 |
|           | 120. 5070417 | 65. 0351555  |              |              |              |
| KCNG2     | 12. 5310046  | 21. 62331457 | 203. 7216331 | 18. 15238454 | 7. 924164041 |
|           | 12. 07805481 | 12. 5310046  | 13. 09271261 | 7. 933580511 | 7. 281883852 |
|           | 17. 88167287 | 15. 86814667 | 18. 84293691 | 21. 28655105 | 32. 65230838 |
|           | 15. 93115384 | 16. 35770749 | 15. 52250872 | 18. 17240921 | 21. 55778412 |
|           | 26. 69902616 | 11. 70521171 |              |              |              |
| KIAA0226L | 7209. 224512 | 5267. 694585 | 147. 3808749 | 41. 69784069 | 82. 79229745 |
|           | 64. 8769987  | 50. 36671815 | 26. 53483439 | 87. 2937927  | 97. 05270244 |
|           | 54. 34410784 | 30. 36307028 | 176. 3964323 | 104. 5999421 | 210. 4700584 |
|           | 711. 6687161 | 61. 81257943 | 43. 42734643 | 108. 4065512 | 90. 21510801 |
|           | 435. 4505242 | 2046. 296729 |              |              |              |
| KIAA0754  | 9. 870549848 | 7. 165981269 | 4. 818030863 | 23. 11849958 | 80. 9645004  |
|           | 7. 879203828 | 4. 366178616 | 76. 11959313 | 56. 16728339 | 60. 22816379 |
|           | 151. 0455484 | 150. 2587239 | 44. 79047534 | 7. 819073969 | 414. 8050146 |



|         |             |             |             |             |             |
|---------|-------------|-------------|-------------|-------------|-------------|
|         | 157.7551766 | 7.952601123 | 4.64920776  | 7.690245228 | 54.64334078 |
|         | 85.39781903 | 7.870074424 |             |             |             |
| KIR2DL1 | 7.406441697 | 5.157127328 | 4.493181638 | 8.01647279  | 12.79241876 |
|         | 6.332890006 | 4.126234993 | 6.198523194 | 24.55389477 | 24.17768826 |
|         | 281.9844186 | 532.2521388 | 5.116435124 | 4.751833847 | 8.603842518 |
|         | 8.522115249 | 4.531899492 | 7.023482621 | 30.90286056 | 25.65281368 |
|         | 7.453176714 | 12.34421311 |             |             |             |
| KIR2DL4 | 331.7763894 | 242.5966898 | 326.5656738 | 122.2246008 | 125.3243228 |
|         | 79.00529624 | 62.54142777 | 71.00293957 | 119.6110333 | 247.0446849 |
|         | 602.9726262 | 1692.521387 | 128.8246048 | 99.74347628 | 300.0125058 |
|         | 75.07815363 | 110.773487  | 151.8311567 | 97.22199641 | 116.9912535 |
|         | 187.147452  | 282.8093    |             |             |             |
| KIR2DS4 | 621.6999538 | 437.1452806 | 512.4557638 | 280.1613018 | 113.6054513 |
|         | 120.4987696 | 87.81654144 | 129.4623262 | 189.8263758 | 544.8216867 |
|         | 1172.82887  | 3017.546724 | 129.0849772 | 114.1247729 | 136.0850535 |
|         | 62.96408983 | 137.3858092 | 106.7559176 | 147.351626  | 135.0551191 |
|         | 121.4465272 | 344.8539572 |             |             |             |
| KIR3DL2 | 12.24576038 | 10.57912504 | 7.59573833  | 22.06039056 | 14.16687271 |
|         | 9.251047619 | 13.16479841 | 9.926447424 | 30.03124066 | 214.4909511 |
|         | 511.2935608 | 1163.915182 | 11.38893073 | 9.60888568  | 28.01546378 |
|         | 13.76775417 | 10.64138208 | 9.637544809 | 17.20022019 | 14.72443266 |
|         | 13.64241979 | 20.01964437 |             |             |             |
| KIRREL  | 15.52894714 | 13.70655219 | 28.13135229 | 34.23347857 | 26.78347553 |
|         | 9.694581053 | 12.95560951 | 23.95290683 | 171.4659907 | 30.4285789  |
|         | 18.20868192 | 12.13897809 | 13.64075973 | 10.87526239 | 22.74378501 |
|         | 37.96319899 | 14.30574871 | 11.31192453 | 42.11575303 | 19.78886308 |
|         | 34.10168949 | 15.74318836 |             |             |             |
| KLRB1   | 119.5727193 | 241.3252476 | 39.37347577 | 8818.269216 | 317.5656356 |
|         | 10026.23944 | 500.6894521 | 4477.729529 | 1259.996581 | 12634.61161 |
|         | 12957.39238 | 5576.724303 | 90.24623781 | 26.68511703 | 33.3990692  |
|         | 13.5124231  | 94.79879985 | 37.00213293 | 37.48705237 | 72.13784357 |
|         | 276.4397193 | 322.6159656 |             |             |             |
| KLRC3   | 13.84066629 | 44.61637486 | 9.097003233 | 724.7758509 | 13.18858231 |
|         | 32.02053189 | 12.41173255 | 5.4425507   | 47.20920823 | 586.9379733 |
|         | 1485.991589 | 662.1427421 | 12.58558886 | 6.245979354 | 14.44417944 |
|         | 9.753147704 | 18.67641809 | 9.447726589 | 8.281151752 | 15.21430708 |
|         | 34.50130668 | 8.77366203  |             |             |             |
| KLRC4   | 68.25016134 | 85.07512829 | 24.46628657 | 218.1751146 | 48.80110093 |
|         | 17.67634993 | 22.20688826 | 9.624468251 | 33.76338165 | 124.8024312 |
|         | 205.1777143 | 119.9854466 | 20.05492885 | 24.93153862 | 17.06104789 |
|         | 6.458825767 | 10.4089605  | 5.35636677  | 14.14835289 | 12.25029921 |
|         | 4.900978773 | 44.4640693  |             |             |             |
| KLRD1   | 204.0068731 | 170.2059521 | 244.5489843 | 1670.271427 | 75.78362334 |
|         | 207.8812187 | 155.9617882 | 149.0261337 | 59.999115   | 3580.074313 |
|         | 7278.146564 | 6195.927488 | 81.02147756 | 53.17243141 | 62.89115552 |
|         | 75.6389405  | 88.95467091 | 61.79015112 | 69.9817193  | 47.96373123 |
|         | 58.50047382 | 195.370024  |             |             |             |

|          |             |             |             |             |             |
|----------|-------------|-------------|-------------|-------------|-------------|
| KLRF1    | 153.1504496 | 198.6098814 | 112.8639054 | 851.1875307 | 21.90774996 |
|          | 127.2371142 | 37.05749544 | 13.02444905 | 8.539704435 | 4962.361286 |
|          | 10475.7852  | 5911.213148 | 100.1145382 | 41.2903796  | 76.15970242 |
|          | 182.5359056 | 75.15348707 | 65.02829076 | 69.58226846 | 59.59794077 |
|          | 107.0253016 | 121.9079756 |             |             |             |
| KLRG1    | 1351.157456 | 1076.359373 | 482.7709118 | 3859.14824  | 467.4716087 |
|          | 1939.944493 | 275.5197677 | 283.2038076 | 373.3248469 | 4631.811312 |
|          | 1700.856514 | 912.2671752 | 305.4474128 | 270.2038954 | 253.1007469 |
|          | 148.5655127 | 250.0803963 | 224.2019093 | 1310.19144  | 1313.328247 |
|          | 448.570662  | 605.3949976 |             |             |             |
| KLRK1    | 670.2708554 | 280.4713279 | 77.84292347 | 8228.460511 | 353.8455751 |
|          | 276.2455792 | 69.14462123 | 105.1489388 | 44.32349787 | 5199.517616 |
|          | 8790.503534 | 5454.73273  | 78.91616578 | 44.14759366 | 38.56086836 |
|          | 62.47198947 | 71.21203215 | 47.2591819  | 88.01964485 | 77.98871131 |
|          | 441.4201255 | 246.4439838 |             |             |             |
| KRT18P50 | 23.97041806 | 28.15146632 | 87.81654144 | 23.80795592 | 44.1209146  |
|          | 22.87490438 | 18.71219759 | 30.47049066 | 73.21035599 | 162.0879363 |
|          | 23.74696304 | 16.91790381 | 58.20626127 | 20.18111153 | 56.97214117 |
|          | 20.17213484 | 10.05531958 | 51.62553838 | 14.97730628 | 18.08634139 |
|          | 163.0384385 | 68.38796964 |             |             |             |
| KYNU     | 296.2994306 | 573.2552275 | 97.42434599 | 45.94858696 | 41.3563524  |
|          | 39.20610994 | 27.37818895 | 22.74378501 | 128.3281017 | 117.085962  |
|          | 70.07148215 | 66.70647411 | 858.7450615 | 3089.346164 | 6316.573655 |
|          | 1059.119128 | 1973.598471 | 7308.577846 | 132.0617598 | 327.6913744 |
|          | 62.48037948 | 100.1093538 |             |             |             |
| LAG3     | 36.29565926 | 8.732532802 | 10.14786303 | 521.3214165 | 6.264629561 |
|          | 175.1856105 | 999.6943311 | 1296.73277  | 656.8213603 | 884.9362538 |
|          | 139.8539928 | 23.50429099 | 7.92284356  | 6.759088639 | 1427.702674 |
|          | 97.67723625 | 20.86020976 | 215.1741661 | 12.7599446  | 22.32766244 |
|          | 5.070710836 | 8.170942175 |             |             |             |
| LAIR2    | 424.4791722 | 238.1828119 | 166.9553981 | 1078.390893 | 212.5228127 |
|          | 371.0335929 | 81.43053168 | 234.346304  | 3022.383345 | 1320.824363 |
|          | 1596.837227 | 1637.522871 | 103.0030242 | 85.54718583 | 207.8812187 |
|          | 88.73958185 | 96.22686841 | 78.2599751  | 85.27872952 | 114.86678   |
|          | 376.2549058 | 260.8513758 |             |             |             |
| LAMP3    | 47.28278554 | 46.66817965 | 128.4317353 | 134.7841361 | 120.9265077 |
|          | 160.3048593 | 368.6319956 | 165.5835013 | 264.0396917 | 132.2010638 |
|          | 210.8261404 | 418.7096295 | 38.76231871 | 316.7767691 | 17116.19562 |
|          | 113.1413857 | 1014.136741 | 23356.30643 | 81.94628982 | 130.0600242 |
|          | 540.5707204 | 320.9232259 |             |             |             |
| LAT      | 157.4129632 | 133.1507052 | 111.4231016 | 3224.978584 | 5669.605245 |
|          | 3282.260737 | 1447.742457 | 8480.619457 | 3200.697142 | 2738.316414 |
|          | 1722.578313 | 1262.245177 | 239.5833162 | 603.6863585 | 162.813157  |
|          | 181.9526719 | 205.2650782 | 218.7467931 | 3738.758621 | 2477.465096 |
|          | 405.7028156 | 209.6546017 |             |             |             |
| LCK      | 337.4400897 | 327.1096376 | 40.80982734 | 8763.864592 | 8948.349603 |
|          | 7786.120969 | 4042.377012 | 9578.936337 | 6736.744097 | 4299.610023 |

|           |             |             |             |             |             |
|-----------|-------------|-------------|-------------|-------------|-------------|
|           | 3604.565205 | 2808.159439 | 80.75884433 | 64.45522652 | 25.99553349 |
|           | 22.85969301 | 43.79168499 | 57.6156067  | 33.89599017 | 20.84968098 |
|           | 245.2328838 | 186.8691266 |             |             |             |
| LEF1      | 30.90820518 | 28.4865918  | 56.48122719 | 1204.840659 | 2704.715795 |
|           | 1154.223661 | 412.9279657 | 495.8728917 | 364.8725487 | 144.3431401 |
|           | 115.1927029 | 115.8526336 | 12.54164279 | 11.51825528 | 11.83156209 |
|           | 15.80624293 | 11.61178237 | 16.8510481  | 20.33091749 | 18.49440463 |
|           | 107.1460636 | 31.2755148  |             |             |             |
| LHCGR     | 154.6890469 | 195.3792191 | 59.39944184 | 9.897454754 | 24.46628657 |
|           | 8.255798098 | 5.598819437 | 9.419742658 | 139.0898849 | 126.933563  |
|           | 21.7148195  | 26.06781415 | 11.47012114 | 31.7588928  | 23.03809769 |
|           | 22.03161941 | 20.63736847 | 21.31678215 | 31.75279947 | 22.23624099 |
|           | 51.25024965 | 82.91574196 |             |             |             |
| LILRA2    | 20.88194891 | 19.97153628 | 13.23730918 | 20.16252339 | 27.39864055 |
|           | 18.02258618 | 13.56995609 | 14.6382422  | 11.58792629 | 151.8492133 |
|           | 101.3950793 | 38.77174192 | 1764.823942 | 852.0801094 | 317.6856228 |
|           | 220.1788316 | 135.3143975 | 67.56872756 | 133.8752859 | 107.1102323 |
|           | 283.3313914 | 2439.781118 |             |             |             |
| LILRA3    | 7.153043448 | 6.787328787 | 5.58378914  | 9.02114446  | 28.11270143 |
|           | 6.052620848 | 7.382940272 | 5.625148525 | 40.72087151 | 19.25297574 |
|           | 20.37949338 | 12.10187282 | 880.456908  | 53.4640133  | 973.1747582 |
|           | 154.5203653 | 27.05609175 | 394.9475489 | 37.57554618 | 18.25338212 |
|           | 81.14096204 | 117.4599802 |             |             |             |
| LILRA4    | 33.02123349 | 111.7082404 | 65.08699055 | 24.77824314 | 17.45746015 |
|           | 57.84876862 | 18.43170071 | 9.669430796 | 500.1910895 | 40.01532931 |
|           | 19.49828414 | 18.12117817 | 65.68769791 | 44.41590756 | 92.50411622 |
|           | 38.58613078 | 34.16139145 | 31.18408975 | 15.20381774 | 8.331049833 |
|           | 15.63266643 | 63.10838368 |             |             |             |
| LILRB2    | 30.88657745 | 28.11397271 | 15.56608274 | 25.57422148 | 6.646385161 |
|           | 9.996682874 | 9.085608856 | 12.43682411 | 61.89822691 | 357.618743  |
|           | 201.7195756 | 36.09030097 | 3344.118855 | 541.4074958 | 4796.504314 |
|           | 1185.826811 | 250.1929104 | 291.7908682 | 334.3576063 | 328.4510229 |
|           | 1013.349786 | 2905.942642 |             |             |             |
| LIME1     | 23.92087663 | 43.82308141 | 1021.385341 | 1287.731562 | 995.0546469 |
|           | 1225.59738  | 171.9065402 | 801.8866109 | 383.1735043 | 666.8094476 |
|           | 181.4780792 | 47.46263396 | 78.16252525 | 41.8287759  | 34.53702578 |
|           | 50.33543999 | 42.42770527 | 48.5118084  | 45.04108146 | 104.2880897 |
|           | 52.56517195 | 79.53831265 |             |             |             |
| LINC00597 | 15.98296208 | 18.32668535 | 7.214039616 | 6.841729202 | 60.43870697 |
|           | 3.681017104 | 3.720542522 | 33.95721509 | 12.93495387 | 65.41694292 |
|           | 128.013785  | 72.72761985 | 23.18626902 | 11.37053999 | 87.56074506 |
|           | 126.3468697 | 7.572513244 | 6.369784788 | 68.98009213 | 313.742119  |
|           | 142.3813574 | 20.71458679 |             |             |             |
| LINC00921 | 675.1218227 | 227.5869807 | 145.5963793 | 132.8112012 | 40.64411705 |
|           | 146.1436716 | 22.79147187 | 103.3123673 | 71.61705409 | 70.88276404 |
|           | 116.2458441 | 70.47336347 | 69.03803764 | 21.48566946 | 43.47348792 |
|           | 70.79707101 | 21.81066603 | 30.69076634 | 24.93138681 | 87.94657299 |

|              |             |             |             |             |             |
|--------------|-------------|-------------|-------------|-------------|-------------|
|              | 427.5881941 | 287.709765  |             |             |             |
| LOC100130100 | 19.84751256 | 28.75087131 | 7525.221652 | 23.05076042 |             |
|              | 19.12046512 | 16.09778833 | 15.86814667 | 17.16741792 | 12.23607915 |
|              | 17.14185375 | 10.35285767 | 14.70906515 | 16.13831431 | 13.76101418 |
|              | 15.93115384 | 14.61435957 | 16.1139255  | 15.35656506 | 18.81189118 |
|              | 13.06014039 | 15.57160381 | 17.23014635 |             |             |
| LOC126987    | 135.5693196 | 103.5430592 | 195.6949202 | 72.45319298 | 106.3115117 |
|              | 91.28169833 | 101.1966631 | 23.60168909 | 749.8002383 | 23.76710847 |
|              | 86.37729281 | 76.62216013 | 68.19210687 | 49.24995457 | 120.1283625 |
|              | 101.4058634 | 85.34834978 | 91.89975985 | 52.82210885 | 25.0176638  |
|              | 72.26321114 | 91.27327826 |             |             |             |
| LRMP         | 2106.83981  | 2947.585258 | 1042.751166 | 631.9125478 | 861.6605651 |
|              | 327.4987971 | 185.1858088 | 2003.326231 | 135.9692767 | 613.0798899 |
|              | 1245.630394 | 436.5800269 | 1048.681062 | 155.3040258 | 38.79936244 |
|              | 773.4916653 | 535.9059585 | 114.6747087 | 727.1797268 | 621.2830904 |
|              | 6331.426168 | 3231.634624 |             |             |             |
| LST1         | 29.98420127 | 20.94422774 | 39.94821809 | 520.3780954 | 264.6015763 |
|              | 332.3730932 | 131.0995558 | 36.87140683 | 71.2981542  | 1394.203591 |
|              | 672.9594285 | 291.3221307 | 5975.189254 | 2191.478522 | 2243.545374 |
|              | 2286.079952 | 3691.087351 | 946.6004764 | 1224.997584 | 1641.972335 |
|              | 4186.037105 | 9953.015759 |             |             |             |
| LTA          | 11.68110017 | 12.01527664 | 12.60267124 | 21.16573991 | 258.3876509 |
|              | 27.69750654 | 2867.607058 | 524.4770391 | 138.2988262 | 13.28187351 |
|              | 24.18839952 | 2880.862643 | 12.51621864 | 12.5287015  | 114.1041953 |
|              | 14.98197508 | 14.60038983 | 12.82463268 | 12.95614608 | 17.78813205 |
|              | 26.31845898 | 16.83523098 |             |             |             |
| LTB          | 10351.64143 | 12117.94539 | 106.6290931 | 9829.724672 | 13247.62405 |
|              | 12009.36242 | 5257.453469 | 9725.14216  | 17485.2086  | 3372.608476 |
|              | 1009.906661 | 16862.16904 | 321.3564756 | 127.317149  | 116.2863022 |
|              | 161.002021  | 184.5481051 | 112.0607213 | 222.2586327 | 400.9057785 |
|              | 2136.992363 | 5458.249488 |             |             |             |
| LTC4S        | 61.1295924  | 25.94383276 | 66.32500458 | 132.3582101 | 77.11890893 |
|              | 78.40840372 | 50.09224489 | 112.5148376 | 13.48887099 | 117.9338674 |
|              | 162.8566162 | 97.97552647 | 91.87551209 | 110.0952748 | 145.9248694 |
|              | 581.6689523 | 224.3289545 | 67.02300291 | 1156.117714 | 1035.91691  |
|              | 595.9161078 | 114.1929024 |             |             |             |
| LY86         | 6947.982466 | 7763.972248 | 815.0088739 | 382.951912  | 398.8717851 |
|              | 198.5520941 | 176.7444504 | 208.4980914 | 379.3366843 | 1584.314572 |
|              | 243.1158973 | 224.0756082 | 5218.063407 | 1832.781159 | 1246.621776 |
|              | 6395.572444 | 1997.214217 | 601.1020453 | 297.4214468 | 221.121219  |
|              | 654.4709644 | 691.7851206 |             |             |             |
| LY9          | 289.0732036 | 607.833791  | 552.0344178 | 1310.964334 | 1851.721168 |
|              | 1298.433446 | 51.04583679 | 979.0134027 | 199.2633251 | 1132.316757 |
|              | 271.972779  | 28.5057754  | 30.00087721 | 34.01455014 | 28.29412112 |
|              | 252.2799806 | 74.17751535 | 32.7996725  | 53.62595267 | 25.98366937 |
|              | 71.60927294 | 59.93806713 |             |             |             |
| MAGEA11      | 21.99996581 | 32.72734275 | 33.69520426 | 20.72781035 | 9.272327825 |

|         |             |             |             |             |             |
|---------|-------------|-------------|-------------|-------------|-------------|
|         | 46.81934    | 31.49065027 | 14.26798853 | 78.55197164 | 84.08511613 |
|         | 19.87971163 | 10.00970252 | 5.93274616  | 8.165451989 | 6.881696305 |
|         | 5.473565526 | 12.44081637 | 7.145470373 | 5.96527055  | 28.6908932  |
|         | 54.72137242 | 18.05763943 |             |             |             |
| MAK     | 20.11347878 | 20.28901775 | 15.05714204 | 8.152190939 | 13.44126834 |
|         | 9.822978292 | 40.92391452 | 13.84066629 | 9.960118091 | 22.0750038  |
|         | 11.47152467 | 14.95790508 | 24.81417634 | 11.76696799 | 40.72370334 |
|         | 106.2299542 | 13.83006736 | 54.01241952 | 27.90947126 | 58.25891278 |
|         | 356.3243879 | 1120.128556 |             |             |             |
| MAN1A1  | 293.5258353 | 262.0187671 | 4141.039248 | 239.4182791 | 96.36432219 |
|         | 219.4246857 | 337.6772681 | 280.6334531 | 242.0517762 | 294.362322  |
|         | 381.9911766 | 308.6636084 | 205.5255231 | 541.5412754 | 493.8657698 |
|         | 534.8061268 | 366.5485771 | 444.6270407 | 641.7452468 | 519.5952215 |
|         | 169.353094  | 662.1081563 |             |             |             |
| MANEA   | 3.436589508 | 17.60224736 | 658.3410173 | 52.68877507 | 48.36415338 |
|         | 63.61546587 | 343.1966006 | 85.74723008 | 33.23629102 | 24.98200909 |
|         | 72.1721013  | 132.9727705 | 67.09972733 | 120.265675  | 81.69270078 |
|         | 117.0081644 | 111.351923  | 130.2198315 | 87.12900391 | 34.12837499 |
|         | 4.4501978   | 3.047541504 |             |             |             |
| MAP3K13 | 5.152513024 | 4.887907798 | 10.45807901 | 7.381955365 | 8.886630463 |
|         | 6.382539853 | 7.500776659 | 4.945111836 | 9.244897824 | 6.502030229 |
|         | 7.176074961 | 6.292627292 | 7.051783275 | 7.239320879 | 37.08407242 |
|         | 7.843078446 | 7.964226977 | 195.7507332 | 5.545198276 | 6.098718067 |
|         | 7.766884131 | 7.993696005 |             |             |             |
| MAP4K1  | 48.65001463 | 923.4585215 | 201.4645711 | 1721.22046  | 2431.498593 |
|         | 1387.561664 | 1231.701055 | 4278.451524 | 2031.177327 | 1550.102008 |
|         | 747.3149188 | 451.4493332 | 317.9668785 | 25.60814698 | 31.1038533  |
|         | 367.2710553 | 58.98386899 | 23.10683533 | 361.741886  | 310.297677  |
|         | 272.9729346 | 35.18234699 |             |             |             |
| MAP4K2  | 10.65044684 | 12.63242373 | 8.427360618 | 17.70603378 | 144.6964726 |
|         | 20.0115018  | 85.19343142 | 16.98151569 | 32.11507998 | 10.77970448 |
|         | 11.12538801 | 10.43288028 | 12.04202684 | 15.05384266 | 9.050871942 |
|         | 11.5997819  | 11.28413666 | 11.22679921 | 8.807533308 | 10.13352773 |
|         | 10.82778318 | 12.24076681 |             |             |             |
| MAP9    | 10.29840785 | 13.08373168 | 8.288872254 | 93.40076641 | 96.15733766 |
|         | 25.30523597 | 55.74523407 | 64.48080982 | 22.3116708  | 3.353565773 |
|         | 37.63679768 | 43.71021332 | 1.421006596 | 2.140728959 | 2.387820415 |
|         | 3.785240835 | 2.574327617 | 2.772555856 | 2.778249883 | 2.815665601 |
|         | 8.739231654 | 2.738399982 |             |             |             |
| MARCH3  | 611.9846331 | 264.9416398 | 286.0949186 | 78.87501105 | 110.8989432 |
|         | 78.59525306 | 79.73662851 | 183.64099   | 205.2571817 | 85.76984856 |
|         | 190.5710992 | 194.2572943 | 103.5658121 | 175.8754876 | 328.0740952 |
|         | 56.54869661 | 138.0560759 | 125.2511774 | 1744.531054 | 2814.293695 |
|         | 1152.378442 | 205.0752959 |             |             |             |
| MARCO   | 9.029403736 | 10.74173048 | 14.46846851 | 14.45792523 | 38.56086836 |
|         | 10.71025113 | 14.49169961 | 24.0051092  | 27.25608933 | 12.81976422 |
|         | 16.1160018  | 13.72935017 | 236.7362055 | 2418.052513 | 48.77266347 |

|        |             |             |             |             |             |
|--------|-------------|-------------|-------------|-------------|-------------|
|        | 117.1511345 | 17.52051452 | 15.15488638 | 14.22873553 | 26.61544932 |
|        | 21.0620827  | 14.64273507 |             |             |             |
| MAST1  | 9.251047619 | 14.90583928 | 845.8491856 | 6.640168162 | 10.18494196 |
|        | 8.220261044 | 11.14631073 | 19.18028488 | 18.85451819 | 8.103482987 |
|        | 10.71480628 | 7.644655016 | 8.492607794 | 7.33322736  | 9.151450435 |
|        | 8.533286435 | 7.34003434  | 7.654391457 | 28.7744498  | 20.84717616 |
|        | 15.59997418 | 23.9863503  |             |             |             |
| MBL2   | 59.05366978 | 96.12663648 | 15.69138202 | 2.661464134 | 21.37467901 |
|        | 6.171513508 | 3.594013    | 3.740216058 | 133.631472  | 38.13537967 |
|        | 14.15214366 | 6.332890006 | 4.939369175 | 9.464931333 | 5.398099627 |
|        | 9.195676707 | 8.24077408  | 23.80513621 | 4.872899118 | 5.575591779 |
|        | 2.332247338 | 21.75446848 |             |             |             |
| MEFV   | 27.28348256 | 27.22990284 | 14.24242632 | 10.29578093 | 7.225818568 |
|        | 12.67206304 | 8.23248634  | 11.65755142 | 14.7398934  | 44.28123628 |
|        | 19.76334445 | 14.76826697 | 552.7124986 | 12.49592782 | 10.0823446  |
|        | 9.173433177 | 11.06899545 | 10.86423794 | 18.06194726 | 16.27540589 |
|        | 21.01530154 | 871.8164344 |             |             |             |
| MEPIA  | 939.6261506 | 391.2004498 | 222.3862967 | 54.17625589 | 22.42983417 |
|        | 141.2290524 | 43.13043305 | 54.92226784 | 169.5472888 | 136.1749837 |
|        | 85.62849683 | 89.41077945 | 98.26125945 | 171.9329356 | 25.48235387 |
|        | 66.46616213 | 186.6180666 | 321.8834531 | 25.29772111 | 96.70274469 |
|        | 257.5044339 | 165.3704727 |             |             |             |
| MGAM   | 8.043975587 | 5.311140732 | 5.166817607 | 3.964324624 | 4.929861418 |
|        | 6.159428432 | 5.092351833 | 5.783504523 | 9.150127078 | 48.51372535 |
|        | 314.5412721 | 47.87522011 | 159.713285  | 14.13313291 | 5.166817607 |
|        | 5.665802146 | 8.88168871  | 6.625392634 | 234.352858  | 137.7165021 |
|        | 609.1830453 | 5009.465768 |             |             |             |
| MICAL3 | 328.9820884 | 319.7728118 | 89.29505406 | 100.6010965 | 19.30656418 |
|        | 126.6902267 | 131.4519579 | 93.58629209 | 14.43318731 | 38.76021394 |
|        | 40.04773519 | 117.9119847 | 15.57018571 | 19.84503831 | 25.35785089 |
|        | 17.81194748 | 21.72023967 | 22.58563747 | 150.5320494 | 127.6291786 |
|        | 47.68240621 | 10.63927101 |             |             |             |
| MMP12  | 746.9258791 | 488.893271  | 163.9010445 | 79.27159307 | 52.70903607 |
|        | 114.8747346 | 105.1489388 | 81.69270078 | 265.1392895 | 233.2582309 |
|        | 98.16379    | 84.9536497  | 95.85109514 | 243.058639  | 399.1895721 |
|        | 221.5740634 | 15992.46965 | 3929.353984 | 207.7939338 | 2823.785573 |
|        | 241.2406344 | 296.4122687 |             |             |             |
| MMP25  | 136.2875659 | 125.5332669 | 196.2250897 | 211.5319494 | 232.4626329 |
|        | 168.1540221 | 115.6721617 | 162.7569122 | 370.1045701 | 134.7329729 |
|        | 149.937847  | 457.3283307 | 446.4796965 | 119.3129296 | 1099.921767 |
|        | 583.9384858 | 563.3057559 | 1130.6098   | 147.1246374 | 181.1486053 |
|        | 1253.630786 | 4281.638501 |             |             |             |
| MMP9   | 338.94428   | 388.1056494 | 357.9745698 | 286.9137339 | 359.6153524 |
|        | 395.4202673 | 258.4783862 | 424.4791722 | 396.8938938 | 338.8946519 |
|        | 688.2490954 | 284.1304512 | 335.4295326 | 38944.01868 | 2727.981464 |
|        | 16386.05747 | 3188.623948 | 2899.726139 | 1191.482432 | 12655.47888 |
|        | 635.0862911 | 6429.776491 |             |             |             |

|        |                        |              |              |              |              |
|--------|------------------------|--------------|--------------|--------------|--------------|
| MNDA   | 29. 5032353            | 276. 0791648 | 5. 02270779  | 50. 81863936 | 9. 217386051 |
|        | 8. 750532337           | 4. 525700455 | 13. 50066477 | 38. 28622427 | 2157. 226727 |
|        | 790. 3716005           | 301. 3206314 | 11447. 56145 | 2609. 874357 | 4016. 523813 |
|        | 1867. 617958           | 4559. 644609 | 2133. 559627 | 2154. 019115 | 1279. 186504 |
|        | 3154. 581987           | 22598. 07416 |              |              |              |
| MROH7  | 23. 05515036           | 26. 76307736 | 330. 0530055 | 28. 67423007 | 29. 60547378 |
|        | 31. 49065027           | 27. 55771004 | 33. 16402421 | 19. 72411436 | 52. 90645478 |
|        | 19. 11115142           | 24. 83406901 | 31. 92868262 | 30. 49050205 | 26. 72336531 |
|        | 24. 0216752            | 27. 38987274 | 29. 81710869 | 39. 08973983 | 67. 89494755 |
|        | 37. 2994064            | 35. 65136128 |              |              |              |
| MS4A1  | 18085. 9446            | 17478. 14564 | 396. 3913895 | 343. 9223112 | 52. 22897356 |
|        | 220. 8581711           | 125. 466199  | 112. 2871276 | 272. 6999955 | 505. 1556973 |
|        | 193. 3316222           | 177. 3861387 | 128. 6338935 | 31. 97803261 | 94. 49057817 |
|        | 64. 19016147           | 64. 56613288 | 122. 1899811 | 80. 29122433 | 52. 09389632 |
|        | 704. 4005013           | 274. 6589928 |              |              |              |
| MS4A2  | 151. 2024037           | 187. 5914373 | 119. 1973269 | 108. 6218788 | 99. 13536849 |
|        | 111. 3833723           | 94. 92027298 | 79. 20083093 | 67. 67598186 | 124. 4244268 |
|        | 93. 27967612           | 69. 18049192 | 52. 17720971 | 70. 5034722  | 67. 69994038 |
|        | 68. 77420162           | 73. 06314632 | 95. 08035664 | 4441. 180768 | 2673. 250779 |
|        | 321. 6586355           | 126. 264012  |              |              |              |
| MS4A3  | 121. 2914634           | 62. 7546875  | 60. 99801415 | 80. 86216165 | 8. 750532337 |
|        | 40. 41954215           | 20. 88194891 | 35. 12086261 | 36. 53908237 | 105. 015473  |
|        | 592. 6171613           | 191. 1348695 | 23. 55316735 | 7. 818215887 | 20. 77904136 |
|        | 38. 22269719           | 15. 87378625 | 21. 23223044 | 1963. 692404 | 893. 55158   |
|        | 1384. 096932           | 174. 6897078 |              |              |              |
| MS4A6A | 1102. 971199           | 616. 0957235 | 326. 3520803 | 221. 1962643 | 167. 8644908 |
|        | 216. 3694922           | 177. 7168106 | 149. 2510114 | 453. 0762101 | 2149. 718655 |
|        | 222. 7095319           | 191. 822788  | 8814. 800982 | 268. 5081463 | 402. 5623243 |
|        | 16167. 182 3743. 66762 | 167. 4361623 | 704. 4355853 | 501. 7726181 |              |
|        | 408. 7375549           | 1136. 619238 |              |              |              |
| MSC    | 28. 93411812           | 44. 52165409 | 115. 1532722 | 78. 78518268 | 42. 41248076 |
|        | 85. 70898291           | 243. 5748238 | 31. 95509978 | 172. 576955  | 132. 0717019 |
|        | 60. 98475714           | 42. 30368151 | 47. 46789206 | 631. 8453475 | 1562. 138826 |
|        | 101. 4843406           | 573. 3664602 | 1844. 921425 | 63. 76316724 | 148. 3606244 |
|        | 75. 28238775           | 111. 4753412 |              |              |              |
| MXD1   | 22. 77650595           | 22. 40684859 | 25. 96026018 | 67. 17780431 | 255. 8877786 |
|        | 110. 942725            | 65. 29264421 | 148. 9108567 | 94. 33865234 | 100. 6229174 |
|        | 201. 8229525           | 62. 75327788 | 250. 0158171 | 83. 19369257 | 135. 7286165 |
|        | 26. 56895465           | 18. 2441129  | 247. 6648431 | 27. 88347076 | 51. 87740674 |
|        | 1552. 584099           | 2389. 810861 |              |              |              |
| MYB    | 365. 4798555           | 297. 3542162 | 123. 9035186 | 647. 9999569 | 590. 5897003 |
|        | 269. 6240292           | 838. 0011211 | 1793. 189396 | 735. 501768  | 250. 0613928 |
|        | 615. 5214621           | 235. 7125916 | 300. 7619354 | 95. 31275979 | 78. 10250073 |
|        | 118. 9099184           | 97. 44739467 | 366. 9910132 | 4336. 138621 | 5021. 57244  |
|        | 3653. 922546           | 505. 0813817 |              |              |              |
| MZB1   | 46. 81934              | 122. 2593141 | 20117. 66469 | 42. 83903749 | 70. 2363913  |
|        | 9. 914966708           | 21. 78305128 | 18. 16093232 | 65. 46672008 | 62. 51579389 |

|           |              |              |              |              |              |
|-----------|--------------|--------------|--------------|--------------|--------------|
|           | 21. 76048739 | 26. 15989089 | 24. 85648896 | 22. 27069193 | 30. 4274162  |
|           | 33. 81911592 | 23. 21322482 | 22. 41174764 | 30. 79487517 | 29. 49339673 |
|           | 52. 52655798 | 29. 79626914 |              |              |              |
| NAALADL1  | 11. 62316713 | 15. 79395952 | 10. 56154776 | 70. 98305911 | 207. 9599013 |
|           | 147. 3280124 | 20. 45437223 | 150. 7507919 | 48. 57025297 | 62. 46833869 |
|           | 344. 9584692 | 228. 0189635 | 31. 52382891 | 14. 37732844 | 8. 288872254 |
|           | 10. 286083   | 7. 320372505 | 17. 6608551  | 8. 867943028 | 11. 21471067 |
|           | 15. 86794224 | 15. 89251626 |              |              |              |
| NCF2      | 153. 4955828 | 345. 1359814 | 194. 190923  | 62. 34284219 | 225. 0278308 |
|           | 88. 17850315 | 60. 47608557 | 68. 81156687 | 425. 6902381 | 1620. 910475 |
|           | 483. 3850653 | 168. 835817  | 12280. 85608 | 15650. 12064 | 762. 0351121 |
|           | 11487. 88902 | 11149. 65069 | 3147. 592954 | 956. 1678627 | 1619. 076321 |
|           | 20110. 62767 | 17226. 82018 |              |              |              |
| NCR3      | 152. 0118385 | 792. 8512873 | 42. 58445228 | 1756. 075472 | 250. 1023415 |
|           | 411. 610723  | 407. 2225704 | 201. 4043697 | 669. 2181531 | 1859. 555439 |
|           | 1482. 733424 | 3218. 191907 | 56. 94572009 | 30. 83325447 | 105. 9964013 |
|           | 55. 94701428 | 86. 33580407 | 33. 09868234 | 96. 4754312  | 83. 51655348 |
|           | 146. 729649  | 223. 2727212 |              |              |              |
| NFE2      | 6. 094544149 | 6. 768979235 | 11. 86713177 | 107. 3563954 | 48. 98562369 |
|           | 33. 47001344 | 7. 618893885 | 56. 38068068 | 67. 68355    | 79. 04536219 |
|           | 134. 3635052 | 82. 87062985 | 1517. 644033 | 30. 55010836 | 32. 42880369 |
|           | 110. 0759892 | 12. 40993727 | 11. 95985661 | 233. 7156172 | 148. 1955068 |
|           | 272. 8867403 | 2938. 86897  |              |              |              |
| NIPSNAP3B | 1577. 975004 | 744. 7742002 | 349. 550369  | 128. 0373349 | 41. 71079514 |
|           | 137. 6053305 | 86. 05619964 | 79. 24179515 | 106. 126089  | 497. 4339321 |
|           | 152. 7729655 | 105. 1928183 | 89. 57172242 | 79. 70267094 | 105. 2363956 |
|           | 106. 9349988 | 69. 48205189 | 124. 3434718 | 207. 1530615 | 142. 5503686 |
|           | 153. 9906407 | 331. 760106  |              |              |              |
| NKG7      | 6. 994769751 | 10. 33850341 | 7. 726182177 | 8640. 630717 | 106. 5387015 |
|           | 679. 6910465 | 947. 3726372 | 7. 582193721 | 18. 51226305 | 10086. 41757 |
|           | 13911. 17937 | 14574. 73469 | 34. 65463899 | 4. 93466715  | 217. 2245766 |
|           | 6. 547727883 | 4. 961302934 | 6. 557717872 | 429. 3526592 | 573. 0034371 |
|           | 24. 2643021  | 13. 31565465 |              |              |              |
| NLRP3     | 22. 14183418 | 20. 53269856 | 15. 37842878 | 15. 30576169 | 18. 45676256 |
|           | 48. 05321317 | 14. 17835244 | 11. 65755142 | 28. 04117893 | 51. 58523231 |
|           | 44. 60257144 | 88. 89574256 | 636. 6292677 | 32. 50574568 | 37. 67910545 |
|           | 322. 0620463 | 310. 2780778 | 19. 68892684 | 26. 84988325 | 423. 0729418 |
|           | 68. 36800786 | 478. 8774821 |              |              |              |
| NMBR      | 507. 384036  | 573. 6463176 | 242. 5274059 | 45. 63830073 | 8. 77366203  |
|           | 31. 0595517  | 92. 99539565 | 20. 04059624 | 117. 8521836 | 183. 1728448 |
|           | 29. 15508056 | 48. 05321317 | 77. 85728222 | 49. 44515642 | 16. 42178108 |
|           | 35. 1722477  | 81. 80338925 | 17. 42986379 | 11. 1988627  | 24. 63797792 |
|           | 103. 947176  | 201. 7522159 |              |              |              |
| NME8      | 4. 031081011 | 3. 928660473 | 3. 866557468 | 4. 66238798  | 6. 421545431 |
|           | 3. 210667699 | 3. 69898121  | 3. 740216058 | 11. 91914197 | 34. 0487377  |
|           | 253. 5462988 | 13. 4174629  | 14. 82529394 | 5. 97286223  | 97. 09045136 |
|           | 422. 959594  | 24. 14230852 | 7. 978826221 | 58. 47502369 | 23. 33658092 |



|         |             |             |             |             |             |
|---------|-------------|-------------|-------------|-------------|-------------|
|         | 117.6088791 | 10.36459567 |             |             |             |
| NOD2    | 6.932520098 | 10.18850108 | 224.3125249 | 8.398706067 | 8.568369563 |
|         | 124.1410057 | 147.9736788 | 116.1121546 | 42.78540525 | 146.6310156 |
|         | 178.2578801 | 166.0621042 | 1302.129171 | 91.56365214 | 2182.907505 |
|         | 811.2539416 | 31.53202085 | 249.2072515 | 31.6866415  | 7.939244863 |
|         | 617.7232142 | 689.3755544 |             |             |             |
| NOX3    | 12.00966261 | 6.682825624 | 6.670735069 | 7.382208399 | 8.615516504 |
|         | 9.107287855 | 7.489070848 | 8.533286435 | 5.486578437 | 66.24889709 |
|         | 7.475615219 | 7.106612265 | 11.17305851 | 7.877966901 | 9.70690203  |
|         | 8.992612544 | 6.581035841 | 7.139098203 | 133.3117235 | 215.5792618 |
|         | 6.271681559 | 15.12937746 |             |             |             |
| NPAS1   | 18.22767575 | 16.19541233 | 27.89933234 | 24.54202898 | 10.25273904 |
|         | 20.72030953 | 8.311325156 | 8.59290329  | 159.7592111 | 12.08977117 |
|         | 12.18029946 | 12.95560951 | 14.37797149 | 15.36265788 | 12.49569028 |
|         | 17.39161784 | 15.60612542 | 15.18946538 | 22.04957549 | 13.78738275 |
|         | 19.27166644 | 23.07570972 |             |             |             |
| NP1PB15 | 1624.147916 | 2800.237224 | 1335.65936  | 315.43784   | 11.1028997  |
|         | 753.235961  | 217.6161372 | 262.1479746 | 1476.413161 | 908.3810389 |
|         | 288.973686  | 230.6806713 | 176.7823779 | 212.5601012 | 282.2159665 |
|         | 370.1582078 | 246.2668474 | 154.0423997 | 82.55559576 | 173.8764126 |
|         | 399.8752628 | 1079.514585 |             |             |             |
| NPL     | 18.58723205 | 15.43171438 | 51.43557494 | 84.14120251 | 16.80025027 |
|         | 77.75838355 | 115.4350344 | 26.32189818 | 67.97537441 | 151.1552852 |
|         | 98.03373398 | 113.5081582 | 856.4061947 | 1653.078338 | 501.9616375 |
|         | 4287.536344 | 2046.531199 | 469.3198548 | 552.9189042 | 434.39859   |
|         | 1095.722226 | 2221.125735 |             |             |             |
| NR4A3   | 136.961868  | 146.6985292 | 133.9396044 | 83.36646929 | 117.4897219 |
|         | 96.79674591 | 315.2674688 | 165.5835013 | 462.3914642 | 158.621241  |
|         | 81.37480444 | 142.7268857 | 91.30097224 | 198.7422467 | 448.7091592 |
|         | 100.4851433 | 479.801155  | 2205.779288 | 126.340664  | 1237.55158  |
|         | 4000.433332 | 289.5950348 |             |             |             |
| NTN3    | 6.560415317 | 15.17015534 | 21.48427937 | 8.668709617 | 23.29056908 |
|         | 11.48733325 | 28.15146387 | 7.668026751 | 180.3938042 | 39.58499503 |
|         | 5.960532656 | 6.670735069 | 8.728208573 | 6.387053062 | 11.62316713 |
|         | 15.7165782  | 5.550003213 | 7.932018996 | 3.851996371 | 5.968588791 |
|         | 12.89560396 | 14.63118719 |             |             |             |
| NTRK1   | 13.56995609 | 13.73659599 | 28.05481762 | 10.62433837 | 22.8422122  |
|         | 15.01956589 | 21.08132558 | 9.834897324 | 11.27070692 | 17.70640663 |
|         | 9.510068915 | 13.60956204 | 11.91460935 | 8.11603997  | 8.77366203  |
|         | 8.95713845  | 14.87419345 | 8.220089782 | 353.8858453 | 1165.767806 |
|         | 24.83620744 | 16.05784624 |             |             |             |
| ORC1    | 23.68477152 | 41.00915539 | 30.47049066 | 48.78745757 | 40.53053139 |
|         | 49.69010165 | 571.8507896 | 149.8210195 | 27.67048227 | 17.56601887 |
|         | 28.16743979 | 199.5193663 | 42.26892867 | 50.27542876 | 21.53089091 |
|         | 49.33707158 | 43.52073776 | 20.24691855 | 138.2764869 | 141.3227716 |
|         | 139.6579855 | 15.70455066 |             |             |             |
| OSM     | 2.05303015  | 2.708641993 | 2.05303015  | 3.823397028 | 2.307902038 |

|              |              |              |              |              |
|--------------|--------------|--------------|--------------|--------------|
| 4. 818030863 | 45. 01752131 | 12. 94364358 | 142. 6507045 | 20. 55380014 |
| 2. 264192614 | 172. 7170749 | 4. 071675747 | 3. 540709893 | 3. 129845825 |
| 6. 319098182 | 10. 91034349 | 3. 537000212 | 13. 94683468 | 8. 408928144 |
| 1657. 870692 | 188. 2377246 |              |              |              |
| P2RX1        | 161. 7246112 | 37. 90926885 | 36. 61226829 | 180. 7978777 |
|              | 119. 891114  | 110. 7662487 | 142. 8858929 | 70. 45015588 |
|              | 133. 7653785 | 137. 761379  | 686. 8592062 | 198. 6785267 |
|              | 356. 2137024 | 162. 158759  | 57. 63014286 | 2865. 596717 |
|              | 1302. 716482 | 1169. 401245 |              | 2193. 457858 |
| P2RX5        | 9725. 14216  | 9116. 674392 | 2524. 75311  | 784. 9884834 |
|              | 770. 0178375 | 524. 8550881 | 2876. 602126 | 725. 3438736 |
|              | 507. 7460936 | 492. 8199974 | 175. 5409499 | 33. 05027296 |
|              | 20. 0115018  | 37. 21278271 | 35. 5352843  | 174. 3664719 |
|              | 355. 9021695 | 35. 46460502 |              | 298. 9924978 |
| P2RY10       | 436. 5800269 | 348. 9025998 | 408. 3799473 | 319. 1050423 |
|              | 516. 3687437 | 293. 2102273 | 313. 2896621 | 931. 7085834 |
|              | 236. 9914349 | 207. 4981375 | 20. 95780349 | 11. 36968834 |
|              | 16. 64319163 | 5. 340759621 | 142. 7074755 | 27. 33260384 |
|              | 1812. 068581 | 350. 0244998 |              | 59. 53712782 |
| P2RY13       | 9. 195676707 | 35. 59674022 | 8. 020483187 | 7. 470609935 |
|              | 6. 469992914 | 7. 274663001 | 6. 982740503 | 10. 2025435  |
|              | 76. 92819841 | 13. 81492461 | 2786. 279688 | 120. 6493256 |
|              | 2965. 888162 | 25. 78957652 | 8. 194297426 | 43. 78982454 |
|              | 1447. 836993 | 4885. 264485 |              | 60. 88154521 |
| P2RY14       | 1638. 857158 | 196. 0477382 | 30. 69853755 | 154. 8611784 |
|              | 75. 4038863  | 76. 77594259 | 33. 74435445 | 102. 9533339 |
|              | 214. 6448472 | 215. 2283477 | 51. 7107481  | 7. 681017154 |
|              | 852. 5563739 | 214. 7529288 | 24. 7275648  | 2202. 531209 |
|              | 9767. 658851 | 1604. 23718  |              | 1476. 439279 |
| P2RY2        | 11. 65755142 | 13. 6018949  | 9. 903062667 | 14. 97257129 |
|              | 11. 41545947 | 13. 35591205 | 20. 63255455 | 10. 1169561  |
|              | 14. 83438983 | 11. 91498962 | 172. 1808803 | 86. 58027686 |
|              | 9. 463569762 | 10. 69402254 | 14. 59353766 | 14. 46354526 |
|              | 944. 4078498 | 20. 46490608 |              | 89. 76543076 |
| PADI4        | 10. 86384541 | 14. 72490782 | 16. 99336407 | 54. 8131472  |
|              | 15. 94453415 | 24. 61338222 | 19. 92287086 | 9. 858987446 |
|              | 117. 7115047 | 26. 4439513  | 765. 8740271 | 15. 82068937 |
|              | 12. 5310046  | 21. 13767299 | 36. 58022188 | 110. 3487033 |
|              | 609. 7225739 | 834. 1791302 |              | 145. 7041526 |
| PAQR5        | 23. 55278029 | 20. 52510491 | 15. 54095466 | 14. 17914437 |
|              | 15. 95742958 | 14. 88173325 | 13. 05907552 | 36. 93744762 |
|              | 16. 92537277 | 12. 69616964 | 14. 23047428 | 301. 5136307 |
|              | 17. 46905843 | 19. 08196331 | 15. 76945271 | 367. 6396247 |
|              | 16. 33922468 | 21. 35009578 |              | 291. 658959  |
| PASK         | 513. 8685117 | 628. 0406815 | 674. 8353905 | 1441. 389436 |
|              | 2312. 349458 | 982. 6694359 | 7489. 424599 | 1422. 863691 |
|              | 194. 6949707 | 256. 2684015 | 146. 7089795 | 114. 1939024 |
|              |              |              |              | 1036. 993881 |
|              |              |              |              | 232. 6670491 |
|              |              |              |              | 240. 986393  |

|          |             |             |             |             |             |
|----------|-------------|-------------|-------------|-------------|-------------|
|          | 221.4207731 | 159.7552188 | 188.6396292 | 189.825041  | 170.7980542 |
|          | 412.5430957 | 260.1254538 |             |             |             |
| PAX7     | 67.60022415 | 81.26725901 | 281.5200465 | 23.31147251 | 25.73025482 |
|          | 42.55469556 | 34.32244633 | 37.98662268 | 107.1993296 | 47.57678524 |
|          | 13.99767158 | 21.90774996 | 38.03678229 | 20.55062936 | 24.24874392 |
|          | 19.33487809 | 32.20861554 | 32.68914412 | 22.88582143 | 40.26434744 |
|          | 82.85959644 | 43.89458066 |             |             |             |
| PBXIP1   | 399.906182  | 918.0224791 | 803.5855937 | 1520.324793 | 1070.73357  |
|          | 3186.537019 | 192.0869901 | 1612.60149  | 3045.590782 | 570.9583968 |
|          | 527.8700969 | 195.0766104 | 253.4748335 | 80.09674175 | 197.5776496 |
|          | 410.8735418 | 290.7321071 | 562.838958  | 173.2265498 | 203.1679252 |
|          | 835.0912646 | 980.0231145 |             |             |             |
| PCDHA5   | 5.122171371 | 7.929425728 | 11.42909979 | 15.43591938 | 25.92410763 |
|          | 33.86467066 | 7.73695061  | 11.02174746 | 107.6797892 | 43.8130913  |
|          | 10.21122017 | 11.39071505 | 10.28963858 | 10.55544651 | 85.93860365 |
|          | 8.255798098 | 13.64170835 | 6.045929382 | 10.74438293 | 6.114001431 |
|          | 10.27064822 | 12.67803161 |             |             |             |
| PDCD1    | 103.8732743 | 124.685259  | 105.4403669 | 153.8622347 | 130.6987203 |
|          | 149.0261337 | 234.7672258 | 2598.761593 | 263.9482706 | 208.0893621 |
|          | 128.5338061 | 122.4494002 | 153.2622842 | 114.2409952 | 134.5949207 |
|          | 133.0710845 | 111.798525  | 122.1858671 | 130.332615  | 95.2768144  |
|          | 223.7380224 | 277.5988266 |             |             |             |
| PDCD1LG2 | 17.24705732 | 11.81520376 | 12.20918656 | 12.8049967  | 15.10593558 |
|          | 11.03474465 | 14.41666747 | 8.147551977 | 75.96003159 | 15.66812358 |
|          | 22.01108215 | 12.92033658 | 14.01790012 | 55.0450855  | 448.8743703 |
|          | 343.4394084 | 116.3739956 | 813.7897771 | 9.979746792 | 18.43935219 |
|          | 72.1116222  | 22.62515879 |             |             |             |
| PDE6C    | 0.972464723 | 3.751282949 | 1.479085222 | 1.934003663 | 21.41944377 |
|          | 6.212037366 | 1.658857567 | 6.606824787 | 1.646250183 | 6.317187616 |
|          | 14.89875645 | 2.387820415 | 4.556478651 | 3.190692616 | 2.992189132 |
|          | 3.505149256 | 1.993538338 | 10.57243953 | 8.281616068 | 1.119174869 |
|          | 46.47392838 | 2.18143109  |             |             |             |
| PDK1     | 32.80967907 | 24.86674344 | 1399.416902 | 231.2949243 | 518.4525497 |
|          | 121.1522918 | 170.8986502 | 117.2961766 | 486.7488725 | 23.37025579 |
|          | 32.92518869 | 37.96319899 | 25.63097887 | 126.8741645 | 131.2576257 |
|          | 121.9445976 | 96.83583568 | 22.47364617 | 23.67746813 | 30.15639337 |
|          | 571.5173059 | 43.65251141 |             |             |             |
| PGLYRP1  | 18.90822468 | 23.3446173  | 20.11347878 | 9.957040446 | 9.789026033 |
|          | 15.62904812 | 16.08395924 | 19.77039029 | 12.62509239 | 16.07793448 |
|          | 99.27421716 | 30.4274162  | 13.97992365 | 13.38044445 | 12.64904623 |
|          | 15.47869427 | 11.05128893 | 16.05671329 | 237.8880314 | 262.4990034 |
|          | 752.182952  | 1587.726613 |             |             |             |
| PIK3IP1  | 2462.087898 | 1132.15121  | 728.3720212 | 5245.606657 | 5090.528151 |
|          | 4353.539533 | 461.309405  | 2315.263539 | 4814.01712  | 1330.849657 |
|          | 1203.06945  | 322.6103849 | 647.7544918 | 249.271088  | 209.4648222 |
|          | 1631.804333 | 295.0789727 | 259.7420759 | 557.4000388 | 310.2471426 |
|          | 780.1455706 | 545.6500777 |             |             |             |

|         |             |             |             |             |             |
|---------|-------------|-------------|-------------|-------------|-------------|
| PKD2L2  | 9.70690203  | 6.77668278  | 24.81718933 | 18.90534167 | 52.06339581 |
|         | 11.46263134 | 23.12217296 | 6.039291579 | 47.37634103 | 47.67860232 |
|         | 10.97872887 | 7.924164041 | 13.39656756 | 9.864099442 | 12.7431858  |
|         | 20.11347878 | 5.885376139 | 14.50853995 | 160.8584776 | 48.32066723 |
|         | 259.9512623 | 62.5622821  |             |             |             |
| PLA1A   | 35.62073897 | 28.11928425 | 15.15649598 | 16.1139255  | 16.45891984 |
|         | 7.843078446 | 14.26798853 | 19.93877192 | 16.46804088 | 31.59116116 |
|         | 25.1394749  | 12.84867382 | 59.35576681 | 26.2500019  | 2799.769624 |
|         | 14.40398388 | 38.04099365 | 647.1074354 | 48.99703525 | 43.37084455 |
|         | 53.1551885  | 26.03523647 |             |             |             |
| PLA2G7  | 100.7324553 | 79.06118962 | 69.94065389 | 24.31875779 | 12.76669965 |
|         | 36.51263796 | 39.26542516 | 37.60063067 | 108.8451808 | 178.7417662 |
|         | 73.09936856 | 50.30565877 | 1290.202807 | 10066.60469 | 1679.064856 |
|         | 1569.463396 | 5706.822398 | 5086.100024 | 1067.947829 | 980.107544  |
|         | 43.5153618  | 59.09237491 |             |             |             |
| PLCH2   | 31.91347153 | 14.44424591 | 32.27097928 | 26.92691404 | 169.1927281 |
|         | 136.8549573 | 42.93384847 | 176.0842582 | 981.1482044 | 71.66407227 |
|         | 152.093623  | 132.3765006 | 47.06577352 | 31.4082709  | 44.50406981 |
|         | 29.6256784  | 18.7750035  | 30.87091818 | 36.2777495  | 74.7391603  |
|         | 102.882811  | 101.4466056 |             |             |             |
| PLEKHF1 | 39.92144865 | 32.66376393 | 301.5187063 | 884.5112502 | 341.0076265 |
|         | 508.7385617 | 485.6449165 | 919.8846228 | 373.2850334 | 1042.95957  |
|         | 1513.840196 | 982.2000845 | 45.53332862 | 292.5202514 | 73.43952307 |
|         | 33.49248832 | 40.58425981 | 34.5707663  | 73.36688598 | 281.0035199 |
|         | 61.66664344 | 50.11176168 |             |             |             |
| PLEKHG3 | 11.39071505 | 10.80558704 | 11.07886417 | 293.5247521 | 76.73435744 |
|         | 559.7419793 | 106.6290931 | 26.01377304 | 17.7528531  | 927.8029843 |
|         | 855.4915686 | 317.7910043 | 417.6498993 | 137.0428414 | 590.7969437 |
|         | 180.2721835 | 25.67875771 | 21.42126529 | 204.7763582 | 37.68321735 |
|         | 1449.679742 | 1603.250854 |             |             |             |
| PMCH    | 12.39999002 | 10.5949733  | 16.56020185 | 7.056096164 | 12.96669349 |
|         | 14.81798486 | 138.142275  | 9.800664188 | 9232.536023 | 19.44909386 |
|         | 6.727160344 | 11.09025115 | 9.49164333  | 8.822055734 | 6.066370195 |
|         | 7.417755579 | 9.763369734 | 11.88490948 | 10.02000176 | 32.33716932 |
|         | 10.81046055 | 13.42857679 |             |             |             |
| PNOC    | 4198.527432 | 4255.796399 | 3031.838783 | 88.67789621 | 64.69325183 |
|         | 65.69416471 | 83.02319643 | 22.1078749  | 82.8028802  | 192.0353994 |
|         | 65.36645851 | 78.13755037 | 230.8474814 | 93.57509016 | 42.98994774 |
|         | 92.99539565 | 68.46161307 | 98.82686845 | 62.52678004 | 105.3515894 |
|         | 156.274342  | 269.3613294 |             |             |             |
| PPBP    | 112.7304414 | 89.83852158 | 166.6443042 | 61.67249965 | 65.62156196 |
|         | 58.2388091  | 20.89581929 | 63.64624142 | 117.7291809 | 476.6620695 |
|         | 37.90535113 | 17.49572851 | 80.46672814 | 3754.147483 | 230.1459177 |
|         | 292.9918215 | 91.22599046 | 211.9393609 | 78.2133217  | 1402.0838   |
|         | 52.02064599 | 564.5799005 |             |             |             |
| PPFIBP1 | 68.77420162 | 10.81398033 | 17.04707726 | 40.76620059 | 45.86348711 |
|         | 26.78347553 | 19.75629479 | 5.459102119 | 41.78961635 | 11.9742     |

|         |              |              |              |              |              |
|---------|--------------|--------------|--------------|--------------|--------------|
|         | 21. 69814253 | 9. 753147704 | 24. 45704984 | 36. 42488944 | 6. 90617027  |
|         | 11. 4758086  | 218. 6205764 | 76. 72712856 | 44. 20420842 | 30. 45109048 |
|         | 8. 539653683 | 12. 05579356 |              |              |              |
| PRF1    | 201. 9573668 | 236. 1351207 | 213. 4124783 | 8182. 518825 | 847. 8104385 |
|         | 2130. 073632 | 1288. 368436 | 953. 5011061 | 1643. 00791  | 15440. 12701 |
|         | 26164. 60132 | 27164. 52012 | 142. 7487889 | 88. 71604457 | 55. 13574502 |
|         | 23. 15489547 | 67. 86490889 | 103. 9210768 | 346. 3646077 | 285. 2205902 |
|         | 268. 3717602 | 422. 6697907 |              |              |              |
| PRG2    | 98. 84281244 | 125. 3109437 | 157. 5298559 | 126. 6467707 | 107. 0290453 |
|         | 139. 1010495 | 165. 4537351 | 35. 31282708 | 68. 52536924 | 16. 54700608 |
|         | 70. 81916153 | 82. 7123624  | 117. 086355  | 103. 3752118 | 295. 678865  |
|         | 263. 6529152 | 85. 47893602 | 89. 83062765 | 19061. 38442 | 20880. 60329 |
|         | 189. 2703998 | 59. 65270386 |              |              |              |
| PRR5L   | 114. 4648121 | 191. 9719939 | 14. 28013525 | 302. 0175264 | 88. 78052856 |
|         | 230. 07536   | 127. 9674477 | 56. 48122719 | 70. 06950907 | 758. 3736527 |
|         | 1048. 389642 | 1138. 959696 | 109. 1297143 | 36. 07946691 | 74. 93090365 |
|         | 109. 0856459 | 12. 1948795  | 77. 23080779 | 335. 8228197 | 374. 2790764 |
|         | 432. 931894  | 183. 3709267 |              |              |              |
| PSG2    | 1541. 92252  | 1234. 841312 | 423. 0944463 | 157. 1462452 | 109. 5312437 |
|         | 214. 8615441 | 99. 13536849 | 80. 92660206 | 294. 2433074 | 352. 7444825 |
|         | 148. 4491223 | 136. 1349156 | 170. 0696655 | 156. 9681652 | 95. 30143834 |
|         | 126. 992246  | 116. 270557  | 146. 2605667 | 80. 50482289 | 42. 86988631 |
|         | 61. 87660914 | 553. 4992818 |              |              |              |
| PTGDR   | 84. 74897834 | 75. 93103964 | 34. 61104034 | 549. 7297474 | 59. 43850829 |
|         | 135. 8294143 | 56. 51547019 | 38. 93185048 | 36. 94548042 | 407. 8586616 |
|         | 1627. 918557 | 2044. 535858 | 36. 25887091 | 25. 25504861 | 40. 98318506 |
|         | 26. 78347553 | 32. 57760806 | 29. 80079173 | 21. 23770371 | 29. 11895968 |
|         | 137. 7868425 | 79. 20265559 |              |              |              |
| PTGER2  | 47. 37880726 | 20. 49640288 | 21. 50099156 | 2260. 804067 | 258. 841965  |
|         | 4236. 414392 | 1056. 864994 | 14. 85589132 | 2608. 201318 | 2957. 932915 |
|         | 2983. 001501 | 5770. 127086 | 1154. 310555 | 619. 1628375 | 170. 3953887 |
|         | 1754. 337137 | 584. 1241872 | 826. 8557439 | 460. 4294121 | 892. 0718245 |
|         | 501. 0228289 | 183. 6977894 |              |              |              |
| PTGIR   | 32. 06615205 | 21. 65542661 | 30. 36307028 | 46. 51032228 | 233. 2462403 |
|         | 59. 60491785 | 161. 002021  | 24. 85041048 | 1296. 620335 | 31. 97751482 |
|         | 31. 06375629 | 30. 86641388 | 482. 8617503 | 37. 79124289 | 1832. 0701   |
|         | 1096. 655917 | 27. 40247852 | 1333. 258674 | 196. 2521481 | 113. 9045242 |
|         | 26. 61063961 | 47. 10622736 |              |              |              |
| PTPRCAP | 4113. 169696 | 4036. 430692 | 905. 8167534 | 4378. 93295  | 1887. 920817 |
|         | 4607. 979618 | 1493. 347557 | 5576. 724303 | 3413. 915859 | 1703. 230685 |
|         | 3602. 345527 | 3305. 985414 | 35. 76573661 | 26. 30209546 | 18. 44492663 |
|         | 30. 51218687 | 29. 6087852  | 51. 69649463 | 42. 2402032  | 16. 45954984 |
|         | 351. 6052781 | 40. 98388057 |              |              |              |
| PTPRG   | 106. 5825021 | 96. 88881184 | 84. 32615296 | 3. 798829584 | 4. 273621867 |
|         | 3. 949271467 | 12. 60267124 | 12. 98839722 | 154. 7918901 | 67. 01744049 |
|         | 8. 39063172  | 5. 598819437 | 6. 373268195 | 9. 600273699 | 31. 75264764 |
|         | 4. 706761986 | 8. 931399029 | 18. 24345684 | 9. 872674744 | 2. 978201507 |

|         |              |              |              |              |              |
|---------|--------------|--------------|--------------|--------------|--------------|
|         | 2. 992900342 | 109. 6278029 |              |              |              |
| PVRIG   | 874. 708657  | 1156. 813644 | 303. 2499758 | 3978. 913368 | 2515. 245009 |
|         | 1786. 799569 | 818. 4743673 | 3927. 763769 | 2477. 585452 | 4095. 753219 |
|         | 4533. 058778 | 4025. 406714 | 99. 88281165 | 68. 65638518 | 20. 76445065 |
|         | 113. 3694758 | 57. 36224685 | 96. 69210326 | 87. 81532271 | 17. 22725976 |
|         | 164. 3468784 | 357. 6545327 |              |              |              |
| QPCT    | 15. 58990295 | 25. 78610834 | 2273. 276543 | 24. 03521349 | 3. 411622987 |
|         | 22. 22269743 | 65. 08699055 | 2. 011800929 | 12. 20302577 | 22. 4979037  |
|         | 69. 39293926 | 48. 52460385 | 1499. 926054 | 2646. 756425 | 113. 8352122 |
|         | 1278. 360026 | 1578. 799624 | 420. 5800847 | 235. 9062116 | 247. 8655529 |
|         | 38. 67780446 | 3236. 166445 |              |              |              |
| RAB27B  | 7. 831610308 | 10. 49747881 | 11. 65755142 | 25. 25617138 | 23. 27195892 |
|         | 35. 43354856 | 10. 79075018 | 22. 51380495 | 68. 21956759 | 40. 13993426 |
|         | 91. 19546276 | 82. 18072015 | 6. 931516995 | 6. 062575043 | 13. 50066477 |
|         | 31. 34081799 | 13. 5363234  | 29. 73319865 | 907. 9390023 | 649. 7572478 |
|         | 28. 80815534 | 8. 590150366 |              |              |              |
| RALGPS2 | 1597. 105013 | 1305. 477004 | 112. 819143  | 57. 02675161 | 40. 25707294 |
|         | 23. 42229647 | 36. 80214677 | 28. 21199417 | 98. 90129916 | 85. 48154309 |
|         | 54. 56356691 | 32. 54129812 | 44. 85995177 | 27. 2457713  | 22. 03161941 |
|         | 63. 44359344 | 37. 70351551 | 39. 5414463  | 44. 08881457 | 47. 56182701 |
|         | 56. 92763722 | 109. 4299419 |              |              |              |
| RASA3   | 10. 56154776 | 24. 23500243 | 13. 14017301 | 270. 9813064 | 156. 4816454 |
|         | 327. 8466714 | 24. 57422621 | 71. 22892237 | 79. 60826141 | 68. 96792103 |
|         | 212. 7904928 | 65. 33110512 | 93. 34350756 | 21. 36443032 | 14. 43114488 |
|         | 115. 9404818 | 17. 29897036 | 12. 32264713 | 15. 37212197 | 19. 09834122 |
|         | 26. 66449652 | 19. 42649153 |              |              |              |
| RASGRP2 | 5911. 213148 | 5135. 507838 | 68. 81156687 | 2427. 952654 | 4016. 523813 |
|         | 2855. 39049  | 121. 3399664 | 169. 5987981 | 1173. 438292 | 997. 1942031 |
|         | 1363. 762146 | 256. 5379971 | 759. 9791832 | 41. 20902217 | 120. 6402118 |
|         | 102. 0421756 | 65. 88033568 | 130. 5735306 | 281. 323554  | 209. 5925636 |
|         | 1547. 788877 | 1260. 173261 |              |              |              |
| RASGRP3 | 458. 3600431 | 575. 4533742 | 3254. 10232  | 16. 2266408  | 28. 79489939 |
|         | 13. 66874699 | 13. 74179096 | 15. 84342427 | 93. 14886581 | 16. 02504949 |
|         | 15. 51147933 | 19. 07768435 | 11. 43917669 | 735. 0103013 | 552. 0344178 |
|         | 1320. 702754 | 986. 0715173 | 1037. 512659 | 57. 22500728 | 90. 18575257 |
|         | 77. 00158662 | 15. 89265608 |              |              |              |
| RASSF4  | 22. 67712362 | 18. 66101906 | 15. 11794931 | 22. 98193781 | 29. 25535072 |
|         | 19. 66949919 | 23. 48774462 | 25. 7630517  | 67. 82146858 | 20. 64721465 |
|         | 228. 5281547 | 146. 1955683 | 672. 1035142 | 591. 6261482 | 3036. 440707 |
|         | 560. 785394  | 657. 8411955 | 2481. 685967 | 39. 53020938 | 30. 91340781 |
|         | 15. 57730018 | 33. 77387846 |              |              |              |
| RCAN3   | 46. 66611859 | 40. 66450557 | 41. 29948278 | 155. 029818  | 219. 6437293 |
|         | 566. 9862725 | 193. 0935915 | 28. 81247015 | 332. 6704532 | 28. 35364012 |
|         | 7. 23560514  | 25. 01169532 | 41. 68337282 | 54. 98818208 | 37. 60063067 |
|         | 28. 67150516 | 30. 55512091 | 106. 6270408 | 6. 230147517 | 35. 07280711 |
|         | 10. 99141575 | 5. 269930927 |              |              |              |
| REN     | 63. 75570668 | 51. 28033369 | 391. 9641115 | 30. 74953796 | 76. 81339366 |

|             |             |             |             |             |
|-------------|-------------|-------------|-------------|-------------|
| 42.47010982 | 37.29867542 | 35.79486574 | 74.05101213 | 25.63374355 |
| 26.14898837 | 26.42631865 | 31.44891199 | 30.59695762 | 29.94374704 |
| 26.03111393 | 25.36954972 | 25.18446444 | 87.85793968 | 51.61065942 |
| 33.52436889 | 43.29342529 |             |             |             |
| RENB        | 53.60553688 | 41.69053434 | 23.15489547 | 45.59103269 |
|             | 37.11302941 |             |             |             |
| 34.34525827 | 40.61494394 | 18.33363903 | 33.37503878 | 37.66459052 |
| 20.43861955 | 34.34525827 | 215.0882638 | 433.0934113 | 777.7696598 |
| 1584.310866 | 205.9372141 | 113.6596094 | 101.6442499 | 192.9259608 |
| 306.3902752 | 77.08759041 |             |             |             |
| REPS2       | 40.36292074 | 27.95271373 | 23.92087663 | 13.88756297 |
|             | 12.08950821 |             |             |             |
| 18.95216894 | 8.288872254 | 18.57128353 | 22.28002508 | 19.43901612 |
| 16.00616409 | 21.71773363 | 153.2877211 | 14.49580783 | 9.789026033 |
| 171.2308983 | 46.40358284 | 43.11555986 | 108.2496101 | 19.0519557  |
| 735.5721017 | 1345.638366 |             |             |             |
| RGS1        | 180.1991847 | 246.271589  | 742.0017818 | 646.7216655 |
|             | 215.6731441 |             |             |             |
| 1496.611591 | 1321.498692 | 1981.049393 | 1384.645326 | 110.3073506 |
| 147.0419785 | 255.510178  | 64.44174947 | 147.1485549 | 184.9939733 |
| 63.8234625  | 62.10361148 | 3515.825678 | 507.2404796 | 474.484624  |
| 6082.807012 | 111.3503483 |             |             |             |
| RGS13       | 71.26574474 | 70.49121711 | 269.9126854 | 26.92097022 |
|             | 11.20330491 |             |             |             |
| 22.22269743 | 7.843078446 | 7.972776848 | 27.72115697 | 60.00992468 |
| 36.27118978 | 29.94374704 | 18.73599553 | 9.041316875 | 5.136655175 |
| 3.828607749 | 4.083493393 | 34.67367816 | 2908.942653 | 3857.995451 |
| 1591.017083 | 19.83442204 |             |             |             |
| RNASE2      | 186.4718703 | 164.907335  | 350.7677573 | 216.8731189 |
|             | 156.1334939 |             |             |             |
| 98.76355416 | 102.5188931 | 83.75974388 | 107.0530669 | 600.512299  |
| 663.0545505 | 230.07536   | 3614.28076  | 144.2292522 | 407.2225704 |
| 677.7138981 | 143.2632325 | 145.7209604 | 1975.141115 | 2222.694963 |
| 6527.495415 | 672.1905923 |             |             |             |
| RNASE6      | 1799.683549 | 1157.232625 | 2281.114952 | 17.05134667 |
|             | 28.13135229 |             |             |             |
| 64.4438491  | 8.863552717 | 22.17275389 | 11.37316837 | 777.2554078 |
| 84.58792101 | 14.36766267 | 4038.448716 | 2527.65046  | 306.1693936 |
| 5075.103934 | 8418.335804 | 853.6151668 | 681.3654348 | 506.4674568 |
| 144.0092188 | 2002.128163 |             |             |             |
| RPL10L      | 36.038732   | 70.34302342 | 311.314882  | 321.3503467 |
|             | 328.0740952 |             |             |             |
| 588.7015627 | 346.9414841 | 160.244989  | 144.4448434 | 184.4753417 |
| 91.27669248 | 98.92836489 | 95.70491339 | 57.31550918 | 53.34937988 |
| 70.33336588 | 26.98167014 | 75.52316136 | 182.7339103 | 140.7121505 |
| 24.82149691 | 13.6945175  |             |             |             |
| RPL3P7      | 76.85048537 | 379.4864795 | 1151.460639 | 1290.949662 |
|             | 4477.729529 |             |             |             |
| 3370.859953 | 1067.780098 | 2289.139001 | 1429.669295 | 649.1975723 |
| 256.6761145 | 55.10360905 | 109.4607889 | 25.67577369 | 39.64729475 |
| 31.93512985 | 20.79837075 | 74.47742389 | 459.1784166 | 252.4467177 |
| 266.1820622 | 142.5383492 |             |             |             |
| RRP12       | 12.81515335 | 12.57253314 | 546.1354514 | 10.83222373 |
|             | 10.26293695 |             |             |             |
| 14.31729413 | 378.7293568 | 17.27184239 | 28.96853799 | 9.389333103 |
| 20.59701131 | 75.44491958 | 288.3451691 | 98.84973377 | 11.72814867 |

|         |              |                         |              |                         |              |
|---------|--------------|-------------------------|--------------|-------------------------|--------------|
|         | 14. 51466222 | 35. 49710568            | 11. 84870047 | 26. 91471649            | 173. 3527607 |
|         | 930. 2305857 | 274. 0937737            |              |                         |              |
| RRP9    | 9. 544532505 | 16. 3321486             | 17. 54854083 | 92. 36151715            | 116. 4244851 |
|         | 49. 53085908 | 524. 2815539            | 82. 56301801 | 21. 61705767            | 72. 63989178 |
|         | 53. 29234769 | 186. 6021403            | 36. 13230183 | 164. 9509697            | 183. 1808863 |
|         | 91. 16319084 | 29. 29745433            | 16. 43308988 | 110. 6197466            | 173. 3669546 |
|         | 45. 90579476 | 9. 945088387            |              |                         |              |
| RSAD2   | 215. 2283477 | 211. 2148732            | 215. 5173489 | 164. 1021811            | 230. 6806713 |
|         | 222. 8577454 | 149. 4255108            | 101. 6083258 | 852. 5910812            | 390. 7076696 |
|         | 300. 3481477 | 666. 8036659            | 334. 986335  | 78. 8723585             | 6976. 481671 |
|         | 140. 1673526 | 115. 74094 7545. 527873 | 399. 4351209 | 312. 6203522            |              |
|         | 1070. 378854 | 713. 3593658            |              |                         |              |
| RYR1    | 108. 5578105 | 115. 9141217            | 61. 53204161 | 134. 6786684            | 13. 31038127 |
|         | 134. 9186388 | 161. 9808797            | 214. 1715785 | 1289. 511214            | 142. 5812776 |
|         | 38. 11141231 | 76. 73435744            | 128. 5919034 | 205. 7970663            | 72. 99488239 |
|         | 102. 3003102 | 117. 1694825            | 105. 5402507 | 15. 79705542            | 55. 48825404 |
|         | 75. 75195307 | 199. 9238732            |              |                         |              |
| S100A12 | 190. 663133  | 205. 6096122            | 206. 614297  | 103. 0892269            | 122. 0464109 |
|         | 78. 96882194 | 77. 60907212            | 114. 3269206 | 93. 856191 2375. 556565 |              |
|         | 1088. 208915 | 220. 6263312            | 11149. 65069 | 143. 0161359            | 258. 3004281 |
|         | 123. 701236  | 132. 8315959            | 138. 8702312 | 1054. 174516            | 976. 5083429 |
|         | 374. 4516108 | 8781. 768452            |              |                         |              |
| S1PR5   | 7. 997120003 | 7. 027494673            | 7. 65617701  | 41. 04900098            | 8. 45170015  |
|         | 6. 547727883 | 6. 843334165            | 8. 886630463 | 5. 615635204            | 13. 06706142 |
|         | 587. 6581174 | 175. 6975199            | 6. 788452669 | 9. 800628668            | 6. 633637977 |
|         | 6. 433693872 | 6. 920113656            | 7. 668039292 | 8. 974214161            | 9. 124929522 |
|         | 8. 09184729  | 9. 352910216            |              |                         |              |
| SAMSN1  | 197. 0884279 | 441. 9005895            | 574. 9216874 | 794. 816235             | 609. 2761383 |
|         | 1660. 128114 | 2859. 409338            | 577. 4007393 | 1973. 849465            | 1571. 696585 |
|         | 1266. 566015 | 2876. 602126            | 1412. 29406  | 645. 6886884            | 5090. 528151 |
|         | 3133. 89778  | 2070. 552906            | 7507. 176097 | 6327. 078194            | 4360. 895256 |
|         | 11409. 47833 | 1654. 100485            |              |                         |              |
| SCN9A   | 7. 11928632  | 7. 905938062            | 8. 439383107 | 5. 599396915            | 20. 4393522  |
|         | 6. 409332909 | 6. 276977095            | 22. 14183418 | 39. 74988474            | 56. 53456409 |
|         | 11. 24582219 | 10. 59412632            | 6. 128985193 | 6. 720861612            | 111. 6046467 |
|         | 88. 10035668 | 304. 8088511            | 6. 084883035 | 61. 22511339            | 108. 6710445 |
|         | 17. 76010304 | 15. 23819177            |              |                         |              |
| SEC31B  | 64. 80136266 | 51. 08175979            | 101. 2389769 | 423. 4721951            | 539. 2656032 |
|         | 63. 79022174 | 23. 57209837            | 163. 9010445 | 1073. 503244            | 58. 50379417 |
|         | 248. 3195373 | 30. 97425375            | 136. 5478618 | 33. 18258928            | 58. 5085105  |
|         | 492. 0692023 | 38. 33774434            | 29. 75143595 | 207. 472637             | 231. 1663064 |
|         | 179. 5015829 | 40. 56722012            |              |                         |              |
| SELL    | 11102. 0298  | 8002. 61479             | 376. 9049927 | 7418. 862396            | 9805. 46284  |
|         | 7104. 510327 | 2531. 49842             | 4188. 175594 | 5165. 445456            | 10585. 56882 |
|         | 5741. 494585 | 1590. 659482            | 7242. 740165 | 103. 9204555            | 234. 1716363 |
|         | 287. 2191393 | 121. 953751             | 137. 3301011 | 353. 9899758            | 288. 7165574 |
|         | 3001. 389383 | 13724. 93946            |              |                         |              |



|         |             |             |             |             |             |
|---------|-------------|-------------|-------------|-------------|-------------|
| SEPT5   | 10.89927471 | 18.06590222 | 52.73721382 | 13.1121548  | 56.7692406  |
|         | 37.98662268 | 43.47348792 | 15.39081454 | 256.754317  | 93.46696057 |
|         | 19.49414625 | 22.41199796 | 16.50408571 | 14.40167057 | 27.46127525 |
|         | 14.79336806 | 14.32019206 | 25.86887464 | 23.98393978 | 23.25211628 |
|         | 35.94016466 | 25.73609401 |             |             |             |
| SEPT8   | 27.7175438  | 22.87983558 | 37.65356333 | 31.02782537 | 35.00087493 |
|         | 35.93880485 | 272.6170427 | 126.6447075 | 33.16765019 | 30.19637375 |
|         | 26.97577912 | 67.28417387 | 15.62108755 | 27.18926965 | 183.0663448 |
|         | 72.01025469 | 34.66782519 | 19.83223519 | 417.7817187 | 267.4681455 |
|         | 24.51115472 | 21.77777366 |             |             |             |
| SERGEF  | 15.69138202 | 11.98596801 | 11.09025115 | 63.60787074 | 264.2358173 |
|         | 28.58789254 | 16.22879037 | 189.1431751 | 15.82118936 | 17.27020744 |
|         | 64.18194259 | 41.5765162  | 20.42165917 | 24.06055832 | 113.6054513 |
|         | 103.0111836 | 16.8397593  | 19.0610534  | 88.98322459 | 39.40617951 |
|         | 19.49842933 | 16.74391215 |             |             |             |
| SH2D1A  | 30.86641388 | 23.74579306 | 17.02062149 | 1249.210018 | 910.0374967 |
|         | 1354.892078 | 1484.478664 | 2984.358981 | 2057.444392 | 1522.337958 |
|         | 1296.002366 | 844.7081417 | 18.41801556 | 17.33796088 | 17.53465103 |
|         | 11.39071505 | 16.51251838 | 27.6285163  | 22.17158328 | 43.95158903 |
|         | 29.31150533 | 41.8750989  |             |             |             |
| SIGLEC1 | 258.3004281 | 149.3986543 | 98.52007343 | 81.50052589 | 55.54431252 |
|         | 91.07262834 | 46.5723539  | 55.13574502 | 132.2882244 | 181.1221996 |
|         | 98.8058291  | 88.81589691 | 279.3221994 | 116.4299735 | 6220.794765 |
|         | 3457.591061 | 447.6079282 | 2742.909524 | 185.6630518 | 145.6660089 |
|         | 126.3742217 | 245.9321054 |             |             |             |
| SIK1    | 5471.704926 | 5620.453994 | 7279.249666 | 1219.200313 | 494.4265452 |
|         | 410.006561  | 162.0409056 | 4922.268476 | 942.2614617 | 393.1870068 |
|         | 457.6523281 | 248.2954165 | 544.8091055 | 146.1531348 | 292.9918215 |
|         | 111.2439257 | 104.8119808 | 228.1768122 | 59.70681574 | 326.9960366 |
|         | 2371.944991 | 401.5465651 |             |             |             |
| SIRPG   | 74.41451203 | 127.7355428 | 55.74523407 | 1310.139566 | 1078.535981 |
|         | 1148.814515 | 293.2102273 | 3092.334477 | 2278.399895 | 713.8212187 |
|         | 98.34637628 | 57.88335321 | 54.8626275  | 31.73696814 | 80.84943542 |
|         | 39.50876033 | 30.07003805 | 83.9411784  | 13.59528084 | 25.50236675 |
|         | 81.76982471 | 125.1446974 |             |             |             |
| SIT1    | 759.1593175 | 1505.448039 | 424.4791722 | 1457.873439 | 1418.51616  |
|         | 1612.60149  | 927.3906158 | 1676.239317 | 4164.941026 | 1324.14278  |
|         | 115.1265171 | 107.7569918 | 99.63796028 | 121.9743848 | 60.40293882 |
|         | 107.7569918 | 411.7305737 | 77.55169941 | 76.7881106  | 51.40969236 |
|         | 76.98880064 | 286.5258188 |             |             |             |
| SKA1    | 4.914356682 | 2.770472888 | 3.236183763 | 2.220631652 | 15.89364427 |
|         | 1.658857567 | 353.1886192 | 53.82754533 | 32.1969624  | 20.96016433 |
|         | 17.19149842 | 41.3563524  | 3.198489691 | 4.375489179 | 6.57228761  |
|         | 15.6035437  | 2.81889331  | 4.751056832 | 30.76766673 | 18.08123801 |
|         | 5.435240974 | 2.093797389 |             |             |             |
| SKAP1   | 1378.742233 | 556.9267569 | 875.1463025 | 2273.257742 | 2670.874802 |
|         | 2395.678989 | 814.2486746 | 2389.171966 | 5831.851105 | 2886.347943 |

|             |             |             |             |             |
|-------------|-------------|-------------|-------------|-------------|
| 2037.376281 | 1513.442454 | 155.1060459 | 188.0291943 | 115.4350344 |
| 100.357131  | 168.3391756 | 153.5290423 | 498.3461422 | 480.9894709 |
| 445.0168928 | 388.8474803 |             |             |             |
| SLAMF1      | 762.0351121 | 515.4872027 | 1019.767442 | 496.4217166 |
|             |             |             |             | 449.8358705 |
| 1081.526073 | 2005.427058 | 1074.944299 | 1504.845258 | 720.6522405 |
| 114.1243297 | 115.6197705 | 111.9089299 | 131.7093126 | 6057.915205 |
| 845.5065088 | 126.4411906 | 801.5218011 | 58.05601406 | 157.5576331 |
| 243.9828796 | 260.858135  |             |             |             |
| SLAMF8      | 156.6501475 | 135.5923959 | 79.43023238 | 107.6408152 |
|             |             |             |             | 72.69074036 |
| 101.4058634 | 85.97854784 | 48.49238871 | 37.4347836  | 218.2134567 |
| 170.4258874 | 95.17401569 | 166.4059352 | 2483.002598 | 663.4733228 |
| 1407.517431 | 2859.321256 | 358.4664294 | 237.642389  | 389.3018874 |
| 111.1519762 | 120.6524521 |             |             |             |
| SLC12A1     | 89.4899425  | 48.93661716 | 9.107287855 | 10.77936011 |
|             |             |             |             | 13.59723596 |
| 11.20330491 | 1.863695454 | 1.863695454 | 20.23145003 | 37.92005759 |
| 3.639923264 | 3.866557468 | 3.335133412 | 3.699265138 | 5.19508538  |
| 1.712065726 | 2.708807426 | 1.786805461 | 5.250153157 | 18.19115834 |
| 24.7590821  | 8.293088602 |             |             |             |
| SLC12A8     | 7.225818568 | 8.434874182 | 52.06339581 | 14.91996119 |
|             |             |             |             | 11.19206299 |
| 3.740216058 | 9.306658239 | 34.82375423 | 48.42252291 | 7.503468941 |
| 10.14791696 | 18.06584929 | 11.98809147 | 466.0589582 | 24.5564624  |
| 25.3393543  | 37.95714189 | 52.24193196 | 447.9225018 | 581.4055879 |
| 107.0092016 | 13.16312363 |             |             |             |
| SLC15A3     | 9.050871942 | 202.4492561 | 10.26293695 | 18.5710453  |
|             |             |             |             | 27.12597858 |
| 19.36453188 | 13.09271261 | 18.79636185 | 9.872890222 | 74.5094252  |
| 11.74522644 | 8.498902895 | 1682.54452  | 4564.069594 | 3860.541888 |
| 5890.338133 | 3688.669477 | 4650.121848 | 321.2954407 | 438.8157376 |
| 20.39019926 | 1431.042545 |             |             |             |
| SLC2A6      | 112.56368   | 313.2302692 | 42.90224117 | 43.07557759 |
|             |             |             |             | 8.055918939 |
| 15.58990295 | 24.88582    | 11.07886417 | 17.54138316 | 213.1524507 |
| 70.73672817 | 125.466199  | 623.8936693 | 328.7462744 | 6057.915205 |
| 579.7336116 | 500.2261802 | 1981.204438 | 552.6577118 | 528.6359134 |
| 14.41361211 | 12.17469756 |             |             |             |
| SLC7A10     | 66.78073716 | 84.61698111 | 110.6318514 | 33.20097043 |
|             |             |             |             | 19.66949919 |
| 53.12123129 | 44.81896685 | 626.6515191 | 23.56884003 | 14.77666766 |
| 31.85028897 | 24.36857837 | 34.30894984 | 52.92098872 | 34.7291372  |
| 26.32189818 | 37.79824063 | 53.05335639 | 47.67700578 | 11.7742041  |
| 34.6614461  | 50.97452513 |             |             |             |
| SLC05A1     | 118.7296898 | 108.1291054 | 82.29386042 | 30.06870751 |
|             |             |             |             | 55.91267865 |
| 70.96791001 | 41.79365254 | 15.57807487 | 112.9325737 | 35.53050559 |
| 73.09344194 | 49.59274467 | 40.69340961 | 42.48673066 | 954.0382072 |
| 39.75712842 | 42.93594304 | 1056.080519 | 14.98054654 | 26.31428316 |
| 29.11032035 | 131.4344977 |             |             |             |
| SMPD3       | 70.72102235 | 140.540597  | 328.7366695 | 70.12682543 |
|             |             |             |             | 148.9719357 |
| 47.62155017 | 17.258479   | 516.1544785 | 27.3493063  | 99.22270606 |
| 89.68398839 | 154.573264  | 35.63627466 | 44.17497653 | 66.63623186 |
| 116.4670669 | 23.5940494  | 53.33653667 | 15.1723682  | 30.90533172 |

1685.7279 246.5509419  
 SMPDL3B 2.724372492 3.034400379 6.771782908 3.73037929 5.877194227  
 3.847184414 4.624418991 4.914356682 6.387050179 9.073790284  
 4.588512766 4.182493252 4.661740608 4.125782205 4.751056832  
 4.031081011 3.678959719 4.248305374 4.795918331 5.282496017  
 155.7849254 6.39158455  
 SOCS1 27.14793524 25.09172222 16.85549775 160.8027185 64.4438491  
 117.8166952 1034.179076 255.1479692 604.6602261 80.88085602  
 49.70265419 1230.201795 20.71591309 82.36571476 2300.259226  
 705.1354113 103.7199643 398.8444411 50.34356835 59.60816677  
 52.27131121 31.69383195  
 SP140 881.125548 2397.760361 1001.792706 422.1251624 367.6750359  
 549.3361922 376.9049927 529.7231104 659.0216126 475.9591297  
 411.7724421 385.2475659 107.9949811 76.35053504 170.8986502  
 30.82412721 75.79589461 212.573622 54.88954044 26.60936953  
 654.2750566 218.1702966  
 SPAG4 16.39614273 24.95714972 3657.844908 60.34817877 79.5891519  
 64.66029759 120.1755798 87.31662416 50.08813703 83.87858963  
 8.399871249 50.78803941 16.94563165 34.0400967 21.82778451  
 11.61080204 11.74593292 50.70004672 41.63965234 106.8030875  
 52.47902692 22.84191822  
 SPIB 3945.300733 5363.4372 128.9672433 67.02484651 111.2439257  
 74.71026363 74.10530922 88.49719564 12.73818081 98.69157038  
 106.9259138 78.25416453 116.3915428 57.81514413 1435.057428  
 31.21088513 57.53286072 40.31588104 75.17714713 73.12638767  
 83.38153908 272.8204886  
 SPOCK2 1531.023729 1120.73105 433.012581 3283.92381 2040.442671  
 3212.756292 1022.450995 3128.50636 4263.9774 1757.141517  
 995.6524365 650.4634003 263.011432 175.9842183 132.2193618  
 118.3071595 202.7159891 217.0461442 211.7278211 172.4173117  
 437.5889734 594.0103963  
 SSX1 1.658857567 3.900272217 3.286119074 7.384988622 40.80982734  
 2.493139629 9.812231302 25.44533792 117.0747287 58.08304612  
 2.161370142 1.479085222 5.167103334 9.739377312 7.46633806  
 23.76513175 14.99089205 26.61872738 26.03413905 18.90635556  
 43.12335361 14.77955057  
 ST3GAL6 66.60162565 34.3893867 66.14136755 7.158395479 12.96669349  
 6.482478073 6.982740503 20.88194891 20.23462109 45.97919713  
 27.10829 18.38880596 357.9772296 524.564052 41.07506248  
 192.2179775 398.9464519 1251.448838 742.8329889 710.1274498  
 1574.930342 466.5209967  
 ST6GALNAC4 264.3270269 441.0048109 2093.524176 408.1100167  
 297.0293513 398.8717851 276.2455792 263.2789632 799.8515516  
 351.5954793 240.2635016 227.0422204 195.8463286 688.7351586  
 133.9832531 243.2991012 349.1318417 182.6270057 113.4914762  
 129.7475492 134.8323638 181.6890388  
 ST8SIA1 50.56172691 44.96471016 9.741848192 75.93922657 9.129359328

|          |             |             |             |             |             |
|----------|-------------|-------------|-------------|-------------|-------------|
|          | 278.4319646 | 97.33937156 | 2924.590009 | 32.76973467 | 78.19146733 |
|          | 6.718345522 | 14.10673265 | 8.218778885 | 5.382915835 | 13.60956204 |
|          | 3.807870165 | 6.257607885 | 14.96016422 | 313.2838676 | 62.58965914 |
|          | 5.018635304 | 15.88264599 |             |             |             |
| STAP1    | 3534.504408 | 1961.960801 | 983.2371048 | 112.0597302 | 432.5194514 |
|          | 110.856908  | 108.0607513 | 92.39233333 | 615.5083627 | 68.95913217 |
|          | 299.8706305 | 435.480525  | 21.15804952 | 25.9443561  | 372.9209445 |
|          | 43.53483002 | 47.63471034 | 120.7564143 | 3297.989161 | 2140.766305 |
|          | 831.8707238 | 48.56097434 |             |             |             |
| STEAP4   | 4.42067119  | 8.353897982 | 7.819769102 | 4.832288844 | 10.49185361 |
|          | 2.346954138 | 3.411622987 | 3.594013    | 71.18929282 | 7.879999289 |
|          | 8.756230575 | 17.27184239 | 111.873397  | 5.310285765 | 22.35085197 |
|          | 26.46384319 | 48.28814175 | 4.304290172 | 33.18345138 | 43.22283208 |
|          | 25.0235825  | 800.5703388 |             |             |             |
| STXBP6   | 16.73521702 | 15.04379369 | 32.06615205 | 16.13910899 | 18.76887513 |
|          | 21.45135324 | 14.46846851 | 17.85021806 | 8.586358526 | 14.44502275 |
|          | 10.56909    | 11.99719249 | 12.89610083 | 12.90257104 | 24.24874392 |
|          | 13.12815713 | 12.40900014 | 14.61020736 | 315.8071292 | 239.9762281 |
|          | 16.29439284 | 14.80593608 |             |             |             |
| TARDBPP1 | 42.03948876 | 48.24713311 | 11.19206299 | 20.13104889 | 56.90002211 |
|          | 38.53463959 | 63.68405364 | 29.13250856 | 4.882051391 | 104.0260167 |
|          | 13.59143299 | 31.08142239 | 9.112054424 | 40.62396736 | 4.672469314 |
|          | 6.606824787 | 30.78464147 | 22.03505447 | 18.59746591 | 23.04525243 |
|          | 47.62167267 | 62.01117545 |             |             |             |
| TBX21    | 504.1990666 | 543.923946  | 450.3185771 | 1658.322072 | 162.9916872 |
|          | 522.1073862 | 1173.96483  | 445.5205989 | 334.0503226 | 1805.133857 |
|          | 4208.888552 | 3311.978393 | 273.2767975 | 315.8607585 | 526.5774707 |
|          | 86.6079297  | 245.4943449 | 178.261254  | 141.1042313 | 151.2597324 |
|          | 242.2058318 | 542.1588248 |             |             |             |
| TCF7     | 32.1556293  | 157.1737661 | 24.80221189 | 3170.404097 | 5181.114553 |
|          | 3207.171426 | 351.3659373 | 4668.361682 | 754.808733  | 910.6990599 |
|          | 415.1493446 | 151.5623553 | 18.65570294 | 24.98661146 | 284.0317902 |
|          | 43.91152808 | 32.56860072 | 55.65274077 | 22.35563875 | 21.57656523 |
|          | 451.3650271 | 55.11585006 |             |             |             |
| TCL1A    | 12117.94539 | 763.1449829 | 493.5179123 | 106.739179  | 133.6927662 |
|          | 105.523008  | 62.11998297 | 138.6741034 | 108.7230911 | 106.6455477 |
|          | 104.9994128 | 78.2920509  | 161.4604075 | 108.830925  | 109.218595  |
|          | 72.95993424 | 90.24888922 | 122.3968151 | 50.03226763 | 93.0399196  |
|          | 259.7561099 | 261.7385971 |             |             |             |
| TEC      | 11.26237461 | 11.13599083 | 9.61033962  | 11.99089142 | 8.992612544 |
|          | 9.646923918 | 9.195676707 | 12.7431858  | 8.92091341  | 14.80669355 |
|          | 20.22252914 | 16.45891984 | 16.29861436 | 19.98621302 | 66.07482414 |
|          | 50.36671815 | 14.62208914 | 21.16569802 | 23.41596618 | 225.4910315 |
|          | 80.57831321 | 12.87726499 |             |             |             |
| TEP1     | 13.00060521 | 15.87747831 | 6.805956619 | 98.35605225 | 13.17735831 |
|          | 95.04661844 | 15.47869427 | 8.393614631 | 9.251815429 | 9.550904671 |
|          | 181.4004368 | 91.56873261 | 16.10571842 | 8.991936007 | 69.86793771 |

|           |             |             |             |             |             |
|-----------|-------------|-------------|-------------|-------------|-------------|
|           | 112.1957614 | 48.0734321  | 12.2359858  | 13.60384434 | 5.707248958 |
|           | 8.370970376 | 11.99606546 |             |             |             |
| TGM5      | 60.12655552 | 71.99773897 | 785.5941764 | 47.8969765  | 41.46606342 |
|           | 47.09380347 | 40.98318506 | 33.23725547 | 71.18774803 | 82.63306347 |
|           | 56.85336746 | 60.67685001 | 64.53380501 | 55.85317965 | 69.97949464 |
|           | 126.5453946 | 58.75579949 | 77.88602952 | 118.4957283 | 160.108741  |
|           | 152.1582745 | 82.75554452 |             |             |             |
| TLR2      | 81.54272739 | 113.709418  | 115.9850691 | 120.5282543 | 135.7286165 |
|           | 126.8421582 | 102.0859478 | 151.8480214 | 81.98559599 | 438.5864476 |
|           | 138.3345347 | 140.2158809 | 4560.185304 | 793.699493  | 4668.361682 |
|           | 3071.447657 | 1202.759716 | 487.1255361 | 680.7876421 | 1591.232654 |
|           | 118.7000496 | 5374.798483 |             |             |             |
| TLR7      | 49.81426014 | 102.4990755 | 37.62419139 | 7.997221294 | 58.36525286 |
|           | 9.70690203  | 7.262313101 | 36.29565926 | 49.5799296  | 84.85721753 |
|           | 31.8438018  | 10.83895443 | 570.6516022 | 34.35052469 | 966.7052764 |
|           | 546.9250913 | 35.19591687 | 60.11520175 | 33.4472936  | 22.98087009 |
|           | 158.4344162 | 20.0870008  |             |             |             |
| TLR8      | 7.582193721 | 6.714925465 | 19.45168576 | 5.70074897  | 5.570829264 |
|           | 6.830950912 | 5.730458788 | 39.48271435 | 5.723066082 | 91.59801705 |
|           | 5.825720142 | 6.107123818 | 1522.070253 | 646.6061428 | 2380.195799 |
|           | 1082.104258 | 553.7198288 | 667.192622  | 19.05833985 | 9.50032415  |
|           | 7.370219005 | 1719.870237 |             |             |             |
| TMEM156   | 574.4981382 | 577.0327019 | 771.380008  | 168.0820865 | 114.8275013 |
|           | 152.9758784 | 334.197775  | 276.9063479 | 221.7312302 | 207.1593629 |
|           | 138.8828404 | 141.9594113 | 23.45170307 | 26.25281018 | 17.46905843 |
|           | 21.15896542 | 30.88767375 | 23.225842   | 23.73534036 | 29.2534512  |
|           | 288.5489965 | 51.44861036 |             |             |             |
| TMEM255A  | 64.48080982 | 43.77493033 | 47.15884594 | 38.72072177 | 5.079112797 |
|           | 22.20688826 | 16.47169916 | 4.573719127 | 52.65374427 | 63.73438687 |
|           | 49.63841616 | 29.92011687 | 66.84987758 | 354.6259629 | 289.1639534 |
|           | 167.0152257 | 926.137278  | 979.6564849 | 43.72927667 | 12.85862889 |
|           | 3.957441844 | 37.11078102 |             |             |             |
| TNFAIP6   | 267.9179363 | 259.8916347 | 141.1803804 | 81.29435266 | 36.71555117 |
|           | 94.24800971 | 79.12333165 | 63.61546587 | 131.8853818 | 147.6840939 |
|           | 123.7740746 | 145.8185128 | 233.4391136 | 347.1638911 | 19190.61594 |
|           | 325.3643379 | 245.9512171 | 8826.486407 | 253.2624558 | 2285.704444 |
|           | 203.2806125 | 3460.952883 |             |             |             |
| TNFRSF10C | 44.84631996 | 28.85121323 | 27.82084    | 27.03922751 | 25.78013421 |
|           | 57.28934706 | 44.90546301 | 21.95552174 | 33.97430589 | 39.13114743 |
|           | 20.06638784 | 37.57632728 | 237.9058901 | 48.17879865 | 42.18070928 |
|           | 75.92997592 | 53.99033577 | 48.90501431 | 79.22645394 | 82.62208068 |
|           | 288.9786687 | 3919.76984  |             |             |             |
| TNFRSF11A | 50.02783296 | 32.36541213 | 28.03580356 | 9.855680429 | 6.818438323 |
|           | 22.07591774 | 45.77175188 | 14.45611207 | 930.5271046 | 87.70315573 |
|           | 86.12792797 | 68.56018671 | 17.83610862 | 37.89907656 | 74.82023836 |
|           | 396.3913895 | 281.4799185 | 708.1258587 | 24.86947846 | 80.59359524 |
|           | 12.25490482 | 67.7636041  |             |             |             |

|           |              |             |             |             |             |
|-----------|--------------|-------------|-------------|-------------|-------------|
| TNFRSF13B | 502.6927279  | 1498.256342 | 1292.53498  | 181.9551888 | 307.6962383 |
|           | 120.0804247  | 138.9893405 | 181.9526719 | 379.5542581 | 372.4166229 |
|           | 227.5044918  | 167.0688665 | 188.0078881 | 158.639318  | 240.986393  |
|           | 171.9065402  | 167.5646975 | 186.0239287 | 163.0912348 | 187.8628997 |
|           | 290.7927064  | 342.7765361 |             |             |             |
| TNFRSF17  | 22.5997525   | 247.609295  | 7744.01596  | 13.81523144 | 4.347662735 |
|           | 13.44126834  | 7.947610014 | 7.855308418 | 41.18335555 | 10.04246187 |
|           | 12.50971798  | 8.910362721 | 10.1098504  | 10.59143865 | 9.409205288 |
|           | 13.52425156  | 10.59179267 | 17.5240948  | 7.227678736 | 6.534182401 |
|           | 20.98966863  | 9.35211403  |             |             |             |
| TNFRSF4   | 15.01956589  | 14.8278152  | 142.8319114 | 18.71047795 | 22.20688826 |
|           | 524.4770391  | 1997.155963 | 1178.444669 | 2852.970487 | 21.35202747 |
|           | 195.89287697 | 7043267     | 17.76981387 | 20.73872674 | 1462.50333  |
|           | 203.4808519  | 1646.191207 | 76.94630793 | 347.3968639 | 25.15229317 |
|           | 28.18616394  |             |             |             |             |
| TNFSF14   | 10.0823446   | 9.719004464 | 9.555358782 | 92.31649554 | 28.21199417 |
|           | 59.18404696  | 428.3545003 | 168.835817  | 258.1350672 | 17.77460958 |
|           | 362.1020637  | 2050.816822 | 35.07227527 | 936.6552461 | 20.45437223 |
|           | 16.04544391  | 17.95365709 | 8.691520443 | 13.49997975 | 66.46487192 |
|           | 291.7775578  | 614.120037  |             |             |             |
| TNIP3     | 14.12983303  | 31.867553   | 12.33024148 | 70.50041584 | 64.72785062 |
|           | 30.8024485   | 446.3091826 | 257.640918  | 48.14764737 | 43.91377403 |
|           | 18.25984636  | 11.86713177 | 14.52350675 | 241.1663751 | 1192.706587 |
|           | 17.36410025  | 23.11775258 | 47.4835514  | 42.84667423 | 106.0845587 |
|           | 41.53015417  | 15.74452103 |             |             |             |
| TPSAB1    | 1102.29779   | 794.7203184 | 151.7313169 | 376.0368021 | 43.36581215 |
|           | 284.8186666  | 147.2741095 | 481.0725006 | 28.78893808 | 262.6432093 |
|           | 465.2204213  | 311.7403372 | 543.6290931 | 358.1005731 | 368.9130231 |
|           | 365.4798555  | 397.8866549 | 396.8599394 | 27467.08759 | 29437.28907 |
|           | 918.5119625  | 1033.132677 |             |             |             |
| TRAC      | 572.5113556  | 1006.350088 | 215.8269579 | 13721.45552 | 14057.43026 |
|           | 15532.16188  | 8731.942274 | 20117.66469 | 19538.4969  | 3189.238319 |
|           | 815.6846136  | 506.0537577 | 208.9784165 | 252.2397003 | 151.3173183 |
|           | 142.6133419  | 215.6237237 | 255.9384554 | 159.567675  | 187.1669874 |
|           | 880.0902068  | 790.0055576 |             |             |             |
| TRAF4     | 194.7986362  | 450.3805458 | 103.831718  | 27.41737791 | 35.38777983 |
|           | 88.21790387  | 248.213136  | 107.5017488 | 48.57230164 | 40.01034813 |
|           | 54.5480586   | 70.6081762  | 28.30245079 | 30.40539832 | 23.05515036 |
|           | 23.70038398  | 39.85889969 | 30.04309979 | 166.0286165 | 185.660216  |
|           | 80.71335948  | 48.24388624 |             |             |             |
| TRAT1     | 13.5847049   | 15.98508028 | 17.40314684 | 816.7413233 | 2327.160635 |
|           | 2578.359018  | 1616.337428 | 1427.702674 | 448.2961522 | 1435.573943 |
|           | 25.38745132  | 41.18448661 | 6.845897848 | 13.33976249 | 6.319098182 |
|           | 4.273621867  | 10.65205619 | 29.29706627 | 33.59153566 | 35.53946833 |
|           | 193.0502207  | 10.38229418 |             |             |             |
| TRAV12-2  | 13.14017301  | 12.20201385 | 9.555358782 | 225.3780296 | 99.38436963 |
|           | 100.6104917  | 12.96669349 | 85.70898291 | 9.535532796 | 11.61297377 |

|          |             |             |             |             |             |
|----------|-------------|-------------|-------------|-------------|-------------|
|          | 11.08896426 | 9.776317635 | 10.63253287 | 10.29206918 | 10.57301826 |
|          | 8.463162241 | 12.87147163 | 11.68801662 | 7.555697662 | 9.149337627 |
|          | 11.60323881 | 15.47264026 |             |             |             |
| TRAV13-1 | 88.73958185 | 72.48117143 | 40.55965894 | 463.1984082 | 537.6097159 |
|          | 881.5627754 | 411.162234  | 707.2496886 | 138.6945511 | 76.99469029 |
|          | 42.45202479 | 28.3148996  | 29.72104173 | 23.48775343 | 37.77736037 |
|          | 12.25757399 | 32.45267986 | 36.23428561 | 66.13800202 | 35.7585025  |
|          | 29.26235006 | 74.99855252 |             |             |             |
| TRAV13-2 | 72.69074036 | 67.18924471 | 68.66194527 | 369.2792078 | 411.162234  |
|          | 639.8040504 | 201.5321093 | 381.3344477 | 191.405895  | 38.54870306 |
|          | 44.35066443 | 55.64727919 | 56.85541485 | 51.02429694 | 35.79486574 |
|          | 39.12138574 | 41.21658712 | 67.13601356 | 25.93332534 | 33.83672753 |
|          | 55.62918464 | 88.04801861 |             |             |             |
| TRAV21   | 119.891114  | 65.25320664 | 125.1327277 | 439.3576224 | 417.5047308 |
|          | 765.2981535 | 157.5889451 | 463.357295  | 2763.362726 | 49.08129044 |
|          | 55.8763643  | 46.6365232  | 51.31601583 | 42.96072752 | 31.46897563 |
|          | 36.23835539 | 52.02734337 | 17.85858588 | 79.46582934 | 72.06010035 |
|          | 196.2354888 | 88.25003141 |             |             |             |
| TRAV8-6  | 24.5564624  | 22.1433316  | 18.81035485 | 244.1129158 | 317.7910043 |
|          | 396.1200681 | 172.8402474 | 439.2288461 | 676.1350103 | 22.66646971 |
|          | 18.30217166 | 15.40291048 | 34.39428346 | 25.30927131 | 19.19569957 |
|          | 13.1991983  | 24.16870446 | 22.76541274 | 22.73939893 | 36.64150351 |
|          | 23.43793277 | 65.39316048 |             |             |             |
| TRAV9-2  | 60.43870697 | 91.39228534 | 39.20610994 | 220.3744213 | 498.4569511 |
|          | 911.8379139 | 448.8743703 | 656.9831726 | 1958.896333 | 113.9953881 |
|          | 56.17040361 | 22.09272622 | 47.77691068 | 27.28669595 | 23.52091869 |
|          | 17.66320162 | 27.7387923  | 33.54720142 | 14.88500975 | 38.63800306 |
|          | 102.811815  | 130.9175576 |             |             |             |
| TRBC1    | 575.8478308 | 930.328823  | 525.0492335 | 8923.922332 | 12460.73946 |
|          | 10179.78364 | 3287.836318 | 16623.7078  | 19876.20631 | 5338.319292 |
|          | 4520.50562  | 2812.593654 | 78.94320693 | 56.8335872  | 223.4955364 |
|          | 131.0995558 | 189.1209091 | 145.715446  | 114.6022938 | 47.87130436 |
|          | 551.5102039 | 181.0122765 |             |             |             |
| TRDC     | 88.17850315 | 81.15497901 | 101.0670278 | 3014.575466 | 282.0101621 |
|          | 781.3316356 | 486.8794819 | 370.2752613 | 124.6527289 | 17980.35398 |
|          | 10797.21174 | 11382.00872 | 61.01801703 | 30.12404697 | 22.31868643 |
|          | 24.26650252 | 46.6420448  | 30.42258616 | 247.3533379 | 209.0182876 |
|          | 165.8509884 | 162.1231973 |             |             |             |
| TREM1    | 415.2301184 | 236.6369111 | 211.1048289 | 102.2864477 | 116.8363113 |
|          | 67.49889477 | 71.26574474 | 101.4843406 | 66.50026811 | 574.8694989 |
|          | 79.85743138 | 95.75746526 | 1775.188919 | 603.8863807 | 194.7254774 |
|          | 184.6497911 | 222.6374113 | 317.7853076 | 285.3975429 | 685.7072276 |
|          | 377.9594713 | 8433.289331 |             |             |             |
| TREM2    | 17.00788201 | 11.99552131 | 19.32045331 | 16.18514962 | 14.88173325 |
|          | 16.93010618 | 12.76669965 | 14.95790508 | 101.0745387 | 14.19593878 |
|          | 13.80468131 | 14.68548476 | 24.23855513 | 2158.627387 | 160.8316593 |
|          | 3999.017687 | 6016.863497 | 928.15125   | 391.2846329 | 611.704972  |

|         |             |             |             |             |             |
|---------|-------------|-------------|-------------|-------------|-------------|
|         | 16.04376238 | 24.6518745  |             |             |             |
| TREML2  | 70.53816317 | 20.8510013  | 42.35560264 | 23.09902116 | 50.87816452 |
|         | 18.783374   | 52.41361977 | 57.35568408 | 59.68920701 | 35.87929016 |
|         | 55.01920603 | 123.3281827 | 40.72889444 | 27.33242059 | 32.02053189 |
|         | 32.60848091 | 32.7416014  | 27.32785335 | 101.9682716 | 38.88556376 |
|         | 577.2525196 | 1082.741035 |             |             |             |
| TRIB2   | 1848.219528 | 915.3236717 | 262.8037637 | 1138.062023 | 2278.453629 |
|         | 2377.362513 | 275.8348106 | 5890.338133 | 839.9304115 | 754.1562238 |
|         | 1307.778436 | 1049.5197   | 123.0323791 | 152.1388719 | 71.30464757 |
|         | 255.2096152 | 126.8179678 | 1949.185675 | 1394.871276 | 311.6530554 |
|         | 155.8993479 |             |             |             |             |
| TRPM4   | 7.691250656 | 6.199378707 | 63.7178043  | 7.796755019 | 17.98120025 |
|         | 9.463569762 | 9.520155138 | 11.62316713 | 6.76116021  | 8.48672507  |
|         | 7.443654876 | 7.702553769 | 18.36114786 | 14.40413982 | 248.6383328 |
|         | 237.2475823 | 28.55293563 | 34.88330592 | 16.83475086 | 16.02878528 |
|         | 22.68943065 | 10.22097545 |             |             |             |
| TRPM6   | 45.92245257 | 35.63102651 | 64.55045854 | 25.76719358 | 16.86720259 |
|         | 31.1038533  | 63.79022174 | 32.92379314 | 19.946392   | 59.15056029 |
|         | 22.10779339 | 30.99587635 | 35.69642216 | 27.7197468  | 22.77650595 |
|         | 16.04544391 | 21.83288519 | 33.4402678  | 20.64070077 | 17.97104758 |
|         | 515.1758508 | 220.431397  |             |             |             |
| TSHR    | 19.81562324 | 17.26446055 | 95.35040447 | 11.64652927 | 11.34522644 |
|         | 13.71677829 | 7.644655016 | 236.3005486 | 11.89081812 | 15.28593998 |
|         | 20.15779147 | 12.75467855 | 14.29339998 | 15.60070061 | 9.442115885 |
|         | 7.808323788 | 19.79865996 | 22.62901303 | 20.59108368 | 9.980145399 |
|         | 17.61165132 | 18.38429613 |             |             |             |
| TTC38   | 24.85041048 | 25.03368325 | 39.64729475 | 374.209498  | 118.0039289 |
|         | 26.49834722 | 57.41736661 | 172.2330604 | 43.28600708 | 427.6618803 |
|         | 2894.462666 | 662.1427421 | 105.6462644 | 91.99909893 | 437.3613074 |
|         | 328.9820884 | 95.294272   | 143.9588074 | 458.4207043 | 370.5910615 |
|         | 155.2070688 | 47.0570675  |             |             |             |
| TXK     | 309.7698509 | 195.384424  | 85.82317784 | 676.0594416 | 1384.385645 |
|         | 426.3148568 | 175.3835932 | 206.762571  | 166.3675052 | 319.0374935 |
|         | 1564.533681 | 2015.56144  | 62.96991111 | 64.00962037 | 86.84214478 |
|         | 154.3565359 | 82.39792906 | 85.15990882 | 173.7054259 | 201.212217  |
|         | 201.2173366 | 173.9732072 |             |             |             |
| TYR     | 15.49172903 | 15.24296718 | 15.0813304  | 10.627147   | 44.38209766 |
|         | 197.0884279 | 37.45017394 | 6.818438323 | 1778.505105 | 304.5548851 |
|         | 71.99864479 | 51.17855685 | 14.06800259 | 36.31423107 | 25.02917588 |
|         | 31.80183546 | 32.73142982 | 12.31353089 | 142.7673868 | 104.4652597 |
|         | 13.13836219 | 150.834091  |             |             |             |
| UBASH3A | 10.12600478 | 12.70263006 | 8.087608443 | 876.3804334 | 2177.794994 |
|         | 714.9395195 | 203.0783034 | 935.0097588 | 1376.318036 | 319.0941238 |
|         | 6.038374156 | 8.533286435 | 6.105136566 | 4.993003471 | 8.795522384 |
|         | 8.195551244 | 4.841232059 | 5.677166893 | 13.69796446 | 17.94318894 |
|         | 59.1375484  | 10.09959562 |             |             |             |
| UGT1A8  | 680.5299008 | 471.1925779 | 163.9010445 | 82.13823081 | 98.52007343 |



|             |             |             |             |             |
|-------------|-------------|-------------|-------------|-------------|
| 123.3281827 | 101.445586  | 93.50382185 | 450.365002  | 462.5102909 |
| 78.13378227 | 85.31836726 | 91.50678971 | 96.13395165 | 55.51233152 |
| 55.04284584 | 85.82524233 | 54.24689175 | 63.86973215 | 59.03064075 |
| 97.15471911 | 336.4203983 |             |             |             |
| UGT2B17     | 29.46022982 | 12.69818111 | 309.8818349 | 3.976053906 |
|             | 5.598819437 | 4.541614018 | 7.819769102 | 8.39783357  |
|             | 4.743273044 | 6.482478073 | 7.244351309 | 6.408970503 |
|             | 7.395068314 | 6.871949567 | 9.056114065 | 5.248499675 |
|             | 9.001148941 | 8.791555748 |             | 5.642280383 |
| UPK3A       | 15.1818271  | 14.61683336 | 17.258479   | 10.97861145 |
|             | 13.64441885 | 20.18467535 | 10.91012024 | 20.9331605  |
|             | 10.8839878  | 9.961241592 | 215.8718015 | 12.12418525 |
|             | 7.6068206   | 10.60159881 | 15.10114829 | 10.7435039  |
|             | 25.62748279 | 18.54314925 |             | 15.4131337  |
| VILL        | 29.52223049 | 34.59261182 | 53.86489096 | 434.2235247 |
|             | 500.1222764 | 32.85440556 | 445.3565484 | 38.85635157 |
|             | 215.5413192 | 39.83941898 | 97.78124023 | 43.06693373 |
|             | 129.9134995 | 21.08681353 | 20.96596084 | 102.4969037 |
|             | 23.66126097 | 20.88408586 |             | 138.1446793 |
| VNN1        | 22.95842907 | 21.92466999 | 16.71107549 | 12.26655159 |
|             | 11.49823256 | 6.881696305 | 4.556712661 | 50.60131657 |
|             | 62.57962649 | 27.08777116 | 1024.700138 | 924.7365315 |
|             | 120.6402118 | 158.589962  | 37.60366073 | 68.02099242 |
|             | 64.48867363 | 894.8557203 |             | 40.75362109 |
| VNN2        | 64.9845649  | 79.68108191 | 51.04583679 | 445.4839483 |
|             | 87.43886769 | 7.680556652 | 183.1808863 | 81.25132533 |
|             | 600.7634958 | 133.9832531 | 3300.115435 | 462.8123954 |
|             | 8.255798098 | 6.33332463  | 7.339096499 | 242.3176356 |
|             | 9.753158043 | 18515.3558  |             | 17.98841772 |
| VNN3        | 30.92999926 | 32.29662574 | 10.57301826 | 13.07856517 |
|             | 28.54732378 | 26.89503329 | 36.41518352 | 85.4261616  |
|             | 22.08322245 | 44.53194026 | 187.5997533 | 28.65180995 |
|             | 60.50951351 | 19.03566519 | 20.43299213 | 47.36063389 |
|             | 79.94263155 | 2232.466996 |             | 42.19644363 |
| VPREB3      | 3778.568055 | 2591.601205 | 404.2572521 | 89.69557529 |
|             | 166.1221545 | 154.18198   | 86.99944061 | 335.2264761 |
|             | 126.7365483 | 114.2787683 | 136.159858  | 88.97247865 |
|             | 111.6979924 | 91.99785705 | 129.4706451 | 73.26322789 |
|             | 89.86960473 | 157.9569892 |             | 68.47189386 |
| WNT5B       | 11.75096777 | 11.14541251 | 48.95771465 | 10.61879975 |
|             | 8.393614631 | 9.272327825 | 17.98120025 | 11.6468939  |
|             | 6.098592957 | 9.789026033 | 15.97840064 | 11.93775629 |
|             | 533.28442   | 99.77388102 | 132.7650466 | 23.59480205 |
|             | 12.38883289 | 15.95349649 |             | 13.46299768 |
| WNT7A       | 12.86019319 | 17.53933245 | 20.33283198 | 101.4088521 |
|             | 87.39996412 | 46.54002774 | 100.096916  | 51.70572802 |
|             | 11.09709075 | 13.79321282 | 56.25300857 | 20.27568968 |
|             |             |             |             | 23.34134802 |

|         |              |              |              |              |              |
|---------|--------------|--------------|--------------|--------------|--------------|
|         | 10. 34392287 | 17. 52213467 | 28. 44004811 | 21. 12626859 | 16. 1427751  |
|         | 57. 16727492 | 21. 34233197 |              |              |              |
| ZAP70   | 13. 7050941  | 12. 81144157 | 13. 36812571 | 3230. 539852 | 4287. 536344 |
|         | 2667. 26621  | 772. 7826189 | 7380. 970003 | 1758. 634939 | 1422. 384713 |
|         | 4781. 948859 | 1772. 000761 | 38. 05970681 | 18. 46666377 | 25. 55686935 |
|         | 32. 52035914 | 19. 14980044 | 26. 83408716 | 24. 08409421 | 38. 3203582  |
|         | 185. 4848873 | 70. 04945364 |              |              |              |
| ZBP1    | 35. 84871042 | 74. 5068251  | 450. 6459844 | 149. 2911945 | 184. 7781077 |
|         | 162. 5267903 | 27. 55771004 | 71. 30464757 | 144. 075716  | 106. 9247563 |
|         | 499. 9477503 | 127. 0420484 | 24. 54237397 | 14. 89516342 | 16. 16358042 |
|         | 22. 09272622 | 10. 54629785 | 25. 50635842 | 13. 08437525 | 28. 70340729 |
|         | 143. 7111215 | 269. 6190106 |              |              |              |
| ZBTB10  | 152. 6895498 | 99. 22415511 | 95. 56043531 | 99. 88073058 | 109. 5758377 |
|         | 91. 36792646 | 83. 06394836 | 1221. 65228  | 4. 246104982 | 179. 029292  |
|         | 122. 4353858 | 106. 5387015 | 62. 01375558 | 65. 65921306 | 222. 3082742 |
|         | 74. 03494821 | 76. 59712517 | 773. 9507313 | 117. 0610741 | 216. 3804759 |
|         | 144. 6296186 | 20. 31580867 |              |              |              |
| ZBTB32  | 9. 857216379 | 193. 1962311 | 12. 93200847 | 27. 83511    | 29. 13250856 |
|         | 7. 771095444 | 187. 3923151 | 24. 71873759 | 112. 5857434 | 29. 81729559 |
|         | 16. 3475771  | 12. 38711595 | 10. 52648555 | 10. 28530289 | 223. 0243338 |
|         | 14. 98197508 | 10. 56712858 | 71. 90536722 | 11. 02017204 | 8. 852017078 |
|         | 57. 7649518  | 12. 27627866 |              |              |              |
| ZFP36L2 | 923. 602815  | 661. 8816941 | 485. 6449165 | 3227. 833526 | 357. 0079722 |
|         | 3731. 327234 | 366. 0960572 | 641. 8482849 | 2943. 240501 | 154. 9349031 |
|         | 915. 0156182 | 263. 103889  | 1341. 516598 | 297. 4815667 | 23. 57209837 |
|         | 303. 5769537 | 532. 3725666 | 124. 3001947 | 34. 42499963 | 54. 25282854 |
|         | 311. 9773023 | 517. 338976  |              |              |              |
| ZNF135  | 94. 28786122 | 16. 31493562 | 11. 40281159 | 64. 5605419  | 96. 20392388 |
|         | 15. 80624293 | 3. 236183763 | 31. 1690733  | 3. 228407856 | 42. 87083843 |
|         | 151. 1023562 | 79. 04663522 | 3. 860059178 | 8. 519318271 | 4. 99336445  |
|         | 39. 75712842 | 8. 279532213 | 2. 420046884 | 24. 37863287 | 14. 23180261 |
|         | 99. 10011749 | 1. 926397343 |              |              |              |
| ZNF165  | 6. 421545431 | 4. 431621524 | 74. 30319945 | 3. 190692616 | 33. 67116463 |
|         | 2. 724372492 | 45. 2032616  | 6. 147205936 | 5. 925447852 | 4. 898005565 |
|         | 7. 023083197 | 4. 897631255 | 2. 66873461  | 2. 372973625 | 4. 23966252  |
|         | 6. 080237169 | 2. 415107373 | 1. 83777562  | 4. 450391447 | 3. 139406165 |
|         | 5690. 382767 | 5. 357879252 |              |              |              |
| ZNF204P | 77. 87689746 | 42. 94621317 | 41. 07506248 | 151. 9597341 | 400. 6631845 |
|         | 168. 8951305 | 40. 0906413  | 52. 22897356 | 83. 76317704 | 129. 5986466 |
|         | 37. 01330204 | 32. 9745764  | 29. 90974572 | 26. 84363388 | 33. 02123349 |
|         | 27. 46127525 | 25. 55386032 | 36. 16594047 | 38. 88746337 | 25. 20670047 |
|         | 65. 48783698 | 27. 48554596 |              |              |              |
| ZNF222  | 9. 800664188 | 7. 20321789  | 11. 69136762 | 71. 91125741 | 56. 64251081 |
|         | 15. 0813304  | 15. 58990295 | 182. 9389251 | 10. 02779726 | 13. 84326232 |
|         | 92. 27882159 | 91. 80829026 | 19. 8606097  | 70. 82485981 | 47. 02936831 |
|         | 148. 6222178 | 86. 41818993 | 39. 91834899 | 222. 5736107 | 211. 4937423 |
|         | 346. 5564511 | 26. 82559709 |              |              |              |

|         |             |             |             |             |             |
|---------|-------------|-------------|-------------|-------------|-------------|
| ZNF286A | 737.8599039 | 331.9087607 | 73.88202193 | 218.2270364 | 5.598819437 |
|         | 169.3131278 | 190.8748431 | 118.138051  | 136.8685992 | 246.5038172 |
|         | 225.4077006 | 199.2998879 | 11.04393742 | 13.50584518 | 36.038732   |
|         | 21.87563888 | 15.08086286 | 280.7699313 | 77.84039621 | 25.83329275 |
|         | 7.473171396 | 441.3134689 |             |             |             |
| ZNF324  | 28.21199417 | 23.46442356 | 21.1733262  | 32.01125825 | 348.190389  |
|         | 27.16912681 | 24.0557628  | 179.5864792 | 63.46545944 | 45.38499365 |
|         | 44.94117978 | 42.90224117 | 28.71444884 | 26.20331776 | 37.88295257 |
|         | 112.914142  | 25.24781608 | 23.83651935 | 30.19634282 | 45.77517474 |
|         | 35.29328382 | 35.42469786 |             |             |             |
| ZNF442  | 19.71319664 | 22.44753254 | 19.39158332 | 32.11029942 | 8.980486469 |
|         | 9.182953598 | 3.103039674 | 44.70063347 | 47.38616861 | 180.8575692 |
|         | 21.77015125 | 40.95236426 | 12.30022875 | 31.35256239 | 71.64242608 |
|         | 36.61226829 | 48.30333449 | 96.00867374 | 79.06662655 | 3.646156403 |
|         | 40.29650854 | 20.15752219 |             |             |             |
