# Supplementary material
Source: publisher site journal article supplement (https://www.dovepress.com/article/406644)
Supplement: Supplementary file 5 [file Appendix_2D.pdf › Appendix_2D.pdf]

id B cells naive B cells memoryPlasma cells T cells CD8 T cells CD4 naive T  
cells CD4 memory resting T cells CD4 memory activatedT cells follicular helper  
T cells regulatory (Tregs) T cells gamma deltaNK cells resting NK cells  
activated Monocytes Macrophages M0Macrophages M1Macrophages M2Dendritic cells  
resting Dendritic cells activated Mast cells resting Mast cells activated  
Eosinophils Neutrophils

GSM5413223\_con0 0.104749278610011 0 0.172326824959079 0  
0.056469773351524 0 0.0292195614496039 0.0235691507479834  
0.0249057012654309 0 0.0869946962127498 0 0.130638315196273  
0.0397046413484201 0.264471664464473 0 0.00912082887671827  
0.0225089235300642 0.0353206399876691 0 0  
GSM5413224\_con0 0.0954932806230432 0.0449105580478456 0.0331785629043204 0  
0.127086609198611 0.0674898468267132 0.0212745373458506 0  
0.0523102301000064 0 0.0209184856945133 0 0.183833021682787  
0.111919421133773 0.0142462149243592 0.0154555315160058 0 0  
0.134562194113551 0.000446308011643407 0.0768751978769773  
GSM5413225\_con0 0.176737209951254 0.103278608244534 0.0680069393197656 0  
0.0823081143936579 0.0732401278678521 0 0.0208365792444491 0  
0.0359122322306369 0 0 0.162624839799957 0.0331075202241341  
0.0532086526359289 0 0 0 0.131898506647984 0 0.0588406694398459  
GSM5413226\_con0 0.0795459938064519 0.0157619242965286 0.0329732623429073 0  
0.199405892236462 0 0.0252473232266018 0.0137151404064155  
0.001529271303221020 0.0540103532099766 0.000782449029109179  
0.100596455834977 0.089409706839277 0.180965247141135 0.0317599592115231 0  
0.0498068624640789 0.084151441331961 0 0.0403387173193736  
GSM5413228\_con0 0.210214687227891 0.0679547267447979 0.0165463279946984 0  
0.0903177862856567 0.117741380338972 0 0.0234942699256246  
0.0292431120059606 0 0.0175536292775669 0.00278927583047282  
0.110958495214517 0.110516514956193 0.0795481437701916 0.00292018819186764  
0.005155405342541720.008420405972139680.0842385744081195 0  
0.0223870765127872  
GSM5413229\_con0 0.136837293104611 0.0127952948933264 0.0540603803618543 0  
0.164337319284958 0.0405898869922794 0 0.0234700572034146  
0.0403644831637923 0 0.0470574668505375 0 0.10025471653039  
0.0398054550227092 0.194896759748936 0 0 0.0698987443707246  
0.0551975826640385 0.0162470591871474 0.00418750062128061  
GSM5413230\_con0 0.0840498051059221 0 0.0762754454486792 0  
0.175212569272063 0.0409841370515754 0 0 0.0564422035591882 0  
0.0833164391413166 0 0.0499538481239174 0.0895187337018449  
0.136678470149839 0.0316147114711105 0.0105772112373629 0  
0.163867356010041 0 0.00150906972713922  
GSM5413231\_con0.009044392624080590.0934612021759936 0 0.012279438582057 0  
0.100444639231127 0.054795267685229 0.0234859890879966 0.0295485713158801 0  
0.001297591001153620.023297729452547 0 0.222537009214285  
0.137954347790109 0 0 0.0189542326788832 0 0.172984988304955 0  
0.0999146008557024  
GSM5413232\_con0.0876001862801119 0.0747817790850403 0 0.0783792099171052 0

0.178000566555707 0.001597056544912810 0.0811774374109077  
0.001159635490434530 0.0552527756718484 0 0.0959236538212837  
0.0796913215257201 0.173219345700749 0 0 0.00914385214564266  
0.0593216139286055 0 0.0247515659219312  
GSM5413233\_con0 0.0792017019929799 0.008638797118628120.0157936014900823 0  
0.114321491478425 0 0 0.0668508882628404 0.0266437905053264 0  
0.0511907278185215 0 0.113978211530781 0.0483309037445523  
0.15046617183731 0 0 0.298989615124106 0.000489395929605404  
0.0126806765868382 0.012424026580003  
GSM5413234\_con0 0.0468822588760422 0.0211385065216542 0.0891000870206148 0  
0.146430319197863 0.0351933508222194 0 0 0.0714865512449828 0  
0.0364761362637828 0 0.0132854591199413 0.0165789102144498  
0.106674956023385 0.0496339295688251 0.0150292372056011 0  
0.346581143313763 0 0.00550915460687647  
GSM5413235\_con0 0.0278631612027606 0.0113847895729982 0.00307615419261298  
0.0658299616413996 0 0.160497145392125 0.0245292945757022  
0.000540744391656633 0.0217658565307684 0 0.056657523813985 0 0  
0.0484438060618852 0.0350584128055845 0.241827322735318 0 0  
0.25200807194984 0.0323524131371445 0.0181653419962198 0  
GSM5413236\_con0 0.305649381554461 0.0287543985749206 0.0190173785863343 0  
0.067089947355511 0.0935366865158727 0.0201141424839477 0.0188478428218938  
0.0545616312159397 0 0.0128518416453743 0 0.16037495052866  
0.0769671347319502 0.0413983822059344 0 0.010042665184197  
0.0503265435767627 0.007074634695560720 0.0333924383226799  
GSM5413238\_con0 0.274729627143822 0.0312563656498612 0 0  
0.0896401165576052 0.0413019770675789 0 0.0328867248278633  
0.0584162234672903 0 0.0524539118573834 0 0.145402111567001  
0.0502259825777286 0.124231413027368 0 0.0220510288131019  
0.0117827761557748 0.0589370794334655 0 0.00668466185415584  
GSM5413240\_con0 0.040115513390336 0.007475008416789080 0  
0.0839622926352076 0.0593100902659635 0 0 0.0134282863658287 0  
0.0931770314333787 0 0.038397467372041 0.0769796172926799  
0.108973439538911 0.0637072099810979 0 0 0.280516696561951  
0.0976062366933437 0.036351110052472  
GSM5413241\_con0 0.0663289465697658 0.0662506193672822 0.0352343504786636 0  
0.112097839554352 0.0899671888203184 0 0 0 0 0.0467677735846946  
0.018652831725037 0.0824101713600768 0.0550690935520444 0.101910909827359  
0.0206124376138664 0 0 0.196530634090233 0.0153514455212689  
0.0928157579350388  
GSM5413242\_con0 0.0412018246080748 0.039156625378652 0.0251635326043285 0  
0.21659010944992 0.0551494489008856 0 0.0046673309861194  
0.0430119090156092 0 0.0561959657535761 0 0 0.0518652161557082  
0.191122516305651 0.0803681978747646 0 0.0122457262373665  
0.133150387798876 0.0213910320583611 0.0287201768721073  
GSM5413244\_con0 0.0751554662094113 0 0.0999853537629397 0  
0.115489009509714 0 0.008975156641537040.0578191965380118 0 0  
0.0551169260298805 0 0.0800652624866267 0.0839937160113191

0.219943756852869 0 0 0.135965675624957 0.0540618896500786  
 0.000842150302559783 0.0125864403800944  
 GSM5413245\_con0 0.0238830293348133 0.0720062311627575 0 0.0705077010346093 0  
 0.0734274344568109 0.0845433486114799 0.009158692836484770.0100141944511796  
 0.0826446525231317 0 0 0.117979986449216 0.12967471880698  
 0.114739063359222 0 0.0213097142324392 0.0748148675667933  
 0.0935176257968398 0 0.0217787393772429  
 GSM2332099\_con0 0.0636145291156121 0 0.154010696792191 0  
 0.0384108752095107 0.0223331996714124 0 0.0246183695371396  
 0.0745552730237193 0 0.0366912669386527 0 0 0.03578802184468  
 0.201396823211479 0.0960099948301805 0 0.210796285127243 0  
 0.0417746646981799 0  
 GSM2332108\_con0 0.102026820850353 0.0153709161126541 0.0506765128166447 0  
 0.107253447098783 0.0350050511060528 0.03834778711644 0 0 0  
 0.0872075431411162 0 0.012849641595051 0.101093930858874  
 0.267409562846914 0 0 0.164617228192703 0 0.0181415582644145 0  
 GSM5413247\_treat 0 0.179884122990237 0 0.0895733597924493 0  
 0.000185033852317489 0.0503333625609615 0.0225988424897088  
 0.0291610234076562 0.0569103255714875 0 0.009776495111351080  
 0.191619528225433 0.132749058544377 0.0391091598476646 0  
 0.0140721343466507 0 0.12250041031278 0 0.061527142946925  
 GSM5413248\_treat 0 0.152858227944583 0.0364764043971775 0.0345566572718694 0  
 0.07352287689802 0 0.0334844861741357 0 0 0 0.0759347056397682 0  
 0 0.0529971548903796 0.18764543728859 0.0324157287774267 0 0  
 0.32010832071805 0 0  
 GSM5413250\_treat 0 0.0956855266782425 0.0217820963973785 0.001651300691164850  
 0.101392339135282 0 0.0478202047813756 0.000770504438693399  
 0.0144224380089791 0 0.0893770426080524 3.99085396858463e-05  
 0.190907807719179 0.106999231275474 0.115994198460958 0.0141098496029663 0  
 0 0.152261379162394 0 0.0467861725001743  
 GSM5413251\_treat 0 0.0972950890251965 0.0344606636172266 0 0  
 0.117998283160899 0.0496104838697419 0.0103934340615986 0.0128993712673416 0  
 0.0310211629781824 0.0223692752467423 0.0470902043709232 0.222375859289174  
 0.107772633285071 0.0348509981965397 0 0.0046033645322777 0  
 0.130415522543303 0 0.0768436545557822  
 GSM5413254\_treat 0 0.157976487504758 0.0149880717758983 0 0  
 0.230554196920379 0.0459340652898172 0 0.0225024859463466 0 0  
 0.0533158287733352 0 0.0677374081163714 0.0553843862856676  
 0.215834843055492 0.0172744407245396 0 0.0166257591297122  
 0.0800521353521718 0.01592634642563 0.00589354469988144  
 GSM5413255\_treat 0 0.186208560176018 0.0149601379814741 0.0166767356720945 0  
 0.100747647013525 0.126857329575649 0 0.0423532870476256  
 0.0326606711877643 0.0177764238648111 0.006520086789417780  
 0.159691056687055 0.119314535680475 0.0785430250209019 0 0 0  
 0.0756720706720307 0.009471482624819980.0125469500063377  
 GSM5413256\_treat 0.0599867333398612 0.22467591707967 0 0.124169300858443 0  
 0.102534705223349 0.0946617630869298 0 0.030596736497018

0.0403471125675377 0 0.0102178132852545 0 0.0463581317357697  
0.0265024187833858 0.149881859462591 0 0.014842047205201  
0.0289860397204866 0.0431035569369348 0.003135864217567420  
GSM5413257\_treat 0 0.136922385558707 0.0438887226500981 0.0197530186262617 0  
0.141593538894188 0.0886511478903506 0 0 0.0157040363676004  
0.003285202351122370.0478120439865369 0 0.0648424940822123  
0.0865433356006535 0.0921016189831753 0.0284927918183099 0.0358648088334256 0  
0.130501467289449 0 0.0640433870679091  
GSM5413258\_treat 0.0424700277028871 0.142178098048572 0 0.042993549305745 0  
0.307946884304365 0 0 0 0.0204377903591661 0 0.0585820100417117 0  
0.0992138137531763 0.044118221724196 0.0999593083786163 0 0  
0.0570197377613182 0.0850805586202467 0 0  
GSM5413259\_treat 0 0.130167855790122 0.0232986291066649 0.006833339344179350  
0.147248457228112 0.0332492539046755 0.002951089842910420.0254742331828549  
0.0105776428411036 0.0286649736814399 0 0.00405939420157891  
0.224958395697024 0.0840449059607262 0.112209299211963 0.0053516337526587  
0.007864466384025670 0.0947265705897431 0 0.0583198592802175  
GSM5413261\_treat 0 0.0964276598884077 0.006211729709873260.0487592816963033 0  
0.174113710985847 0.0516603202569842 0 0.0253146706044581  
0.0418941061465999 0 0.0700248233920541 0 0.0520531171589928  
0.0776181207645993 0.21112151118416 0.0361758216442369 0  
0.0912735594974529 0.000739162623437166 0 0.016612404446594  
GSM5413262\_treat 0 0.098836495122901 0.003366824437832040 0  
0.129850358659249 0.0871897285869743 0.0198257386948239 0.00475281936876834  
0.0245934203146202 0.0325624367624409 0.007061188774632460  
0.274572195920965 0.129380679037538 0.0592890150519051 0 0  
0.0090743440963798 0.0709853283143814 0 0.0486594268565882  
GSM5413263\_treat 0.005126206924506190.36751647438248 0 0.0342162885223754 0  
0.0920523191657201 0.0251033398008354 0 0.015569088810018  
0.0557561611594952 0 0.021440433495064 0 0.0584185093653839  
0.035174138043825 0.165175161204703 0 0.0318440266198715  
0.0926078525057216 0 0 0  
GSM5413264\_treat 0 0.145231499954278 0.011381564838167 0.0346813958567809 0  
0.143032722429414 0.0332250046840629 0 0.0223876452583283 0 0  
0.0749987545158773 0 0.0680356152639184 0.168729090188518  
0.138526479124472 0.0198134627527635 0 0 0.109183625855658 0  
0.0307731392777602  
GSM5413265\_treat 0 0.144081919233712 0.0319194648549766 0.019132077917613 0  
0.0949163549815998 0.0107185916881162 0.0168889144242998 0  
0.0203286851848734 0 0.0475826730011884 0.00537256384290567  
0.127984111788688 0.148919811283921 0.108489894463454 0 0 0  
0.169384150231529 0.0180828095077825 0.0361979775953405  
GSM2332119\_treat 0.0321606026176732 0.219064407045048 0 0.0810134664900413 0  
0.0873747290533907 0.0677858787754295 0 0.0195121132452281 0  
0.0231472140808653 0.007397133483765780 0.0984429166162721  
0.058812252652452 0.188391127214673 0.008389042184691080.00120774225703054  
0.093304805695009 0.005803143338717860.008193425249712740

|                      |   |                      |                      |                      |
|----------------------|---|----------------------|----------------------|----------------------|
| GSM2332120_treat     | 0 | 0.0808840198846246   | 0.002095847655473730 | 0                    |
| 0.19428407481723     |   | 0.0218060586768398   | 0.0478129175758115   | 0                    |
| 0.0132855547557389   |   | 0.0125674710047837   | 0.145576766334266    |                      |
| 0.122415450756517    |   | 0.0860824395676398   | 0.006716084903643520 |                      |
| 0.125524890119464    | 0 | 0.140948423947968    |                      |                      |
| GSM2332121_treat     | 0 | 0.0881953557484355   | 0.0952556179326998   | 0                    |
| 0.105444950739377    |   | 0.0846986557840589   | 0.0302508705044963   | 0                    |
| 0.0399117222795958   | 0 | 0.0585501830379545   | 0.0968606603575555   |                      |
| 0.208782726255889    |   | 0.006044411185235530 | 0.0992702706221208   |                      |
| 0.0310873883854165   |   | 0.005476413312984790 | 0.0501707738541806   |                      |
| GSM2332122_treat     | 0 | 0.0493824295255178   | 0.0197254221819722   | 0.0227261937035017   |
| 0.106691702939591    |   | 0.0478711104605132   | 0.038531550702342    | 0.00135012183179118  |
| 0.0093841088457616   |   | 0.0184935103229108   | 0.0447333501565632   | 0                    |
| 0.188571162812798    |   | 0.146279697410371    | 0.167071837886529    | 0.005466835972323090 |
| 0.129801232679914    | 0 | 0.00391973256760074  |                      |                      |
| GSM2332123_treat     | 0 | 0.154915096242204    | 0.064669077227163    | 0.005775317971669260 |
| 0.152413949381617    |   | 0.0535559984498773   | 0.00924168936316721  |                      |
| 0.025558491404936    | 0 | 0.0378189785572326   | 0.25746308781202     |                      |
| 0.0673497350476658   |   | 0.0758217786197915   | 0.004598621436841090 |                      |
| 0.0885003026236439   |   | 0.002317875862171490 | 0                    |                      |
| GSM2332124_treat     | 0 | 0.115091961954192    | 0.0135597307024668   | 0.0707971626245994   |
| 0.177766936850294    |   | 0.043964775536329    | 0.0259833409671403   |                      |
| 0.0068914046145243   |   | 0.0320439762663977   | 0.0388572521094729   |                      |
| 0.0607752675043503   |   | 0.161721406957712    | 0.00665564444556522  |                      |
| 0.198549994905741    |   | 0.0110322377476027   | 0.0313870067075183   | 0.00492190010609379  |
| GSM2332126_treat     | 0 | 0.182879917527068    | 0.0170506411735845   | 0.003076519740180870 |
| 0.115652909217217    |   | 0.0323923862807488   | 0.0231416253437275   |                      |
| 0.006558319592791590 |   | 0.0333059933643038   | 0.0960938146531822   |                      |
| 0.0503513943037505   |   | 0.127597066160473    | 0.007177901103442740 | 0.00838534312876454  |
| 0.263719145395697    |   | 0.0190623872422922   | 0.0135546357727756   |                      |
| GSM2332127_treat     | 0 | 0.0969207904747203   | 0.0377261840545664   | 0                    |
| 0.162208283773364    | 0 | 0.0113376887396411   | 0.019407551117819    | 0                    |
| 0.0550029416351026   | 0 | 0.0108232084663531   | 0.0778385437516064   |                      |
| 0.180699423766082    |   | 0.0318144777459924   | 0.225898385358781    |                      |
| 0.0433095345707047   |   | 0.0470129865452668   |                      |                      |
| GSM2332128_treat     | 0 | 0.193510861497847    | 0.0260991606746808   | 0                    |
| 0.0762947548891563   |   | 0.0743486012441518   | 0.003379441611662540 | 0                    |
| 0.0566130156482455   | 0 | 0.169380265922081    | 0.087424349666607    |                      |
| 0.0617621536302301   | 0 | 0.119683450758354    | 0.0136194879843489   |                      |
| 0.117884456472635    |   |                      |                      |                      |
| GSM2332130_treat     | 0 | 0.178316228267465    | 0.0308251804862719   | 0.0306586492481112   |
| 0.197331652828476    |   | 0.0208656813544404   | 0.0452497203905311   |                      |
| 0.0397836310192696   | 0 | 0.0118858791512399   | 0.122881944257845    |                      |
| 0.0761054862802017   |   | 0.0729703005372287   | 0.0288267585638725   | 0.00640254345416874  |
| 0.0532604552797123   |   | 0.0537857887628055   | 0.0308501001183613   |                      |
| GSM2332131_treat     | 0 | 0.0988575278494639   | 0.0241830392378731   | 0                    |
| 0.214603266520057    |   | 0.0728049911903085   | 0.0190820659456774   |                      |

0.005932289530308330.038950448548136 0 0.0917475875150065  
 0.100017786084671 0.144154997080942 0 0 0.121810264019722  
 0.0217962737091484 0.006995877041357510.0390635857273284  
 GSM2332133\_treat 0 0.186890420825946 0.0300627103970139 0.0196648687870002 0  
 0.107719976407579 0.0872392019883247 0 0.0321417263512727  
 0.000997468156107185 0.007742820898097120 0 0.0894248525250576  
 0.0736589476258652 0.129690909547496 0 0.00741037644521185  
 0.0980200612933557 0.0938297374406568 0 0.0355059213110157  
 GSM2332134\_treat 0 0.0365629483885107 0 0.0755906347846082 0  
 0.125007832121309 0.0456416569075875 0 0.006043749870668740 0  
 0.0317508124671598 0 0.190441145700758 0.0800207729008686  
 0.190865410502528 0 0 0.09141023199851 0.0755361843778125 0  
 0.0511286199796791  
 GSM2332135\_treat 0 0.110302518219338 0.0151939974845066 0.0497101362525528 0  
 0.0934688908318865 0.0965192457115185 0.004538156079686540.0356664396825629  
 0.0427576447270399 0.001739171743247010.004118161353355030  
 0.228441706685999 0.0597595742635444 0.0695905469737662 0  
 0.005607615467786810.0339722769385736 0.0937462667169842 0  
 0.054867650867652  
 GSM2332137\_treat 0 0.135992627214998 0.0174742543325696 0 0  
 0.185569902766219 0.0373979564710977 0 0.00676159136911792  
 0.0699313372360787 0 0.0338384319295614 0 0.0617388944650226  
 0.122506141388262 0.156747084672636 0 0 0.0471499853253785  
 0.0584565938809636 0.0219829558457792 0.0444522431023156  
 GSM2332138\_treat 0 0.193467927437219 0.0435203322409269 0 0  
 0.165233702469435 0.0461340159927533 0 0.00775869664229264  
 0.030531973793046 0 0.067528838655661 0 0.095890800279375  
 0.0849366157694368 0.120933434865253 0 0 0.137663634714903 0  
 0.001131474238676990.00526855290102147  
 GSM2332139\_treat 0 0.159984785185129 0.009290166848351690.0218384598837707 0  
 0.172950916989394 0.0426784181457255 0 0.0241879959205715  
 0.0323677936844148 0 0.0430363773731769 0.0083763450810131  
 0.041425305436223 0.10064930331721 0.154455636962439 0.0684090863123971 0  
 0.0313499645075158 0 0.007341328572622070.0816581157800467  
 GSM2332140\_treat 0 0.161819814048747 0 0.0825691065809864 0  
 0.0852669868910768 0.0772202788742546 0 0 0.0330121903790273 0  
 0.0257424041146272 0 0.0691924825361665 0.134873240614722  
 0.138795971041957 0 0.0017524760770511 0.144184553914954  
 0.0272433881042397 0 0.0183271068221903  
 GSM2332141\_treat 0 0.171918800226303 0 0.0888091912476402 0  
 0.134149505525287 0.0836265560493127 0 0.0634139140255098  
 0.046913777370132 0 0.0177431539535792 0 0 0.0500540135767843  
 0.0691861542381678 0.0488596466272096 0.0518692435990451 0.0912145193192633  
 0.0643642712019454 0.009476597748260450.00840065529156005  
 GSM2332142\_treat 0 0.128215931079991 0.0189798101529691 0.0162941646118781 0  
 0.159439269350548 0.0113456840573804 0 0.00885996906805573  
 0.0236092275105013 0.0153475718384401 0.0253724649820337 0.011692878523999

|                  |                    |                      |                      |                     |                     |
|------------------|--------------------|----------------------|----------------------|---------------------|---------------------|
|                  | 0.156961608997647  | 0.112057483755185    | 0.090188815472964    | 0                   | 0                   |
|                  | 0.0779559431011917 | 0.0897032504280399   | 0                    | 0.0539759270691752  |                     |
| GSM2332143_treat | 0                  | 0.054025833266571    | 0.0324619912524426   | 0.149512719060568   |                     |
|                  | 0.0101719240743287 | 0.0140869282812947   | 0.0520946049276618   | 0                   |                     |
|                  | 0.0420040255818855 | 0                    | 0.0202532670030104   | 0.0528972279298994  | 0                   |
|                  | 0.221991258169546  | 0.13838098911767     | 0.170845249825934    | 0                   | 0                   |
|                  | 0.0372781766207884 | 0.003995804888400080 | 0                    |                     |                     |
| GSM2332144_treat | 0                  | 0.0346874627414002   | 0.0271025576293268   | 0                   | 0                   |
|                  | 0.0340839180498769 | 0.103025936190357    | 0                    | 0                   | 0                   |
|                  | 0.040053439419253  | 0.0613314569562481   | 0.193067039063075    | 0.0254665033152604  | 0                   |
|                  | 0.0166999280402412 | 0                    | 0.288606035890342    | 0                   | 0.0878319399235027  |
| GSM2332145_treat | 0                  | 0.112225175679582    | 0.0135099074866824   | 0                   | 0                   |
|                  | 0.195163907905623  | 0.0449929288586541   | 0                    | 0.0149396700384258  |                     |
|                  | 0.0136007926643065 | 0.0449549602234697   | 0                    | 0.00193277045483023 |                     |
|                  | 0.126377726051197  | 0.0503345242020033   | 0.139938911098334    | 0                   |                     |
|                  | 0.02094747023699   | 0.0187827713296685   | 0.0880543199016945   | 0                   |                     |
|                  | 0.114244163868539  |                      |                      |                     |                     |
| GSM2332147_treat | 0                  | 0.0720354374630285   | 0.0173499913116184   | 0                   | 0                   |
|                  | 0.150509797943457  | 0.079836271434702    | 0                    | 0                   | 0.0548097339140256  |
|                  | 0.0299434541682571 | 0.0167413526751119   | 0.104557477453884    | 0.123815576664729   |                     |
|                  | 0.121219083935236  | 0                    | 0                    | 0.127046729455397   | 0.00943265010540292 |
|                  | 0.0927024434751504 |                      |                      |                     |                     |
| GSM2332148_treat | 0                  | 0.0169331479369739   | 0.0447542319862245   | 0.0794807470656467  | 0                   |
|                  | 0.0832058682529835 | 0.0452782168466883   | 0.008248560430312050 |                     |                     |
|                  | 0.0146729754180256 | 0.0291457004143955   | 0.003792622251913910 |                     |                     |
|                  | 0.153836723463054  | 0.0894369892686125   | 0.135979756638225    | 0                   | 0                   |
|                  | 0.0737286226974545 | 0.100299704365227    | 0                    | 0.121206132964263   |                     |
| GSM2332150_treat | 0                  | 0.0875305328403192   | 0.0136114369248095   | 0.029553478726628   | 0                   |
|                  | 0.238044232073972  | 0.003599275773249090 | 0.0320782270390187   |                     |                     |
|                  | 0.0259303488909965 | 0                    | 0.0700972832417758   | 0.00556490547615614 |                     |
|                  | 0.0585646505467356 | 0.0693767419659964   | 0.18460687765012     | 0                   | 0                   |
|                  | 0.138100019532045  | 0                    | 0.0433419893181785   | 0                   |                     |
| GSM2332152_treat | 0                  | 0.137820810717024    | 0.0211290709054047   | 0                   | 0                   |
|                  | 0.0606441034484125 | 0.0872211582443871   | 0.0246977728716176   | 0                   |                     |
|                  | 0.0097109980396711 | 0                    | 0.0581540119615755   | 0                   | 0.0586591586070649  |
|                  | 0.0184284264795088 | 0.113187392648076    | 0.000400961376750064 |                     |                     |
|                  | 0.0111372318875805 | 0                    | 0.322421057180269    | 0                   | 0.0763878456326583  |
| GSM2332153_treat | 0                  | 0.086648860349476    | 0.0239813952591178   | 0.0389505072287429  | 0                   |
|                  | 0.126770909435917  | 0.0408640693657967   | 0                    | 0.0148228142362306  |                     |
|                  | 0.0512313860645302 | 0                    | 0.0149520255274564   | 0                   | 0.054584607046612   |
|                  | 0.106422942938804  | 0.203893119182644    | 0.022867812541103    | 0                   |                     |
|                  | 0.024764350255961  | 0.124462542641873    | 0.008797394659305120 | 0.0559852632664294  |                     |
| GSM2332154_treat | 0                  | 0.0943800810064808   | 0.0224339571106204   | 0.0699269426338566  | 0                   |
|                  | 0.0479064241383818 | 0.075591922373758    | 0                    | 0.0354515435635418  |                     |
|                  | 0.0444966821504167 | 0                    | 0.0121381836605619   | 0                   | 0.157997440144343   |
|                  | 0.070495233293494  | 0.12543388154249     | 0.0150856917894938   | 0                   |                     |
|                  | 0.147228945729188  | 0.0254010680525151   | 0                    | 0.0560320027750024  |                     |

GSM2332155\_treat 0 0.1040884432485 0.0424190266250909 0 0  
 0.167769370850957 0.0304581994968807 0 0.0466889044919057  
 0.009458862372559520 0.0386013668909545 0 0.138479914652898  
 0.103127281092361 0.143995203923564 0 0.000229953418296779  
 0.144773730408388 0 0.0143983662390231 0.0155113762886207  
 GSM2332156\_treat 0.006036794127248020.109926242596057 0.00418576326617017  
 0.0684523140206026 0 0.0636017101028959 0.0264086161409862 0  
 0.0436646713323598 0.0222558415288556 0 0.0437598755178207 0  
 0.0826647015263712 0.0926686681483979 0.217623752311564 0.006251794662840620  
 0.192371141310671 0 0.0201281134071595 0  
 GSM2332157\_treat 0 0.128730029770815 0.0293374821312832 0 0  
 0.0816651806076914 0.0483424065973526 0.006348763543091320.00813754331662119  
 0.125322091006657 0 0.0367434955003309 0 0.10592745894427  
 0.121216286813068 0.0938768532047874 0 0.0124337840261121  
 0.0791350839953277 0.0325569541576027 0 0.0902265863849883  
 GSM2332158\_treat 0 0.129080242488737 0.0420015723893588 0.00172228082498348  
 0.0153622061239885 0.0234788343364333 0.0433767094648443 0.003431960939221670  
 0 0 0.0517653723158622 0 0.201360274724523 0.0434602212060766  
 0.0807372366852322 0 0.003926557864806570 0.229552463285223 0  
 0.13074406735071  
 GSM2332159\_treat 0 0.13202777588807 0.0207654219739254 0.0123782368461477 0  
 0.118131931456368 0.0496597412572636 0 0.0214767674837649 0  
 0.0711311746445251 0.0113494328291073 0 0.106171547221758  
 0.19232005316597 0.116688472999763 0 0.0158523075055513  
 0.0955631593455239 0 0 0.0364839773822607  
 GSM2332160\_treat 0 0.0405160489253811 0.0164922712205655 0.157163040201998 0  
 0 0.0701651683732404 0 0.037625919583888 0 0.0415915624513162 0 0  
 0.19054913235897 0.0637252386264271 0.149644705889848 0.0145065515524754 0  
 0.186201529440579 0.0180892023746865 0 0.0137296290006238  
 GSM2332161\_treat 0 0.148868592071575 0 0.0971040123597142 0  
 0.0473617098178445 0.0670361204018611 0.004269970293148240.0251511940604998  
 0.002221778826850370 0.0452171568845679 0 0.167036512383257  
 0.14311587493467 0.0549328757909387 0 0.0264841848244082  
 0.0176009767611313 0.0904043329828852 0 0.063194707606649  
 GSM2332162\_treat 0 0.1401902325487 0.0219581823901591 0 0  
 0.093980646083031 0.102144874610134 0.0106560850698997 0.00364425623056237  
 0.030480079442449 0 0.0210352806933919 0.0255873937605837  
 0.115541031987236 0.191614333142547 0.077816600123627 0  
 0.000327962565738120.002649723897075240.0748679097343436 0  
 0.0875054077205222  
 GSM2332163\_treat 0 0.243217428036466 0.0355346029008119 0.038674376722176  
 0.007013239970303390.0578206637117669 0.0539128787119787 0  
 0.0381603224740109 0.102190058905492 0 0.003600626251872 0  
 0.10052904799867 0.057822932346044 0.111031908363574 0  
 0.0114178999936625 0.139074013613171 0 0 0  
 GSM2332164\_treat 0 0.14999361974205 0.009776371237884570.0620997499004886 0  
 0.0106162538497911 0.05288171041451 0.02162979012361 0.0143454160071086



0.000146018249664668 0 0.0667770706067631 0.0426639817482222  
 0.0809631590770744 0.155419464749478 0.0979170697903015 0.0160586017571427  
 0.0279027937548993 0 0.0400700647226723 0 0.150738864268339  
 GSM2332165\_treat 0.0348745636149098 0.14043142603125 0.0134621147854819  
 0.0857094895794869 0 0.012679772082303 0.079880034639532  
 0.0348504819582408 0.0323945770063167 0 0.0281785948183264  
 8.159609493718e-05 0.002088377087040730.174855725986179 0.0909151260233295  
 0.101590436609124 0 0.007572231105819360.0489363879409377  
 0.052027598655148 0 0.0594714659816373  
 GSM2332166\_treat 0 0.177916602348662 0.0520703118598076 0.0390578693958066 0  
 0.0834959707147298 0.0125496600033196 0 0.0338966324372962  
 0.0398931479472434 0.005057741630433490.0228919547121642 0  
 0.113766385354694 0.0737388164094423 0.161687473748413 0.0348262615269359 0  
 0.0890163698795314 0.0374447251863667 0.008809698511176890.0138803783339769  
 GSM2332167\_treat 0 0.261314799381015 0 0.0509192341246442 0  
 0.0574627917819259 0.0406325037597694 0.0479817918905104 0.0405259286571999  
 0.004035907616147590 0.002938115763929160 0.145324223610789  
 0.0866062313096189 0.0508376369571961 0.002442679875790390  
 0.143977661313324 0.0169319544443414 0.0108574500427526 0.0372110894710474  
 GSM2332168\_treat 0 0.0473363729971986 0.0036455813967164 0.0320727765838925 0  
 0.212177249043994 0.006529690647486440 0.0269685762257754  
 0.0283725488117039 0 0.0183115469719186 0 0.138546147628951  
 0.141122431892182 0.130418722256696 0 0 0.0101590540014671  
 0.12691055725979 0.0134330033079794 0.0639957409742488  
 GSM2332169\_treat 0 0.0883004095018105 0 0.027820025053926 0  
 0.140396423206721 0.0668470237967536 0 0 0.0608168444260541  
 0.005159393725072640.007477929756617990 0.0101145923857561  
 0.14121600285996 0.241977522570397 0.0157886349865439 0 0  
 0.106894504884079 0.0221982618177998 0.0649924310285084  
 GSM2332170\_treat 0 0.0873433635589614 0.0414293771985456 0.0136780686371755 0  
 0.0450222946398637 0.0865948617461052 0.0244103257774114 0.0359287035612238 0  
 0.0291391120952956 0.0183272799126498 0 0.227320968421803  
 0.0687031784702625 0.0652408453057541 0.002229115678338360  
 0.166562054171891 0.0457825121801414 0 0.0422879386445774  
 GSM2332171\_treat 0 0.126889843930019 0.0626871974771756 0 0  
 0.108111337069285 0.0323593405128005 0 0.0192654827174133 0  
 0.0667301741265215 0 0.0227774102601347 0.255328567542738  
 0.002367394621262420.0502453239506202 0.005512682781314940.0182765696687405  
 0.0121359974320483 0.0601582707791082 0 0.157154407130817  
 GSM2332172\_treat 0 0.0818684035515909 0 0.0663464685360185 0  
 0.202155781353985 0.0397915123271399 0 0 0.0676658892643085 0 0 0  
 0 0.0518041600480781 0.12171554364523 0.074993768391842 0 0  
 0.228021672530368 0.0656368003514396 0  
 GSM2332174\_treat 0 0.155023846244668 0.0453400384705406 0 0  
 0.0622961691802744 0.0386655188058387 0 0.0226165373654019  
 0.0367580191130066 0.009672572436665920.000558633918702828 0  
 0.160668690610831 0.0973874017788646 0.115049707425758 0 0

|                  |                    |                      |                      |                     |                      |                   |                    |   |
|------------------|--------------------|----------------------|----------------------|---------------------|----------------------|-------------------|--------------------|---|
|                  | 0.0764284483655767 | 0.131526509215519    | 0                    | 0.0480079070683509  |                      |                   |                    |   |
| GSM2332175_treat | 0                  | 0.0769778487149605   | 0                    | 0                   | 0                    | 0.255538856422149 | 0                  | 0 |
|                  | 0.0128509239108207 | 0                    | 0                    | 0.0594067442883435  | 0                    | 0.106714732838696 |                    |   |
|                  | 0.153700532771231  | 0.182668249758641    | 0                    | 0.0087697197459854  |                      |                   |                    |   |
|                  | 0.123782045480189  | 0                    | 0                    | 0.0195903460689845  |                      |                   |                    |   |
| GSM2332176_treat | 0                  | 0.122932441960572    | 0                    | 0.0753965448418913  | 0                    |                   |                    |   |
|                  | 0.114502313443384  | 0.0177742231282455   | 0                    | 0.0305930565797153  |                      |                   |                    |   |
|                  | 0.0487581045711749 | 0.0202317250979247   | 0.0205963056960779   | 0                   |                      |                   |                    |   |
|                  | 0.113522623550767  | 0.0896889555991329   | 0.228906065690731    | 0                   |                      |                   |                    |   |
|                  | 0.014821304926803  | 0.0719890538188596   | 0.0037252261107406   | 0.0138197576440173  |                      |                   |                    |   |
|                  | 0.0127422973399632 |                      |                      |                     |                      |                   |                    |   |
| GSM2332177_treat | 0                  | 0.089031144428894    | 0.0169744766834305   | 0.0738522306758775  | 0                    |                   |                    |   |
|                  | 0.0220821409891599 | 0.0538456710931473   | 0                    | 0.0517035964176339  |                      |                   |                    |   |
|                  | 0.0560470120283668 | 0                    | 0.0631036431332758   | 0                   | 0.0944845820215584   |                   |                    |   |
|                  | 0.115571027777973  | 0.192413640775549    | 0.0130325147500171   | 0                   |                      |                   |                    |   |
|                  | 0.131583594750232  | 0.005546329274643880 | 0.0011769660972836   | 0.0195514291029573  |                      |                   |                    |   |
| GSM2332178_treat | 0                  | 0.159346361619948    | 0                    | 0.089679624180888   | 0                    |                   |                    |   |
|                  | 0.121036783184663  | 0.0205039066209333   | 0                    | 0                   | 0.004001939069282240 |                   |                    |   |
|                  | 0.0357648270251299 | 0.001059196527099220 | 0.0717834086778788   | 0.146471157713164   |                      |                   |                    |   |
|                  | 0.1389801846177    | 0                    | 0                    | 0.0413896001665219  | 0.127343152576876    | 0                 |                    |   |
|                  | 0.0426398580199146 |                      |                      |                     |                      |                   |                    |   |
| GSM2332179_treat | 0                  | 0.170509284481001    | 0.0318966448220806   | 0.0740713191455049  | 0                    |                   |                    |   |
|                  | 0.066369594833633  | 0.0202913494352577   | 0.0366303743528534   | 0.0362444559421236  | 0                    |                   |                    |   |
|                  | 0                  | 0.0941131779739778   | 0                    | 0.140949520466451   | 0.115563291930879    |                   |                    |   |
|                  | 0.04884750770696   | 0                    | 0                    | 0                   | 0.0808706427747537   | 0                 | 0.0836428361345251 |   |
| GSM2332181_treat | 0                  | 0.003989009276192390 | 0.205096383585243    | 0.00617147914711992 |                      |                   |                    |   |
|                  | 0.0543223450450557 | 0                    | 0.0926687207847736   | 0.0845541532590948  |                      |                   |                    |   |
|                  | 0.0408808780719418 | 0.0305355320953934   | 0.0559630403363868   | 0                   |                      |                   |                    |   |
|                  | 0.0440013258305312 | 0                    | 0.067028160791661    | 0.0406200774733969  |                      |                   |                    |   |
|                  | 0.139083365650872  | 0                    | 0.0265433011579526   | 0.108542227494385   | 0                    | 0                 | 0                  |   |
| GSM2332182_treat | 0                  | 0.164901744389945    | 0.0238180663653427   | 0.0131790694176458  | 0                    |                   |                    |   |
|                  | 0.125044028246367  | 0.0771851298338219   | 0.0178665974320472   | 0                   |                      |                   |                    |   |
|                  | 0.0368550896013435 | 0.0034886864115448   | 0.0239621332763409   | 0                   |                      |                   |                    |   |
|                  | 0.144559708154768  | 0.0883329083305797   | 0.0868708019244297   | 0                   |                      |                   |                    |   |
|                  | 0.0238972099966039 | 0                    | 0.131419029425658    | 0                   | 0.0386197971935622   |                   |                    |   |
| GSM2332183_treat | 0                  | 0.0333956725802764   | 0.0700963820201178   | 0                   | 0.10408920935617     | 0                 |                    |   |
|                  | 0.146836898258631  | 0.0327461778765322   | 0                    | 0                   | 0.063200262516178    | 0                 |                    |   |
|                  | 0.0278589604456016 | 0                    | 0.0546605342000374   | 0.114794479087487   |                      |                   |                    |   |
|                  | 0.178850877315346  | 0.004000557400503060 | 0.130118768230419    |                     |                      |                   |                    |   |
|                  | 0.0207307110057292 | 0.006216897353318770 | 0.0124036123536532   |                     |                      |                   |                    |   |
| GSM2332184_treat | 0                  | 0.0167067404249475   | 0.130502458992685    | 0                   | 0.004294730577000890 |                   |                    |   |
|                  | 0.129307113043823  | 0                    | 0.004691252289571620 | 0.0197639231176041  |                      |                   |                    |   |
|                  | 0.0362371246469483 | 0                    | 0.0899196133525978   | 0                   | 0.0833474037706662   |                   |                    |   |
|                  | 0.103862748047738  | 0.142750690668956    | 0                    | 0.0405467647229394  |                      |                   |                    |   |
|                  | 0.195107405820578  | 0                    | 0                    | 0.00296203052394414 |                      |                   |                    |   |
| GSM2332185_treat | 0                  | 0.013100907853011    | 0.0740160777517028   | 0                   | 0.0120371368995605   | 0                 |                    |   |
|                  | 0.195581452350318  | 0.0366116439352894   | 0.0307261914771685   | 0                   |                      |                   |                    |   |

0.0558316661009931 0 0.0356304539646587 0 0.120729643994054  
0.187283281384695 0.102970726961857 0 0.0138181368501389 0  
0.0672131976898249 0 0.0544494827867284  
GSM2332186\_treat 0 0.111401965541001 0.0401032001448335 0.047716763059224 0  
0.222668777871818 0.0201408913064614 0 0 0.0610003500308515 0  
0.043433510316456 0.0106673035185865 0.075386144974177 0.0675222303575015  
0.186435547221896 0 0 0.007153626348918070.0586511251052628 0  
0.0477185642030125  
GSM2332187\_treat 0 0.13851167387306 0.0419666346928235 0 0  
0.122655708490953 0.0866028571245148 0.003772576404473250  
0.0443830517456478 0.015494019652563 0.0217100847669403 0  
0.0851083983279056 0.114670098202862 0.107030110702712 0 0  
0.203361660687679 0 0 0.0147331253278655  
GSM2332189\_treat 0 0.0999031375473035 0 0 0 0.159714814037608  
0.0714113338902721 0.0226239037260193 0 0.002515693623887410  
0.105129683926903 0 0.0640319058561419 0.183712660317577  
0.112259425569758 0.001745653607547680 0 0.0976766419940778 0  
0.0792751459029055  
GSM2332190\_treat 0 0.0827462422285797 0.0364798648436013 0.131526190284052 0  
0.0627027524926099 0.0279145019697716 0.0111601338314552 0  
0.0171393302866861 0 0.0928605035827868 0 0.0403770010145182  
0.144065980191756 0.223224084690936 0 0 0.103651592571556 0 0  
0.0261518220116906  
GSM2332191\_treat 0.005119222849668660.157018959601448 0.0262818809859537  
0.0715924482691449 0 0.0117896804137164 0.0833393332528443  
0.0531061601472796 0.0264148598675063 0.0858749777051975 0  
0.0647320570943997 0 0.112358426048124 0.0670766732759186  
0.115606679207054 0 0 0.101843130096489 0 0.00827317748558298  
0.00957233369967232  
GSM2332192\_treat 0 0.154586589962164 0.0288117135889123 0.0509928051026103 0  
0.140294606438108 0.0403777390551452 0 0 0.0329327680235756 0  
0.012386682355518 0 0.0358569984301003 0.057181342509775  
0.195856927771109 0.003144227909884350 0.223476137659234  
0.0100910994625375 0.006043487865257640.00796687386606756  
GSM2332193\_treat 0.004172843845462140.0573034543842197 0.0201072122815153  
0.100155602587725 0 0.144723048714594 0.0922102649225861 0 0  
0.0572580493054782 0.009192094916296260 0 0.115019888494032  
0.120206286688549 0.156261085029009 0.002892265730664120 0  
0.108540288301065 0 0.0119576147988042  
GSM2332194\_treat 0.0252229498785207 0.003910795852943190 0.008131538415467240  
0.140479285614389 0.034962519587323 0 0 0.0445501201147477 0  
0.0384261474679049 0.0402804600121799 0.0333080997936678 0.0636719871846963  
0.107209145468868 0.001988053168585820 0 0.214115055953857  
0.0351761585306292 0.208567682956221  
GSM2332195\_treat 0 0.0923920028951629 0.0354895307109061 0.121384444668187 0  
0.0752311501855545 0.0442695304793104 0 0.0290069695879288 0  
0.0374714332973762 0.0169234213771135 0 0.127817247254721

0.169341910603689 0.113679714642229 0 0 0 0.0755817151448603 0  
 0.0614109291529616  
 GSM2332196\_treat 0 0.107459081822142 0.029761220106847 6.33488304432871e-05  
 0 0.110464032678972 0.033888318882714 0 0 0.0290265429741228 0  
 0.0897143416800899 0 0 0.0787929311352729 0.172300700176785  
 0.046025871883922 0 0 0.166461320208137 0.0506593512061459  
 0.0853829384144055  
 GSM2332198\_treat 0 0.251298767248052 0 0.007891950721711340 0  
 0.12745186347125 0.0329469016398132 0.030040415899738 0.0837017752065054 0  
 0.002597223015583860 0.122058778019137 0.0946106212025962  
 0.0762016359908587 0 0.035369679736564 0.0829963761586814  
 0.0115225078888087 0 0.0413115038006999  
 GSM2332199\_treat 0 0.0846486519478736 0.0286481981725512 0.0334963996177301 0  
 0.109075429136521 0.0199045992104112 0.009415357746162290.0468813301529114  
 0.0731381840522896 0 0.0677601577696048 0 0.0619525587440401  
 0.129099519859419 0.140802843103109 0.0638089106533455 0  
 0.0411160852233846 0.0365855350295697 0.000370421008063761  
 0.0532958185730132  
 GSM2332200\_treat 0 0.124996541313342 0 0 0 0.173147063744739  
 0.0384235584711925 0 0 0 0.0714267177846031 0  
 0.182133991030856 0.126618098216685 0.10886979573081 0.000215470313412699  
 0 0.144889687292759 0 0 0.0292790761015995  
 GSM2332201\_treat 0 0.12531744909407 0.014200359870835 0 0  
 0.199226638686111 0 0 0 0.010503779789131 0 0.0408552549097025 0  
 0.214318718485819 0.0582519391253202 0.008548877549373590.0134195818048426 0  
 0 0.204738358771727 0 0.110619041913068  
 GSM2332202\_treat 0 0.112193983332712 0.003269267653560510.0422859933958362 0  
 0.129352129725152 0.0190872227746824 0 0 0.0289622735562966 0  
 0.0226957811597788 0 0.127342024050162 0.105331365772677  
 0.163845681913353 0 0 0 0.170169700268511 0.0157899534478906  
 0.0596746229493871  
 GSM2332203\_treat 0 0.172547680165398 0.0216146384412688 0.002589302263598260  
 0.155723996531884 0.051569945879003 0 0.0247394568726793  
 0.0257698184899314 0 0.0447097063268916 0 0.0658986404564859  
 0.116185783795162 0.172547111871733 0 0.00717982452632622  
 0.124183753361224 0 0.008218586945203070.00652175407321144  
 GSM2332204\_treat 0.0625181406178858 0.0725955755054485 0.0393743809017998  
 0.0432881080159456 0 0.138738766777337 0.0432047602512021  
 0.0199936530761556 0.0490919671235887 0 0 0.0810325454336275 0  
 0.205830744465049 0.103549824588579 0.0531361701461722 0 0  
 0.0436218384663402 0.000596674845414130.043426849785455 0  
 GSM2332205\_treat 0.004742412437946180.080472762982765 0 0 0  
 0.228410567695483 0.0398605484534877 0 0.00595945864228818  
 0.0305275529733471 0 0.0413158041075433 0 0.0432795390943879  
 0.130382093574081 0.169043388234385 0 0 0 0.176471850646866 0  
 0.0495340211574197
